# Supplementary material
Source: publisher site journal article supplement (https://oneecosystem.pensoft.net/article/download/suppl/6734259/)
Supplement: Supplementary file 1

## Sheet: Feuil1
Individual	Field_label	Species	Country	Type_of_Crop	Latitude	Landscape_intensity_gradient	SNH_edge_density	CA_Grassland	CA_Urban	Shannon_diversity_index	Pesticide_use	Fat_body	AI1	AI2	AI3	AI4	AI5	AI6	AI7	AI8	AI9	AI10	AI11	AI12	AI13	AI14	AI15	AI16	AI17	AI18	AI19	AI20	AI21	AI22	AI23	AI24	AI25	AI26	AI27	AI28
EST_AP1A	EST_OSR_01_A	Apis mellifera	Estonia	Oilseed rape	58.56994	42.80	195.415	69.73	0.957	1.171	NA	6.20	NA	NA	NA	NA	NA	NA	NA	NA	NA	NA	NA	NA	NA	NA	NA	NA	NA	NA	NA	NA	NA	NA	NA	NA	NA	NA	NA	NA
EST_AP1B	EST_OSR_01_A	Apis mellifera	Estonia	Oilseed rape	58.56994	42.80	195.415	69.73	0.957	1.171	NA	5.93	NA	NA	NA	NA	NA	NA	NA	NA	NA	NA	NA	NA	NA	NA	NA	NA	NA	NA	NA	NA	NA	NA	NA	NA	NA	NA	NA	NA
EST_AP1C	EST_OSR_01_A	Apis mellifera	Estonia	Oilseed rape	58.56994	42.80	195.415	69.73	0.957	1.171	NA	14.75	NA	NA	NA	NA	NA	NA	NA	NA	NA	NA	NA	NA	NA	NA	NA	NA	NA	NA	NA	NA	NA	NA	NA	NA	NA	NA	NA	NA
EST_AP1D	EST_OSR_01_A	Apis mellifera	Estonia	Oilseed rape	58.56994	42.80	195.415	69.73	0.957	1.171	NA	8.96	NA	NA	NA	NA	NA	NA	NA	NA	NA	NA	NA	NA	NA	NA	NA	NA	NA	NA	NA	NA	NA	NA	NA	NA	NA	NA	NA	NA
EST_AP1E	EST_OSR_01_A	Apis mellifera	Estonia	Oilseed rape	58.56994	42.80	195.415	69.73	0.957	1.171	NA	10.20	NA	NA	NA	NA	NA	NA	NA	NA	NA	NA	NA	NA	NA	NA	NA	NA	NA	NA	NA	NA	NA	NA	NA	NA	NA	NA	NA	NA
EST_AP2A	EST_OSR_02_A	Apis mellifera	Estonia	Oilseed rape	58.60962	73.11	159.101	33.936	0.994	0.9	53.36	8.00	Dimethenamid-p	Metazachlor	Quinmerac	Boscalid	Dimoxystrobin	Metconazole	Mepiquat-chloride	Ethametsulfuron methyl	NA	NA	NA	NA	NA	NA	NA	NA	NA	NA	NA	NA	NA	NA	NA	NA	NA	NA	NA	NA
EST_AP2B	EST_OSR_02_A	Apis mellifera	Estonia	Oilseed rape	58.60962	73.11	159.101	33.936	0.994	0.9	53.36	7.46	Dimethenamid-p	Metazachlor	Quinmerac	Boscalid	Dimoxystrobin	Metconazole	Mepiquat-chloride	Ethametsulfuron methyl	NA	NA	NA	NA	NA	NA	NA	NA	NA	NA	NA	NA	NA	NA	NA	NA	NA	NA	NA	NA
EST_AP2C	EST_OSR_02_A	Apis mellifera	Estonia	Oilseed rape	58.60962	73.11	159.101	33.936	0.994	0.9	53.36	11.24	Dimethenamid-p	Metazachlor	Quinmerac	Boscalid	Dimoxystrobin	Metconazole	Mepiquat-chloride	Ethametsulfuron methyl	NA	NA	NA	NA	NA	NA	NA	NA	NA	NA	NA	NA	NA	NA	NA	NA	NA	NA	NA	NA
EST_AP2D	EST_OSR_02_A	Apis mellifera	Estonia	Oilseed rape	58.60962	73.11	159.101	33.936	0.994	0.9	53.36	8.70	Dimethenamid-p	Metazachlor	Quinmerac	Boscalid	Dimoxystrobin	Metconazole	Mepiquat-chloride	Ethametsulfuron methyl	NA	NA	NA	NA	NA	NA	NA	NA	NA	NA	NA	NA	NA	NA	NA	NA	NA	NA	NA	NA
EST_AP2E	EST_OSR_02_A	Apis mellifera	Estonia	Oilseed rape	58.60962	73.11	159.101	33.936	0.994	0.9	53.36	9.28	Dimethenamid-p	Metazachlor	Quinmerac	Boscalid	Dimoxystrobin	Metconazole	Mepiquat-chloride	Ethametsulfuron methyl	NA	NA	NA	NA	NA	NA	NA	NA	NA	NA	NA	NA	NA	NA	NA	NA	NA	NA	NA	NA
EST_A3A	EST_OSR_03_A	Apis mellifera	Estonia	Oilseed rape	57.97075	59.46	184.37	19.846	4.606	1.048	NA	27.74	NA	NA	NA	NA	NA	NA	NA	NA	NA	NA	NA	NA	NA	NA	NA	NA	NA	NA	NA	NA	NA	NA	NA	NA	NA	NA	NA	NA
EST_AP3B	EST_OSR_03_A	Apis mellifera	Estonia	Oilseed rape	57.97075	59.46	184.37	19.846	4.606	1.048	NA	5.74	NA	NA	NA	NA	NA	NA	NA	NA	NA	NA	NA	NA	NA	NA	NA	NA	NA	NA	NA	NA	NA	NA	NA	NA	NA	NA	NA	NA
EST_AP3C	EST_OSR_03_A	Apis mellifera	Estonia	Oilseed rape	57.97075	59.46	184.37	19.846	4.606	1.048	NA	9.65	NA	NA	NA	NA	NA	NA	NA	NA	NA	NA	NA	NA	NA	NA	NA	NA	NA	NA	NA	NA	NA	NA	NA	NA	NA	NA	NA	NA
EST_AP3D	EST_OSR_03_A	Apis mellifera	Estonia	Oilseed rape	57.97075	59.46	184.37	19.846	4.606	1.048	NA	17.12	NA	NA	NA	NA	NA	NA	NA	NA	NA	NA	NA	NA	NA	NA	NA	NA	NA	NA	NA	NA	NA	NA	NA	NA	NA	NA	NA	NA
EST_AP3E	EST_OSR_03_A	Apis mellifera	Estonia	Oilseed rape	57.97075	59.46	184.37	19.846	4.606	1.048	NA	20.17	NA	NA	NA	NA	NA	NA	NA	NA	NA	NA	NA	NA	NA	NA	NA	NA	NA	NA	NA	NA	NA	NA	NA	NA	NA	NA	NA	NA
EST_AP4A	EST_OSR_04_A	Apis mellifera	Estonia	Oilseed rape	58.49502	59.25	157.638	36.323	1.66	1.02	NA	16.77	NA	NA	NA	NA	NA	NA	NA	NA	NA	NA	NA	NA	NA	NA	NA	NA	NA	NA	NA	NA	NA	NA	NA	NA	NA	NA	NA	NA
EST_AP4B	EST_OSR_04_A	Apis mellifera	Estonia	Oilseed rape	58.49502	59.25	157.638	36.323	1.66	1.02	NA	20.69	NA	NA	NA	NA	NA	NA	NA	NA	NA	NA	NA	NA	NA	NA	NA	NA	NA	NA	NA	NA	NA	NA	NA	NA	NA	NA	NA	NA
EST_AP4C	EST_OSR_04_A	Apis mellifera	Estonia	Oilseed rape	58.49502	59.25	157.638	36.323	1.66	1.02	NA	12.41	NA	NA	NA	NA	NA	NA	NA	NA	NA	NA	NA	NA	NA	NA	NA	NA	NA	NA	NA	NA	NA	NA	NA	NA	NA	NA	NA	NA
EST_AP4D	EST_OSR_04_A	Apis mellifera	Estonia	Oilseed rape	58.49502	59.25	157.638	36.323	1.66	1.02	NA	18.75	NA	NA	NA	NA	NA	NA	NA	NA	NA	NA	NA	NA	NA	NA	NA	NA	NA	NA	NA	NA	NA	NA	NA	NA	NA	NA	NA	NA
EST_AP4E	EST_OSR_04_A	Apis mellifera	Estonia	Oilseed rape	58.49502	59.25	157.638	36.323	1.66	1.02	NA	16.13	NA	NA	NA	NA	NA	NA	NA	NA	NA	NA	NA	NA	NA	NA	NA	NA	NA	NA	NA	NA	NA	NA	NA	NA	NA	NA	NA	NA
EST_AP5A	EST_OSR_05_A	Apis mellifera	Estonia	Oilseed rape	58.54678	63.46	239.998	37.704	5.417	1.075	NA	9.39	NA	NA	NA	NA	NA	NA	NA	NA	NA	NA	NA	NA	NA	NA	NA	NA	NA	NA	NA	NA	NA	NA	NA	NA	NA	NA	NA	NA
EST_AP5B	EST_OSR_05_A	Apis mellifera	Estonia	Oilseed rape	58.54678	63.46	239.998	37.704	5.417	1.075	NA	5.03	NA	NA	NA	NA	NA	NA	NA	NA	NA	NA	NA	NA	NA	NA	NA	NA	NA	NA	NA	NA	NA	NA	NA	NA	NA	NA	NA	NA
EST_AP5C	EST_OSR_05_A	Apis mellifera	Estonia	Oilseed rape	58.54678	63.46	239.998	37.704	5.417	1.075	NA	10.26	NA	NA	NA	NA	NA	NA	NA	NA	NA	NA	NA	NA	NA	NA	NA	NA	NA	NA	NA	NA	NA	NA	NA	NA	NA	NA	NA	NA
EST_AP5D	EST_OSR_05_A	Apis mellifera	Estonia	Oilseed rape	58.54678	63.46	239.998	37.704	5.417	1.075	NA	12.39	NA	NA	NA	NA	NA	NA	NA	NA	NA	NA	NA	NA	NA	NA	NA	NA	NA	NA	NA	NA	NA	NA	NA	NA	NA	NA	NA	NA
EST_AP5E	EST_OSR_05_A	Apis mellifera	Estonia	Oilseed rape	58.54678	63.46	239.998	37.704	5.417	1.075	NA	9.97	NA	NA	NA	NA	NA	NA	NA	NA	NA	NA	NA	NA	NA	NA	NA	NA	NA	NA	NA	NA	NA	NA	NA	NA	NA	NA	NA	NA
EST_AP6A	EST_OSR_06_A	Apis mellifera	Estonia	Oilseed rape	57.92894	52.8	215.911	25.84	2.014	1.034	NA	5.93	NA	NA	NA	NA	NA	NA	NA	NA	NA	NA	NA	NA	NA	NA	NA	NA	NA	NA	NA	NA	NA	NA	NA	NA	NA	NA	NA	NA
EST_AP6B	EST_OSR_06_A	Apis mellifera	Estonia	Oilseed rape	57.92894	52.8	215.911	25.84	2.014	1.034	NA	4.51	NA	NA	NA	NA	NA	NA	NA	NA	NA	NA	NA	NA	NA	NA	NA	NA	NA	NA	NA	NA	NA	NA	NA	NA	NA	NA	NA	NA
EST_AP6C	EST_OSR_06_A	Apis mellifera	Estonia	Oilseed rape	57.92894	52.8	215.911	25.84	2.014	1.034	NA	7.69	NA	NA	NA	NA	NA	NA	NA	NA	NA	NA	NA	NA	NA	NA	NA	NA	NA	NA	NA	NA	NA	NA	NA	NA	NA	NA	NA	NA
EST_AP6D	EST_OSR_06_A	Apis mellifera	Estonia	Oilseed rape	57.92894	52.8	215.911	25.84	2.014	1.034	NA	5.77	NA	NA	NA	NA	NA	NA	NA	NA	NA	NA	NA	NA	NA	NA	NA	NA	NA	NA	NA	NA	NA	NA	NA	NA	NA	NA	NA	NA
EST_AP6E	EST_OSR_06_A	Apis mellifera	Estonia	Oilseed rape	57.92894	52.8	215.911	25.84	2.014	1.034	NA	14.08	NA	NA	NA	NA	NA	NA	NA	NA	NA	NA	NA	NA	NA	NA	NA	NA	NA	NA	NA	NA	NA	NA	NA	NA	NA	NA	NA	NA
EST_AP7A	EST_OSR_07_A	Apis mellifera	Estonia	Oilseed rape	58.29213	44.49	323.922	63.501	8.442	1.324	NA	9.88	NA	NA	NA	NA	NA	NA	NA	NA	NA	NA	NA	NA	NA	NA	NA	NA	NA	NA	NA	NA	NA	NA	NA	NA	NA	NA	NA	NA
EST_AP7B	EST_OSR_07_A	Apis mellifera	Estonia	Oilseed rape	58.29213	44.49	323.922	63.501	8.442	1.324	NA	5.43	NA	NA	NA	NA	NA	NA	NA	NA	NA	NA	NA	NA	NA	NA	NA	NA	NA	NA	NA	NA	NA	NA	NA	NA	NA	NA	NA	NA
EST_AP7C	EST_OSR_07_A	Apis mellifera	Estonia	Oilseed rape	58.29213	44.49	323.922	63.501	8.442	1.324	NA	9.52	NA	NA	NA	NA	NA	NA	NA	NA	NA	NA	NA	NA	NA	NA	NA	NA	NA	NA	NA	NA	NA	NA	NA	NA	NA	NA	NA	NA
EST_AP7D	EST_OSR_07_A	Apis mellifera	Estonia	Oilseed rape	58.29213	44.49	323.922	63.501	8.442	1.324	NA	12.66	NA	NA	NA	NA	NA	NA	NA	NA	NA	NA	NA	NA	NA	NA	NA	NA	NA	NA	NA	NA	NA	NA	NA	NA	NA	NA	NA	NA
EST_AP7E	EST_OSR_07_A	Apis mellifera	Estonia	Oilseed rape	58.29213	44.49	323.922	63.501	8.442	1.324	NA	12.88	NA	NA	NA	NA	NA	NA	NA	NA	NA	NA	NA	NA	NA	NA	NA	NA	NA	NA	NA	NA	NA	NA	NA	NA	NA	NA	NA	NA
EST_AP8A	EST_OSR_08_A	Apis mellifera	Estonia	Oilseed rape	58.65849	44.93	282.178	67.504	3.647	1.349	9.983	11.94	NA	NA	NA	NA	NA	NA	NA	NA	NA	NA	NA	NA	NA	NA	NA	NA	NA	NA	NA	NA	NA	NA	NA	NA	NA	NA	NA	NA
EST_AP8B	EST_OSR_08_A	Apis mellifera	Estonia	Oilseed rape	58.65849	44.93	282.178	67.504	3.647	1.349	9.983	5.79	NA	NA	NA	NA	NA	NA	NA	NA	NA	NA	NA	NA	NA	NA	NA	NA	NA	NA	NA	NA	NA	NA	NA	NA	NA	NA	NA	NA
EST_AP8C	EST_OSR_08_A	Apis mellifera	Estonia	Oilseed rape	58.65849	44.93	282.178	67.504	3.647	1.349	9.983	10.53	NA	NA	NA	NA	NA	NA	NA	NA	NA	NA	NA	NA	NA	NA	NA	NA	NA	NA	NA	NA	NA	NA	NA	NA	NA	NA	NA	NA
EST_AP8D	EST_OSR_08_A	Apis mellifera	Estonia	Oilseed rape	58.65849	44.93	282.178	67.504	3.647	1.349	9.983	10.71	NA	NA	NA	NA	NA	NA	NA	NA	NA	NA	NA	NA	NA	NA	NA	NA	NA	NA	NA	NA	NA	NA	NA	NA	NA	NA	NA	NA
EST_AP8E	EST_OSR_08_A	Apis mellifera	Estonia	Oilseed rape	58.65849	44.93	282.178	67.504	3.647	1.349	9.983	13.04	NA	NA	NA	NA	NA	NA	NA	NA	NA	NA	NA	NA	NA	NA	NA	NA	NA	NA	NA	NA	NA	NA	NA	NA	NA	NA	NA	NA
EST_AP9A	EST_APP_09_A	Apis mellifera	Estonia	Apple	58.18442	52.66	351.883	90.997	3.31	1.603	NA	12.06	NA	NA	NA	NA	NA	NA	NA	NA	NA	NA	NA	NA	NA	NA	NA	NA	NA	NA	NA	NA	NA	NA	NA	NA	NA	NA	NA	NA
EST_AP9B	EST_APP_09_A	Apis mellifera	Estonia	Apple	58.18442	52.66	351.883	90.997	3.31	1.603	NA	7.95	NA	NA	NA	NA	NA	NA	NA	NA	NA	NA	NA	NA	NA	NA	NA	NA	NA	NA	NA	NA	NA	NA	NA	NA	NA	NA	NA	NA
EST_AP9C	EST_APP_09_A	Apis mellifera	Estonia	Apple	58.18442	52.66	351.883	90.997	3.31	1.603	NA	6.52	NA	NA	NA	NA	NA	NA	NA	NA	NA	NA	NA	NA	NA	NA	NA	NA	NA	NA	NA	NA	NA	NA	NA	NA	NA	NA	NA	NA
EST_AP9D	EST_APP_09_A	Apis mellifera	Estonia	Apple	58.18442	52.66	351.883	90.997	3.31	1.603	NA	3.06	NA	NA	NA	NA	NA	NA	NA	NA	NA	NA	NA	NA	NA	NA	NA	NA	NA	NA	NA	NA	NA	NA	NA	NA	NA	NA	NA	NA
EST_AP9E	EST_APP_09_A	Apis mellifera	Estonia	Apple	58.18442	52.66	351.883	90.997	3.31	1.603	NA	4.47	NA	NA	NA	NA	NA	NA	NA	NA	NA	NA	NA	NA	NA	NA	NA	NA	NA	NA	NA	NA	NA	NA	NA	NA	NA	NA	NA	NA
EST_AP11A	EST_APP_11_A	Apis mellifera	Estonia	Apple	58.52062	35.51	356.318	68.067	1.044	1.194	NA	14.85	NA	NA	NA	NA	NA	NA	NA	NA	NA	NA	NA	NA	NA	NA	NA	NA	NA	NA	NA	NA	NA	NA	NA	NA	NA	NA	NA	NA
EST_AP11B	EST_APP_11_A	Apis mellifera	Estonia	Apple	58.52062	35.51	356.318	68.067	1.044	1.194	NA	11.54	NA	NA	NA	NA	NA	NA	NA	NA	NA	NA	NA	NA	NA	NA	NA	NA	NA	NA	NA	NA	NA	NA	NA	NA	NA	NA	NA	NA
EST_AP11C	EST_APP_11_A	Apis mellifera	Estonia	Apple	58.52062	35.51	356.318	68.067	1.044	1.194	NA	10.48	NA	NA	NA	NA	NA	NA	NA	NA	NA	NA	NA	NA	NA	NA	NA	NA	NA	NA	NA	NA	NA	NA	NA	NA	NA	NA	NA	NA
EST_AP11D	EST_APP_11_A	Apis mellifera	Estonia	Apple	58.52062	35.51	356.318	68.067	1.044	1.194	NA	12.75	NA	NA	NA	NA	NA	NA	NA	NA	NA	NA	NA	NA	NA	NA	NA	NA	NA	NA	NA	NA	NA	NA	NA	NA	NA	NA	NA	NA
EST_AP11E	EST_APP_11_A	Apis mellifera	Estonia	Apple	58.52062	35.51	356.318	68.067	1.044	1.194	NA	9.45	NA	NA	NA	NA	NA	NA	NA	NA	NA	NA	NA	NA	NA	NA	NA	NA	NA	NA	NA	NA	NA	NA	NA	NA	NA	NA	NA	NA
EST_AP12A	EST_APP_12_A	Apis mellifera	Estonia	Apple	58.46439	61.53	303.378	46.008	2.083	1.488	8.47	15.97	Propaquizafop	Difenoconazole	Dithianon	Alpha-cypermethrin	Tau-fluvalinate	Boscalid	Pyraclostrobin	NA	NA	NA	NA	NA	NA	NA	NA	NA	NA	NA	NA	NA	NA	NA	NA	NA	NA	NA	NA	NA
EST_AP12B	EST_APP_12_A	Apis mellifera	Estonia	Apple	58.46439	61.53	303.378	46.008	2.083	1.488	8.47	13.16	Propaquizafop	Difenoconazole	Dithianon	Alpha-cypermethrin	Tau-fluvalinate	Boscalid	Pyraclostrobin	NA	NA	NA	NA	NA	NA	NA	NA	NA	NA	NA	NA	NA	NA	NA	NA	NA	NA	NA	NA	NA
EST_AP12C	EST_APP_12_A	Apis mellifera	Estonia	Apple	58.46439	61.53	303.378	46.008	2.083	1.488	8.47	6.10	Propaquizafop	Difenoconazole	Dithianon	Alpha-cypermethrin	Tau-fluvalinate	Boscalid	Pyraclostrobin	NA	NA	NA	NA	NA	NA	NA	NA	NA	NA	NA	NA	NA	NA	NA	NA	NA	NA	NA	NA	NA
EST_AP12D	EST_APP_12_A	Apis mellifera	Estonia	Apple	58.46439	61.53	303.378	46.008	2.083	1.488	8.47	10.78	Propaquizafop	Difenoconazole	Dithianon	Alpha-cypermethrin	Tau-fluvalinate	Boscalid	Pyraclostrobin	NA	NA	NA	NA	NA	NA	NA	NA	NA	NA	NA	NA	NA	NA	NA	NA	NA	NA	NA	NA	NA
EST_AP12E	EST_APP_12_A	Apis mellifera	Estonia	Apple	58.46439	61.53	303.378	46.008	2.083	1.488	8.47	12.86	Propaquizafop	Difenoconazole	Dithianon	Alpha-cypermethrin	Tau-fluvalinate	Boscalid	Pyraclostrobin	NA	NA	NA	NA	NA	NA	NA	NA	NA	NA	NA	NA	NA	NA	NA	NA	NA	NA	NA	NA	NA
EST_AP13A	EST_APP_13_A	Apis mellifera	Estonia	Apple	58.24809	42.89	340.212	49.269	0.888	1.493	NA	8.41	NA	NA	NA	NA	NA	NA	NA	NA	NA	NA	NA	NA	NA	NA	NA	NA	NA	NA	NA	NA	NA	NA	NA	NA	NA	NA	NA	NA
EST_AP13B	EST_APP_13_A	Apis mellifera	Estonia	Apple	58.24809	42.89	340.212	49.269	0.888	1.493	NA	6.27	NA	NA	NA	NA	NA	NA	NA	NA	NA	NA	NA	NA	NA	NA	NA	NA	NA	NA	NA	NA	NA	NA	NA	NA	NA	NA	NA	NA
EST_AP13C	EST_APP_13_A	Apis mellifera	Estonia	Apple	58.24809	42.89	340.212	49.269	0.888	1.493	NA	2.90	NA	NA	NA	NA	NA	NA	NA	NA	NA	NA	NA	NA	NA	NA	NA	NA	NA	NA	NA	NA	NA	NA	NA	NA	NA	NA	NA	NA
EST_AP13D	EST_APP_13_A	Apis mellifera	Estonia	Apple	58.24809	42.89	340.212	49.269	0.888	1.493	NA	2.25	NA	NA	NA	NA	NA	NA	NA	NA	NA	NA	NA	NA	NA	NA	NA	NA	NA	NA	NA	NA	NA	NA	NA	NA	NA	NA	NA	NA
EST_AP13E	EST_APP_13_A	Apis mellifera	Estonia	Apple	58.24809	42.89	340.212	49.269	0.888	1.493	NA	5.96	NA	NA	NA	NA	NA	NA	NA	NA	NA	NA	NA	NA	NA	NA	NA	NA	NA	NA	NA	NA	NA	NA	NA	NA	NA	NA	NA	NA
EST_AP14A	EST_APP_14_A	Apis mellifera	Estonia	Apple	58.20628	43.85	501.087	77.726	8.618	1.453	4.05	15.46	Cyprodinil	Alpha-cypermethrin	Difenoconazole	NA	NA	NA	NA	NA	NA	NA	NA	NA	NA	NA	NA	NA	NA	NA	NA	NA	NA	NA	NA	NA	NA	NA	NA	NA
EST_AP14B	EST_APP_14_A	Apis mellifera	Estonia	Apple	58.20628	43.85	501.087	77.726	8.618	1.453	4.05	11.83	Cyprodinil	Alpha-cypermethrin	Difenoconazole	NA	NA	NA	NA	NA	NA	NA	NA	NA	NA	NA	NA	NA	NA	NA	NA	NA	NA	NA	NA	NA	NA	NA	NA	NA
EST_AP14C	EST_APP_14_A	Apis mellifera	Estonia	Apple	58.20628	43.85	501.087	77.726	8.618	1.453	4.05	12.50	Cyprodinil	Alpha-cypermethrin	Difenoconazole	NA	NA	NA	NA	NA	NA	NA	NA	NA	NA	NA	NA	NA	NA	NA	NA	NA	NA	NA	NA	NA	NA	NA	NA	NA
EST_AP14D	EST_APP_14_A	Apis mellifera	Estonia	Apple	58.20628	43.85	501.087	77.726	8.618	1.453	4.05	16.18	Cyprodinil	Alpha-cypermethrin	Difenoconazole	NA	NA	NA	NA	NA	NA	NA	NA	NA	NA	NA	NA	NA	NA	NA	NA	NA	NA	NA	NA	NA	NA	NA	NA	NA
EST_AP14E	EST_APP_14_A	Apis mellifera	Estonia	Apple	58.20628	43.85	501.087	77.726	8.618	1.453	4.05	11.00	Cyprodinil	Alpha-cypermethrin	Difenoconazole	NA	NA	NA	NA	NA	NA	NA	NA	NA	NA	NA	NA	NA	NA	NA	NA	NA	NA	NA	NA	NA	NA	NA	NA	NA
EST_AP15A	EST_APP_15_A	Apis mellifera	Estonia	Apple	58.08431	38.96	431.8	75.487	7.145	1.396	NA	14.86	NA	NA	NA	NA	NA	NA	NA	NA	NA	NA	NA	NA	NA	NA	NA	NA	NA	NA	NA	NA	NA	NA	NA	NA	NA	NA	NA	NA
EST_AP15B	EST_APP_15_A	Apis mellifera	Estonia	Apple	58.08431	38.96	431.8	75.487	7.145	1.396	NA	10.17	NA	NA	NA	NA	NA	NA	NA	NA	NA	NA	NA	NA	NA	NA	NA	NA	NA	NA	NA	NA	NA	NA	NA	NA	NA	NA	NA	NA
EST_AP15C	EST_APP_15_A	Apis mellifera	Estonia	Apple	58.08431	38.96	431.8	75.487	7.145	1.396	NA	11.94	NA	NA	NA	NA	NA	NA	NA	NA	NA	NA	NA	NA	NA	NA	NA	NA	NA	NA	NA	NA	NA	NA	NA	NA	NA	NA	NA	NA
EST_AP15D	EST_APP_15_A	Apis mellifera	Estonia	Apple	58.08431	38.96	431.8	75.487	7.145	1.396	NA	10.94	NA	NA	NA	NA	NA	NA	NA	NA	NA	NA	NA	NA	NA	NA	NA	NA	NA	NA	NA	NA	NA	NA	NA	NA	NA	NA	NA	NA
EST_AP15E	EST_APP_15_A	Apis mellifera	Estonia	Apple	58.08431	38.96	431.8	75.487	7.145	1.396	NA	11.76	NA	NA	NA	NA	NA	NA	NA	NA	NA	NA	NA	NA	NA	NA	NA	NA	NA	NA	NA	NA	NA	NA	NA	NA	NA	NA	NA	NA
EST_AP16A	EST_APP_16_A	Apis mellifera	Estonia	Apple	58.07982	41.98	189.024	22.555	2.182	1.155	NA	21.69	NA	NA	NA	NA	NA	NA	NA	NA	NA	NA	NA	NA	NA	NA	NA	NA	NA	NA	NA	NA	NA	NA	NA	NA	NA	NA	NA	NA
EST_AP16B	EST_APP_16_A	Apis mellifera	Estonia	Apple	58.07982	41.98	189.024	22.555	2.182	1.155	NA	12.33	NA	NA	NA	NA	NA	NA	NA	NA	NA	NA	NA	NA	NA	NA	NA	NA	NA	NA	NA	NA	NA	NA	NA	NA	NA	NA	NA	NA
EST_AP16C	EST_APP_16_A	Apis mellifera	Estonia	Apple	58.07982	41.98	189.024	22.555	2.182	1.155	NA	14.29	NA	NA	NA	NA	NA	NA	NA	NA	NA	NA	NA	NA	NA	NA	NA	NA	NA	NA	NA	NA	NA	NA	NA	NA	NA	NA	NA	NA
EST_AP16D	EST_APP_16_A	Apis mellifera	Estonia	Apple	58.07982	41.98	189.024	22.555	2.182	1.155	NA	21.74	NA	NA	NA	NA	NA	NA	NA	NA	NA	NA	NA	NA	NA	NA	NA	NA	NA	NA	NA	NA	NA	NA	NA	NA	NA	NA	NA	NA
EST_AP16E	EST_APP_16_A	Apis mellifera	Estonia	Apple	58.07982	41.98	189.024	22.555	2.182	1.155	NA	20.99	NA	NA	NA	NA	NA	NA	NA	NA	NA	NA	NA	NA	NA	NA	NA	NA	NA	NA	NA	NA	NA	NA	NA	NA	NA	NA	NA	NA
GER_AP1A	GER_OSR_01_A	Apis mellifera	Germany	Oilseed rape	51.63268	57.19	161.368	17.993	2.618	0.996	4.2	7.10	NA	NA	NA	NA	NA	NA	NA	NA	NA	NA	NA	NA	NA	NA	NA	NA	NA	NA	NA	NA	NA	NA	NA	NA	NA	NA	NA	NA
GER_AP1B	GER_OSR_01_A	Apis mellifera	Germany	Oilseed rape	51.63268	57.19	161.368	17.993	2.618	0.996	4.2	7.05	NA	NA	NA	NA	NA	NA	NA	NA	NA	NA	NA	NA	NA	NA	NA	NA	NA	NA	NA	NA	NA	NA	NA	NA	NA	NA	NA	NA
GER_AP1C	GER_OSR_01_A	Apis mellifera	Germany	Oilseed rape	51.63268	57.19	161.368	17.993	2.618	0.996	4.2	11.38	NA	NA	NA	NA	NA	NA	NA	NA	NA	NA	NA	NA	NA	NA	NA	NA	NA	NA	NA	NA	NA	NA	NA	NA	NA	NA	NA	NA
GER_AP1D	GER_OSR_01_A	Apis mellifera	Germany	Oilseed rape	51.63268	57.19	161.368	17.993	2.618	0.996	4.2	9.14	NA	NA	NA	NA	NA	NA	NA	NA	NA	NA	NA	NA	NA	NA	NA	NA	NA	NA	NA	NA	NA	NA	NA	NA	NA	NA	NA	NA
GER_AP1E	GER_OSR_01_A	Apis mellifera	Germany	Oilseed rape	51.63268	57.19	161.368	17.993	2.618	0.996	4.2	11.39	NA	NA	NA	NA	NA	NA	NA	NA	NA	NA	NA	NA	NA	NA	NA	NA	NA	NA	NA	NA	NA	NA	NA	NA	NA	NA	NA	NA
GER_AP2A	GER_OSR_02_A	Apis mellifera	Germany	Oilseed rape	51.83384	58.98	275.018	37.827	3.512	1.302	7	3.05	NA	NA	NA	NA	NA	NA	NA	NA	NA	NA	NA	NA	NA	NA	NA	NA	NA	NA	NA	NA	NA	NA	NA	NA	NA	NA	NA	NA
GER_AP2B	GER_OSR_02_A	Apis mellifera	Germany	Oilseed rape	51.83384	58.98	275.018	37.827	3.512	1.302	7	2.29	NA	NA	NA	NA	NA	NA	NA	NA	NA	NA	NA	NA	NA	NA	NA	NA	NA	NA	NA	NA	NA	NA	NA	NA	NA	NA	NA	NA
GER_AP2C	GER_OSR_02_A	Apis mellifera	Germany	Oilseed rape	51.83384	58.98	275.018	37.827	3.512	1.302	7	6.76	NA	NA	NA	NA	NA	NA	NA	NA	NA	NA	NA	NA	NA	NA	NA	NA	NA	NA	NA	NA	NA	NA	NA	NA	NA	NA	NA	NA
GER_AP2D	GER_OSR_02_A	Apis mellifera	Germany	Oilseed rape	51.83384	58.98	275.018	37.827	3.512	1.302	7	2.51	NA	NA	NA	NA	NA	NA	NA	NA	NA	NA	NA	NA	NA	NA	NA	NA	NA	NA	NA	NA	NA	NA	NA	NA	NA	NA	NA	NA
GER_AP2E	GER_OSR_02_A	Apis mellifera	Germany	Oilseed rape	51.83384	58.98	275.018	37.827	3.512	1.302	7	4.48	NA	NA	NA	NA	NA	NA	NA	NA	NA	NA	NA	NA	NA	NA	NA	NA	NA	NA	NA	NA	NA	NA	NA	NA	NA	NA	NA	NA
GER_A3A	GER_OSR_03_A	Apis mellifera	Germany	Oilseed rape	52.08161	95.94	37.213	3.573	0.133	0.216	6.1	3.82	NA	NA	NA	NA	NA	NA	NA	NA	NA	NA	NA	NA	NA	NA	NA	NA	NA	NA	NA	NA	NA	NA	NA	NA	NA	NA	NA	NA
GER_AP3B	GER_OSR_03_A	Apis mellifera	Germany	Oilseed rape	52.08161	95.94	37.213	3.573	0.133	0.216	6.1	3.17	NA	NA	NA	NA	NA	NA	NA	NA	NA	NA	NA	NA	NA	NA	NA	NA	NA	NA	NA	NA	NA	NA	NA	NA	NA	NA	NA	NA
GER_AP3C	GER_OSR_03_A	Apis mellifera	Germany	Oilseed rape	52.08161	95.94	37.213	3.573	0.133	0.216	6.1	4.08	NA	NA	NA	NA	NA	NA	NA	NA	NA	NA	NA	NA	NA	NA	NA	NA	NA	NA	NA	NA	NA	NA	NA	NA	NA	NA	NA	NA
GER_AP3D	GER_OSR_03_A	Apis mellifera	Germany	Oilseed rape	52.08161	95.94	37.213	3.573	0.133	0.216	6.1	2.87	NA	NA	NA	NA	NA	NA	NA	NA	NA	NA	NA	NA	NA	NA	NA	NA	NA	NA	NA	NA	NA	NA	NA	NA	NA	NA	NA	NA
GER_AP3E	GER_OSR_03_A	Apis mellifera	Germany	Oilseed rape	52.08161	95.94	37.213	3.573	0.133	0.216	6.1	4.90	NA	NA	NA	NA	NA	NA	NA	NA	NA	NA	NA	NA	NA	NA	NA	NA	NA	NA	NA	NA	NA	NA	NA	NA	NA	NA	NA	NA
GER_AP4A	GER_OSR_04_A	Apis mellifera	Germany	Oilseed rape	52.04428	85.13	140.91	20.663	2.252	0.616	7.675	2.77	NA	NA	NA	NA	NA	NA	NA	NA	NA	NA	NA	NA	NA	NA	NA	NA	NA	NA	NA	NA	NA	NA	NA	NA	NA	NA	NA	NA
GER_AP4B	GER_OSR_04_A	Apis mellifera	Germany	Oilseed rape	52.04428	85.13	140.91	20.663	2.252	0.616	7.675	1.95	NA	NA	NA	NA	NA	NA	NA	NA	NA	NA	NA	NA	NA	NA	NA	NA	NA	NA	NA	NA	NA	NA	NA	NA	NA	NA	NA	NA
GER_AP4C	GER_OSR_04_A	Apis mellifera	Germany	Oilseed rape	52.04428	85.13	140.91	20.663	2.252	0.616	7.675	2.84	NA	NA	NA	NA	NA	NA	NA	NA	NA	NA	NA	NA	NA	NA	NA	NA	NA	NA	NA	NA	NA	NA	NA	NA	NA	NA	NA	NA
GER_AP4D	GER_OSR_04_A	Apis mellifera	Germany	Oilseed rape	52.04428	85.13	140.91	20.663	2.252	0.616	7.675	3.43	NA	NA	NA	NA	NA	NA	NA	NA	NA	NA	NA	NA	NA	NA	NA	NA	NA	NA	NA	NA	NA	NA	NA	NA	NA	NA	NA	NA
GER_AP4E	GER_OSR_04_A	Apis mellifera	Germany	Oilseed rape	52.04428	85.13	140.91	20.663	2.252	0.616	7.675	2.86	NA	NA	NA	NA	NA	NA	NA	NA	NA	NA	NA	NA	NA	NA	NA	NA	NA	NA	NA	NA	NA	NA	NA	NA	NA	NA	NA	NA
GER_AP5A	GER_OSR_05_A	Apis mellifera	Germany	Oilseed rape	51.55214	96.65	39.306	1.814	0.463	0.188	16.475	4.40	NA	NA	NA	NA	NA	NA	NA	NA	NA	NA	NA	NA	NA	NA	NA	NA	NA	NA	NA	NA	NA	NA	NA	NA	NA	NA	NA	NA
GER_AP5B	GER_OSR_05_A	Apis mellifera	Germany	Oilseed rape	51.55214	96.65	39.306	1.814	0.463	0.188	16.475	3.68	NA	NA	NA	NA	NA	NA	NA	NA	NA	NA	NA	NA	NA	NA	NA	NA	NA	NA	NA	NA	NA	NA	NA	NA	NA	NA	NA	NA
GER_AP5C	GER_OSR_05_A	Apis mellifera	Germany	Oilseed rape	51.55214	96.65	39.306	1.814	0.463	0.188	16.475	3.58	NA	NA	NA	NA	NA	NA	NA	NA	NA	NA	NA	NA	NA	NA	NA	NA	NA	NA	NA	NA	NA	NA	NA	NA	NA	NA	NA	NA
GER_AP5D	GER_OSR_05_A	Apis mellifera	Germany	Oilseed rape	51.55214	96.65	39.306	1.814	0.463	0.188	16.475	3.99	NA	NA	NA	NA	NA	NA	NA	NA	NA	NA	NA	NA	NA	NA	NA	NA	NA	NA	NA	NA	NA	NA	NA	NA	NA	NA	NA	NA
GER_AP5E	GER_OSR_05_A	Apis mellifera	Germany	Oilseed rape	51.55214	96.65	39.306	1.814	0.463	0.188	16.475	4.61	NA	NA	NA	NA	NA	NA	NA	NA	NA	NA	NA	NA	NA	NA	NA	NA	NA	NA	NA	NA	NA	NA	NA	NA	NA	NA	NA	NA
GER_AP6A	GER_OSR_06_A	Apis mellifera	Germany	Oilseed rape	51.63689	85.04	101.546	10.48	0.269	0.588	163.17	5.57	NA	NA	NA	NA	NA	NA	NA	NA	NA	NA	NA	NA	NA	NA	NA	NA	NA	NA	NA	NA	NA	NA	NA	NA	NA	NA	NA	NA
GER_AP6B	GER_OSR_06_A	Apis mellifera	Germany	Oilseed rape	51.63689	85.04	101.546	10.48	0.269	0.588	163.17	4.35	NA	NA	NA	NA	NA	NA	NA	NA	NA	NA	NA	NA	NA	NA	NA	NA	NA	NA	NA	NA	NA	NA	NA	NA	NA	NA	NA	NA
GER_AP6C	GER_OSR_06_A	Apis mellifera	Germany	Oilseed rape	51.63689	85.04	101.546	10.48	0.269	0.588	163.17	5.05	NA	NA	NA	NA	NA	NA	NA	NA	NA	NA	NA	NA	NA	NA	NA	NA	NA	NA	NA	NA	NA	NA	NA	NA	NA	NA	NA	NA
GER_AP6D	GER_OSR_06_A	Apis mellifera	Germany	Oilseed rape	51.63689	85.04	101.546	10.48	0.269	0.588	163.17	5.28	NA	NA	NA	NA	NA	NA	NA	NA	NA	NA	NA	NA	NA	NA	NA	NA	NA	NA	NA	NA	NA	NA	NA	NA	NA	NA	NA	NA
GER_AP6E	GER_OSR_06_A	Apis mellifera	Germany	Oilseed rape	51.63689	85.04	101.546	10.48	0.269	0.588	163.17	6.34	NA	NA	NA	NA	NA	NA	NA	NA	NA	NA	NA	NA	NA	NA	NA	NA	NA	NA	NA	NA	NA	NA	NA	NA	NA	NA	NA	NA
GER_AP7A	GER_OSR_07_A	Apis mellifera	Germany	Oilseed rape	51.46524	48.15	372.521	70.549	5.289	1.62	6.93	4.95	NA	NA	NA	NA	NA	NA	NA	NA	NA	NA	NA	NA	NA	NA	NA	NA	NA	NA	NA	NA	NA	NA	NA	NA	NA	NA	NA	NA
GER_AP7B	GER_OSR_07_A	Apis mellifera	Germany	Oilseed rape	51.46524	48.15	372.521	70.549	5.289	1.62	6.93	3.94	NA	NA	NA	NA	NA	NA	NA	NA	NA	NA	NA	NA	NA	NA	NA	NA	NA	NA	NA	NA	NA	NA	NA	NA	NA	NA	NA	NA
GER_AP7C	GER_OSR_07_A	Apis mellifera	Germany	Oilseed rape	51.46524	48.15	372.521	70.549	5.289	1.62	6.93	3.75	NA	NA	NA	NA	NA	NA	NA	NA	NA	NA	NA	NA	NA	NA	NA	NA	NA	NA	NA	NA	NA	NA	NA	NA	NA	NA	NA	NA
GER_AP7D	GER_OSR_07_A	Apis mellifera	Germany	Oilseed rape	51.46524	48.15	372.521	70.549	5.289	1.62	6.93	12.17	NA	NA	NA	NA	NA	NA	NA	NA	NA	NA	NA	NA	NA	NA	NA	NA	NA	NA	NA	NA	NA	NA	NA	NA	NA	NA	NA	NA
GER_AP7E	GER_OSR_07_A	Apis mellifera	Germany	Oilseed rape	51.46524	48.15	372.521	70.549	5.289	1.62	6.93	10.75	NA	NA	NA	NA	NA	NA	NA	NA	NA	NA	NA	NA	NA	NA	NA	NA	NA	NA	NA	NA	NA	NA	NA	NA	NA	NA	NA	NA
GER_AP8A	GER_OSR_08_A	Apis mellifera	Germany	Oilseed rape	52.06184	59.9	310.037	33.389	16.385	1.353	7.075	5.91	NA	NA	NA	NA	NA	NA	NA	NA	NA	NA	NA	NA	NA	NA	NA	NA	NA	NA	NA	NA	NA	NA	NA	NA	NA	NA	NA	NA
GER_AP8B	GER_OSR_08_A	Apis mellifera	Germany	Oilseed rape	52.06184	59.9	310.037	33.389	16.385	1.353	7.075	7.46	NA	NA	NA	NA	NA	NA	NA	NA	NA	NA	NA	NA	NA	NA	NA	NA	NA	NA	NA	NA	NA	NA	NA	NA	NA	NA	NA	NA
GER_AP8C	GER_OSR_08_A	Apis mellifera	Germany	Oilseed rape	52.06184	59.9	310.037	33.389	16.385	1.353	7.075	11.81	NA	NA	NA	NA	NA	NA	NA	NA	NA	NA	NA	NA	NA	NA	NA	NA	NA	NA	NA	NA	NA	NA	NA	NA	NA	NA	NA	NA
GER_AP8D	GER_OSR_08_A	Apis mellifera	Germany	Oilseed rape	52.06184	59.9	310.037	33.389	16.385	1.353	7.075	8.20	NA	NA	NA	NA	NA	NA	NA	NA	NA	NA	NA	NA	NA	NA	NA	NA	NA	NA	NA	NA	NA	NA	NA	NA	NA	NA	NA	NA
GER_AP8E	GER_OSR_08_A	Apis mellifera	Germany	Oilseed rape	52.06184	59.9	310.037	33.389	16.385	1.353	7.075	11.28	NA	NA	NA	NA	NA	NA	NA	NA	NA	NA	NA	NA	NA	NA	NA	NA	NA	NA	NA	NA	NA	NA	NA	NA	NA	NA	NA	NA
GER_B1A	GER_OSR_01_B	Bombus terrestris	Germany	Oilseed rape	51.63268	57.19	161.368	17.993	2.618	0.996	4.2	7.46	Propaquizafop	Lambda-cyhalothrin	Metazachlor	Boscalid	Dimoxystrobin	Mepiquat	Metconazole	Quizalofop-P	Tebuconazole	NA	NA	NA	NA	NA	NA	NA	NA	NA	NA	NA	NA	NA	NA	NA	NA	NA	NA	NA
GER_B1B	GER_OSR_01_B	Bombus terrestris	Germany	Oilseed rape	51.63268	57.19	161.368	17.993	2.618	0.996	4.2	11.92	Propaquizafop	Lambda-cyhalothrin	Metazachlor	Boscalid	Dimoxystrobin	Mepiquat	Metconazole	Quizalofop-P	Tebuconazole	NA	NA	NA	NA	NA	NA	NA	NA	NA	NA	NA	NA	NA	NA	NA	NA	NA	NA	NA
GER_B1C	GER_OSR_01_B	Bombus terrestris	Germany	Oilseed rape	51.63268	57.19	161.368	17.993	2.618	0.996	4.2	6.44	Propaquizafop	Lambda-cyhalothrin	Metazachlor	Boscalid	Dimoxystrobin	Mepiquat	Metconazole	Quizalofop-P	Tebuconazole	NA	NA	NA	NA	NA	NA	NA	NA	NA	NA	NA	NA	NA	NA	NA	NA	NA	NA	NA
GER_B1D	GER_OSR_01_B	Bombus terrestris	Germany	Oilseed rape	51.63268	57.19	161.368	17.993	2.618	0.996	4.2	7.98	Propaquizafop	Lambda-cyhalothrin	Metazachlor	Boscalid	Dimoxystrobin	Mepiquat	Metconazole	Quizalofop-P	Tebuconazole	NA	NA	NA	NA	NA	NA	NA	NA	NA	NA	NA	NA	NA	NA	NA	NA	NA	NA	NA
GER_B1E	GER_OSR_01_B	Bombus terrestris	Germany	Oilseed rape	51.63268	57.19	161.368	17.993	2.618	0.996	4.2	12.08	Propaquizafop	Lambda-cyhalothrin	Metazachlor	Boscalid	Dimoxystrobin	Mepiquat	Metconazole	Quizalofop-P	Tebuconazole	NA	NA	NA	NA	NA	NA	NA	NA	NA	NA	NA	NA	NA	NA	NA	NA	NA	NA	NA
GER_B2A	GER_OSR_02_B	Bombus terrestris	Germany	Oilseed rape	51.83384	58.98	275.018	37.827	3.512	1.302	7	13.93	Propaquizafop	Dimethenamid-P	Metazachlor	Quinmerac	Cypermethrin	Propyzamide	Quizalofop-P	Lambda-cyhalothrin	Etofenprox	NA	NA	NA	NA	NA	NA	NA	NA	NA	NA	NA	NA	NA	NA	NA	NA	NA	NA	NA
GER_B2B	GER_OSR_02_B	Bombus terrestris	Germany	Oilseed rape	51.83384	58.98	275.018	37.827	3.512	1.302	7	8.69	Propaquizafop	Dimethenamid-P	Metazachlor	Quinmerac	Cypermethrin	Propyzamide	Quizalofop-P	Lambda-cyhalothrin	Etofenprox	NA	NA	NA	NA	NA	NA	NA	NA	NA	NA	NA	NA	NA	NA	NA	NA	NA	NA	NA
GER_B2C	GER_OSR_02_B	Bombus terrestris	Germany	Oilseed rape	51.83384	58.98	275.018	37.827	3.512	1.302	7	9.06	Propaquizafop	Dimethenamid-P	Metazachlor	Quinmerac	Cypermethrin	Propyzamide	Quizalofop-P	Lambda-cyhalothrin	Etofenprox	NA	NA	NA	NA	NA	NA	NA	NA	NA	NA	NA	NA	NA	NA	NA	NA	NA	NA	NA
GER_B2D	GER_OSR_02_B	Bombus terrestris	Germany	Oilseed rape	51.83384	58.98	275.018	37.827	3.512	1.302	7	9.79	Propaquizafop	Dimethenamid-P	Metazachlor	Quinmerac	Cypermethrin	Propyzamide	Quizalofop-P	Lambda-cyhalothrin	Etofenprox	NA	NA	NA	NA	NA	NA	NA	NA	NA	NA	NA	NA	NA	NA	NA	NA	NA	NA	NA
GER_B2E	GER_OSR_02_B	Bombus terrestris	Germany	Oilseed rape	51.83384	58.98	275.018	37.827	3.512	1.302	7	10.76	Propaquizafop	Dimethenamid-P	Metazachlor	Quinmerac	Cypermethrin	Propyzamide	Quizalofop-P	Lambda-cyhalothrin	Etofenprox	NA	NA	NA	NA	NA	NA	NA	NA	NA	NA	NA	NA	NA	NA	NA	NA	NA	NA	NA
GER_B3A	GER_OSR_03_B	Bombus terrestris	Germany	Oilseed rape	52.08161	95.94	37.213	3.573	0.133	0.216	6.1	8.98	Lambda-cyhalothrin	Dimethenamid-P	Metazachlor	Quinmerac	Boscalid	Dimoxystrobin	Tebuconazole	Quizalofop-P	Etofenprox	NA	NA	NA	NA	NA	NA	NA	NA	NA	NA	NA	NA	NA	NA	NA	NA	NA	NA	NA
GER_B3B	GER_OSR_03_B	Bombus terrestris	Germany	Oilseed rape	52.08161	95.94	37.213	3.573	0.133	0.216	6.1	14.85	Lambda-cyhalothrin	Dimethenamid-P	Metazachlor	Quinmerac	Boscalid	Dimoxystrobin	Tebuconazole	Quizalofop-P	Etofenprox	NA	NA	NA	NA	NA	NA	NA	NA	NA	NA	NA	NA	NA	NA	NA	NA	NA	NA	NA
GER_B3C	GER_OSR_03_B	Bombus terrestris	Germany	Oilseed rape	52.08161	95.94	37.213	3.573	0.133	0.216	6.1	11.73	Lambda-cyhalothrin	Dimethenamid-P	Metazachlor	Quinmerac	Boscalid	Dimoxystrobin	Tebuconazole	Quizalofop-P	Etofenprox	NA	NA	NA	NA	NA	NA	NA	NA	NA	NA	NA	NA	NA	NA	NA	NA	NA	NA	NA
GER_B3D	GER_OSR_03_B	Bombus terrestris	Germany	Oilseed rape	52.08161	95.94	37.213	3.573	0.133	0.216	6.1	7.87	Lambda-cyhalothrin	Dimethenamid-P	Metazachlor	Quinmerac	Boscalid	Dimoxystrobin	Tebuconazole	Quizalofop-P	Etofenprox	NA	NA	NA	NA	NA	NA	NA	NA	NA	NA	NA	NA	NA	NA	NA	NA	NA	NA	NA
GER_B3E	GER_OSR_03_B	Bombus terrestris	Germany	Oilseed rape	52.08161	95.94	37.213	3.573	0.133	0.216	6.1	14.39	Lambda-cyhalothrin	Dimethenamid-P	Metazachlor	Quinmerac	Boscalid	Dimoxystrobin	Tebuconazole	Quizalofop-P	Etofenprox	NA	NA	NA	NA	NA	NA	NA	NA	NA	NA	NA	NA	NA	NA	NA	NA	NA	NA	NA
GER_B4A	GER_OSR_04_B	Bombus terrestris	Germany	Oilseed rape	52.04428	85.13	140.91	20.663	2.252	0.616	7.675	8.28	Lambda-cyhalothrin	Dimethenamid-P	Metazachlor	Metribuzin	Tebuconazole	Fluazifop-P	Tau-fluvalinate	Acetamiprid	Quizalofop-P	Prothioconazole	NA	NA	NA	NA	NA	NA	NA	NA	NA	NA	NA	NA	NA	NA	NA	NA	NA	NA
GER_B4B	GER_OSR_04_B	Bombus terrestris	Germany	Oilseed rape	52.04428	85.13	140.91	20.663	2.252	0.616	7.675	9.78	Lambda-cyhalothrin	Dimethenamid-P	Metazachlor	Metribuzin	Tebuconazole	Fluazifop-P	Tau-fluvalinate	Acetamiprid	Quizalofop-P	Prothioconazole	NA	NA	NA	NA	NA	NA	NA	NA	NA	NA	NA	NA	NA	NA	NA	NA	NA	NA
GER_B4C	GER_OSR_04_B	Bombus terrestris	Germany	Oilseed rape	52.04428	85.13	140.91	20.663	2.252	0.616	7.675	10.20	Lambda-cyhalothrin	Dimethenamid-P	Metazachlor	Metribuzin	Tebuconazole	Fluazifop-P	Tau-fluvalinate	Acetamiprid	Quizalofop-P	Prothioconazole	NA	NA	NA	NA	NA	NA	NA	NA	NA	NA	NA	NA	NA	NA	NA	NA	NA	NA
GER_B4D	GER_OSR_04_B	Bombus terrestris	Germany	Oilseed rape	52.04428	85.13	140.91	20.663	2.252	0.616	7.675	12.95	Lambda-cyhalothrin	Dimethenamid-P	Metazachlor	Metribuzin	Tebuconazole	Fluazifop-P	Tau-fluvalinate	Acetamiprid	Quizalofop-P	Prothioconazole	NA	NA	NA	NA	NA	NA	NA	NA	NA	NA	NA	NA	NA	NA	NA	NA	NA	NA
GER_B4E	GER_OSR_04_B	Bombus terrestris	Germany	Oilseed rape	52.04428	85.13	140.91	20.663	2.252	0.616	7.675	10.59	Lambda-cyhalothrin	Dimethenamid-P	Metazachlor	Metribuzin	Tebuconazole	Fluazifop-P	Tau-fluvalinate	Acetamiprid	Quizalofop-P	Prothioconazole	NA	NA	NA	NA	NA	NA	NA	NA	NA	NA	NA	NA	NA	NA	NA	NA	NA	NA
GER_B5A	GER_OSR_05_B	Bombus terrestris	Germany	Oilseed rape	51.55214	96.65	39.306	1.814	0.463	0.188	16.475	10.36	Dimethenamid-P	Metazachlor	Quinmerac	Clomazone	Dimethachlor	Napropamide	Quizalofop-P	Lambda-cyhalothrin	Etofenprox	NA	NA	NA	NA	NA	NA	NA	NA	NA	NA	NA	NA	NA	NA	NA	NA	NA	NA	NA
GER_B5B	GER_OSR_05_B	Bombus terrestris	Germany	Oilseed rape	51.55214	96.65	39.306	1.814	0.463	0.188	16.475	10.56	Dimethenamid-P	Metazachlor	Quinmerac	Clomazone	Dimethachlor	Napropamide	Quizalofop-P	Lambda-cyhalothrin	Etofenprox	NA	NA	NA	NA	NA	NA	NA	NA	NA	NA	NA	NA	NA	NA	NA	NA	NA	NA	NA
GER_B5C	GER_OSR_05_B	Bombus terrestris	Germany	Oilseed rape	51.55214	96.65	39.306	1.814	0.463	0.188	16.475	8.48	Dimethenamid-P	Metazachlor	Quinmerac	Clomazone	Dimethachlor	Napropamide	Quizalofop-P	Lambda-cyhalothrin	Etofenprox	NA	NA	NA	NA	NA	NA	NA	NA	NA	NA	NA	NA	NA	NA	NA	NA	NA	NA	NA
GER_B5D	GER_OSR_05_B	Bombus terrestris	Germany	Oilseed rape	51.55214	96.65	39.306	1.814	0.463	0.188	16.475	9.70	Dimethenamid-P	Metazachlor	Quinmerac	Clomazone	Dimethachlor	Napropamide	Quizalofop-P	Lambda-cyhalothrin	Etofenprox	NA	NA	NA	NA	NA	NA	NA	NA	NA	NA	NA	NA	NA	NA	NA	NA	NA	NA	NA
GER_B5E	GER_OSR_05_B	Bombus terrestris	Germany	Oilseed rape	51.55214	96.65	39.306	1.814	0.463	0.188	16.475	12.96	Dimethenamid-P	Metazachlor	Quinmerac	Clomazone	Dimethachlor	Napropamide	Quizalofop-P	Lambda-cyhalothrin	Etofenprox	NA	NA	NA	NA	NA	NA	NA	NA	NA	NA	NA	NA	NA	NA	NA	NA	NA	NA	NA
GER_B6A	GER_OSR_06_B	Bombus terrestris	Germany	Oilseed rape	51.63689	85.04	101.546	10.48	0.269	0.588	163.17	21.24	Azoxystrobin	Dimethenamid-P	Metazachlor	Quizalofop-P	Tebuconazole	Lambda-cyhalothrin	Etofenprox	Propaquizafop	NA	NA	NA	NA	NA	NA	NA	NA	NA	NA	NA	NA	NA	NA	NA	NA	NA	NA	NA	NA
GER_B6B	GER_OSR_06_B	Bombus terrestris	Germany	Oilseed rape	51.63689	85.04	101.546	10.48	0.269	0.588	163.17	10.56	Azoxystrobin	Dimethenamid-P	Metazachlor	Quizalofop-P	Tebuconazole	Lambda-cyhalothrin	Etofenprox	Propaquizafop	NA	NA	NA	NA	NA	NA	NA	NA	NA	NA	NA	NA	NA	NA	NA	NA	NA	NA	NA	NA
GER_B6C	GER_OSR_06_B	Bombus terrestris	Germany	Oilseed rape	51.63689	85.04	101.546	10.48	0.269	0.588	163.17	9.95	Azoxystrobin	Dimethenamid-P	Metazachlor	Quizalofop-P	Tebuconazole	Lambda-cyhalothrin	Etofenprox	Propaquizafop	NA	NA	NA	NA	NA	NA	NA	NA	NA	NA	NA	NA	NA	NA	NA	NA	NA	NA	NA	NA
GER_B6D	GER_OSR_06_B	Bombus terrestris	Germany	Oilseed rape	51.63689	85.04	101.546	10.48	0.269	0.588	163.17	8.64	Azoxystrobin	Dimethenamid-P	Metazachlor	Quizalofop-P	Tebuconazole	Lambda-cyhalothrin	Etofenprox	Propaquizafop	NA	NA	NA	NA	NA	NA	NA	NA	NA	NA	NA	NA	NA	NA	NA	NA	NA	NA	NA	NA
GER_B6E	GER_OSR_06_B	Bombus terrestris	Germany	Oilseed rape	51.63689	85.04	101.546	10.48	0.269	0.588	163.17	11.20	Azoxystrobin	Dimethenamid-P	Metazachlor	Quizalofop-P	Tebuconazole	Lambda-cyhalothrin	Etofenprox	Propaquizafop	NA	NA	NA	NA	NA	NA	NA	NA	NA	NA	NA	NA	NA	NA	NA	NA	NA	NA	NA	NA
GER_B7A	GER_OSR_07_B	Bombus terrestris	Germany	Oilseed rape	51.46524	48.15	372.521	70.549	5.289	1.62	6.93	6.16	Lambda-cyhalothrin	Dimethenamid-P	Metazachlor	Tebuconazole	Quizalofop-P	Etofenprox	NA	NA	NA	NA	NA	NA	NA	NA	NA	NA	NA	NA	NA	NA	NA	NA	NA	NA	NA	NA	NA	NA
GER_B7B	GER_OSR_07_B	Bombus terrestris	Germany	Oilseed rape	51.46524	48.15	372.521	70.549	5.289	1.62	6.93	8.74	Lambda-cyhalothrin	Dimethenamid-P	Metazachlor	Tebuconazole	Quizalofop-P	Etofenprox	NA	NA	NA	NA	NA	NA	NA	NA	NA	NA	NA	NA	NA	NA	NA	NA	NA	NA	NA	NA	NA	NA
GER_B7C	GER_OSR_07_B	Bombus terrestris	Germany	Oilseed rape	51.46524	48.15	372.521	70.549	5.289	1.62	6.93	9.17	Lambda-cyhalothrin	Dimethenamid-P	Metazachlor	Tebuconazole	Quizalofop-P	Etofenprox	NA	NA	NA	NA	NA	NA	NA	NA	NA	NA	NA	NA	NA	NA	NA	NA	NA	NA	NA	NA	NA	NA
GER_B7D	GER_OSR_07_B	Bombus terrestris	Germany	Oilseed rape	51.46524	48.15	372.521	70.549	5.289	1.62	6.93	11.56	Lambda-cyhalothrin	Dimethenamid-P	Metazachlor	Tebuconazole	Quizalofop-P	Etofenprox	NA	NA	NA	NA	NA	NA	NA	NA	NA	NA	NA	NA	NA	NA	NA	NA	NA	NA	NA	NA	NA	NA
GER_B7E	GER_OSR_07_B	Bombus terrestris	Germany	Oilseed rape	51.46524	48.15	372.521	70.549	5.289	1.62	6.93	7.97	Lambda-cyhalothrin	Dimethenamid-P	Metazachlor	Tebuconazole	Quizalofop-P	Etofenprox	NA	NA	NA	NA	NA	NA	NA	NA	NA	NA	NA	NA	NA	NA	NA	NA	NA	NA	NA	NA	NA	NA
GER_B8A	GER_OSR_08_B	Bombus terrestris	Germany	Oilseed rape	52.06184	59.9	310.037	33.389	16.385	1.353	7.075	8.22	Clomazone	Metazachlor	Alpha-cypermethrin	Tebuconazole	Quizalofop-P	Lambda-cyhalothrin	Propyzamide	Etofenprox	NA	NA	NA	NA	NA	NA	NA	NA	NA	NA	NA	NA	NA	NA	NA	NA	NA	NA	NA	NA
GER_B8B	GER_OSR_08_B	Bombus terrestris	Germany	Oilseed rape	52.06184	59.9	310.037	33.389	16.385	1.353	7.075	8.35	Clomazone	Metazachlor	Alpha-cypermethrin	Tebuconazole	Quizalofop-P	Lambda-cyhalothrin	Propyzamide	Etofenprox	NA	NA	NA	NA	NA	NA	NA	NA	NA	NA	NA	NA	NA	NA	NA	NA	NA	NA	NA	NA
GER_B8C	GER_OSR_08_B	Bombus terrestris	Germany	Oilseed rape	52.06184	59.9	310.037	33.389	16.385	1.353	7.075	8.66	Clomazone	Metazachlor	Alpha-cypermethrin	Tebuconazole	Quizalofop-P	Lambda-cyhalothrin	Propyzamide	Etofenprox	NA	NA	NA	NA	NA	NA	NA	NA	NA	NA	NA	NA	NA	NA	NA	NA	NA	NA	NA	NA
GER_B8D	GER_OSR_08_B	Bombus terrestris	Germany	Oilseed rape	52.06184	59.9	310.037	33.389	16.385	1.353	7.075	10.91	Clomazone	Metazachlor	Alpha-cypermethrin	Tebuconazole	Quizalofop-P	Lambda-cyhalothrin	Propyzamide	Etofenprox	NA	NA	NA	NA	NA	NA	NA	NA	NA	NA	NA	NA	NA	NA	NA	NA	NA	NA	NA	NA
GER_B8E	GER_OSR_08_B	Bombus terrestris	Germany	Oilseed rape	52.06184	59.9	310.037	33.389	16.385	1.353	7.075	12.71	Clomazone	Metazachlor	Alpha-cypermethrin	Tebuconazole	Quizalofop-P	Lambda-cyhalothrin	Propyzamide	Etofenprox	NA	NA	NA	NA	NA	NA	NA	NA	NA	NA	NA	NA	NA	NA	NA	NA	NA	NA	NA	NA
GER_B9A	GER_APP_09_B	Bombus terrestris	Germany	Apple	47.81172	48.15	288.574	65.496	6.898	1.52	25.45	6.97	Cydia pomonella granulovirus (CpGV) mexican isolate	Chlorantraniliprole	Dithianon	Captan	Pirimicarb	Myclobutanil	Penconazole	NA	NA	NA	NA	NA	NA	NA	NA	NA	NA	NA	NA	NA	NA	NA	NA	NA	NA	NA	NA	NA
GER_B9B	GER_APP_09_B	Bombus terrestris	Germany	Apple	47.81172	48.15	288.574	65.496	6.898	1.52	25.45	8.66	Cydia pomonella granulovirus (CpGV) mexican isolate	Chlorantraniliprole	Dithianon	Captan	Pirimicarb	Myclobutanil	Penconazole	NA	NA	NA	NA	NA	NA	NA	NA	NA	NA	NA	NA	NA	NA	NA	NA	NA	NA	NA	NA	NA
GER_B9C	GER_APP_09_B	Bombus terrestris	Germany	Apple	47.81172	48.15	288.574	65.496	6.898	1.52	25.45	10.74	Cydia pomonella granulovirus (CpGV) mexican isolate	Chlorantraniliprole	Dithianon	Captan	Pirimicarb	Myclobutanil	Penconazole	NA	NA	NA	NA	NA	NA	NA	NA	NA	NA	NA	NA	NA	NA	NA	NA	NA	NA	NA	NA	NA
GER_B9D	GER_APP_09_B	Bombus terrestris	Germany	Apple	47.81172	48.15	288.574	65.496	6.898	1.52	25.45	10.45	Cydia pomonella granulovirus (CpGV) mexican isolate	Chlorantraniliprole	Dithianon	Captan	Pirimicarb	Myclobutanil	Penconazole	NA	NA	NA	NA	NA	NA	NA	NA	NA	NA	NA	NA	NA	NA	NA	NA	NA	NA	NA	NA	NA
GER_B9E	GER_APP_09_B	Bombus terrestris	Germany	Apple	47.81172	48.15	288.574	65.496	6.898	1.52	25.45	11.11	Cydia pomonella granulovirus (CpGV) mexican isolate	Chlorantraniliprole	Dithianon	Captan	Pirimicarb	Myclobutanil	Penconazole	NA	NA	NA	NA	NA	NA	NA	NA	NA	NA	NA	NA	NA	NA	NA	NA	NA	NA	NA	NA	NA
GER_B10A	GER_APP_10_B	Bombus terrestris	Germany	Apple	47.67377	26.05	287.366	57.954	4.485	1.392	103.14	9.04	Dithianon	Copper hydroxide	Gibberellins (GA4/GA7)	6-Benzyladenine	Acequinocyl	Captan	Tebufenozide	Spirotetramat	Sulphur	Dodine	Flonicamid	NA	NA	NA	NA	NA	NA	NA	NA	NA	NA	NA	NA	NA	NA	NA	NA	NA
GER_B10B	GER_APP_10_B	Bombus terrestris	Germany	Apple	47.67377	26.05	287.366	57.954	4.485	1.392	103.14	9.77	Dithianon	Copper hydroxide	Gibberellins (GA4/GA7)	6-Benzyladenine	Acequinocyl	Captan	Tebufenozide	Spirotetramat	Sulphur	Dodine	Flonicamid	NA	NA	NA	NA	NA	NA	NA	NA	NA	NA	NA	NA	NA	NA	NA	NA	NA
GER_B10C	GER_APP_10_B	Bombus terrestris	Germany	Apple	47.67377	26.05	287.366	57.954	4.485	1.392	103.14	10.55	Dithianon	Copper hydroxide	Gibberellins (GA4/GA7)	6-Benzyladenine	Acequinocyl	Captan	Tebufenozide	Spirotetramat	Sulphur	Dodine	Flonicamid	NA	NA	NA	NA	NA	NA	NA	NA	NA	NA	NA	NA	NA	NA	NA	NA	NA
GER_B10D	GER_APP_10_B	Bombus terrestris	Germany	Apple	47.67377	26.05	287.366	57.954	4.485	1.392	103.14	12.33	Dithianon	Copper hydroxide	Gibberellins (GA4/GA7)	6-Benzyladenine	Acequinocyl	Captan	Tebufenozide	Spirotetramat	Sulphur	Dodine	Flonicamid	NA	NA	NA	NA	NA	NA	NA	NA	NA	NA	NA	NA	NA	NA	NA	NA	NA
GER_B10E	GER_APP_10_B	Bombus terrestris	Germany	Apple	47.67377	26.05	287.366	57.954	4.485	1.392	103.14	8.07	Dithianon	Copper hydroxide	Gibberellins (GA4/GA7)	6-Benzyladenine	Acequinocyl	Captan	Tebufenozide	Spirotetramat	Sulphur	Dodine	Flonicamid	NA	NA	NA	NA	NA	NA	NA	NA	NA	NA	NA	NA	NA	NA	NA	NA	NA
GER_B11A	GER_APP_11_B	Bombus terrestris	Germany	Apple	47.80418	43.15	332.253	123.787	18.621	1.532	12.52	7.64	Captan	Trifloxystrobin	Chlorantraniliprole	Dithianon	Pyrimethanil	Prohexadione	Cydia pomonella granulovirus (CpGV) isolate GV-0006	Acetamiprid	Sulphur	Pirimicarb	Paraffin oil	Indoxacarb	Penconazole	NA	NA	NA	NA	NA	NA	NA	NA	NA	NA	NA	NA	NA	NA	NA
GER_B11B	GER_APP_11_B	Bombus terrestris	Germany	Apple	47.80418	43.15	332.253	123.787	18.621	1.532	12.52	7.19	Captan	Trifloxystrobin	Chlorantraniliprole	Dithianon	Pyrimethanil	Prohexadione	Cydia pomonella granulovirus (CpGV) isolate GV-0006	Acetamiprid	Sulphur	Pirimicarb	Paraffin oil	Indoxacarb	Penconazole	NA	NA	NA	NA	NA	NA	NA	NA	NA	NA	NA	NA	NA	NA	NA
GER_B11C	GER_APP_11_B	Bombus terrestris	Germany	Apple	47.80418	43.15	332.253	123.787	18.621	1.532	12.52	11.21	Captan	Trifloxystrobin	Chlorantraniliprole	Dithianon	Pyrimethanil	Prohexadione	Cydia pomonella granulovirus (CpGV) isolate GV-0006	Acetamiprid	Sulphur	Pirimicarb	Paraffin oil	Indoxacarb	Penconazole	NA	NA	NA	NA	NA	NA	NA	NA	NA	NA	NA	NA	NA	NA	NA
GER_B11D	GER_APP_11_B	Bombus terrestris	Germany	Apple	47.80418	43.15	332.253	123.787	18.621	1.532	12.52	8.97	Captan	Trifloxystrobin	Chlorantraniliprole	Dithianon	Pyrimethanil	Prohexadione	Cydia pomonella granulovirus (CpGV) isolate GV-0006	Acetamiprid	Sulphur	Pirimicarb	Paraffin oil	Indoxacarb	Penconazole	NA	NA	NA	NA	NA	NA	NA	NA	NA	NA	NA	NA	NA	NA	NA
GER_B11E	GER_APP_11_B	Bombus terrestris	Germany	Apple	47.80418	43.15	332.253	123.787	18.621	1.532	12.52	11.54	Captan	Trifloxystrobin	Chlorantraniliprole	Dithianon	Pyrimethanil	Prohexadione	Cydia pomonella granulovirus (CpGV) isolate GV-0006	Acetamiprid	Sulphur	Pirimicarb	Paraffin oil	Indoxacarb	Penconazole	NA	NA	NA	NA	NA	NA	NA	NA	NA	NA	NA	NA	NA	NA	NA
GER_B12A	GER_APP_12_B	Bombus terrestris	Germany	Apple	47.67503	53.35	187.484	44.641	5.011	1.552	16.53	12.32	Captan	Trifloxystrobin	Chlorantraniliprole	Dithianon	Pyrimethanil	Trifloxystrobin	Copper hydroxide	Spirotetramat	Pirimicarb	Prohexadione	Fluxapyroxad	Dodine	Myclobutanil	Flonicamid	NA	NA	NA	NA	NA	NA	NA	NA	NA	NA	NA	NA	NA	NA
GER_B12B	GER_APP_12_B	Bombus terrestris	Germany	Apple	47.67503	53.35	187.484	44.641	5.011	1.552	16.53	11.73	Captan	Trifloxystrobin	Chlorantraniliprole	Dithianon	Pyrimethanil	Trifloxystrobin	Copper hydroxide	Spirotetramat	Pirimicarb	Prohexadione	Fluxapyroxad	Dodine	Myclobutanil	Flonicamid	NA	NA	NA	NA	NA	NA	NA	NA	NA	NA	NA	NA	NA	NA
GER_B12C	GER_APP_12_B	Bombus terrestris	Germany	Apple	47.67503	53.35	187.484	44.641	5.011	1.552	16.53	7.24	Captan	Trifloxystrobin	Chlorantraniliprole	Dithianon	Pyrimethanil	Trifloxystrobin	Copper hydroxide	Spirotetramat	Pirimicarb	Prohexadione	Fluxapyroxad	Dodine	Myclobutanil	Flonicamid	NA	NA	NA	NA	NA	NA	NA	NA	NA	NA	NA	NA	NA	NA
GER_B12D	GER_APP_12_B	Bombus terrestris	Germany	Apple	47.67503	53.35	187.484	44.641	5.011	1.552	16.53	11.17	Captan	Trifloxystrobin	Chlorantraniliprole	Dithianon	Pyrimethanil	Trifloxystrobin	Copper hydroxide	Spirotetramat	Pirimicarb	Prohexadione	Fluxapyroxad	Dodine	Myclobutanil	Flonicamid	NA	NA	NA	NA	NA	NA	NA	NA	NA	NA	NA	NA	NA	NA
GER_B12E	GER_APP_12_B	Bombus terrestris	Germany	Apple	47.67503	53.35	187.484	44.641	5.011	1.552	16.53	9.16	Captan	Trifloxystrobin	Chlorantraniliprole	Dithianon	Pyrimethanil	Trifloxystrobin	Copper hydroxide	Spirotetramat	Pirimicarb	Prohexadione	Fluxapyroxad	Dodine	Myclobutanil	Flonicamid	NA	NA	NA	NA	NA	NA	NA	NA	NA	NA	NA	NA	NA	NA
GER_B13A	GER_APP_13_B	Bombus terrestris	Germany	Apple	47.71712	38.02	288.156	85.461	9.66	1.572	21.74	10.14	Captan	Trifloxystrobin	Dithianon	Fluxapyroxad	Dodine	Flonicamid	NA	NA	NA	NA	NA	NA	NA	NA	NA	NA	NA	NA	NA	NA	NA	NA	NA	NA	NA	NA	NA	NA
GER_B13B	GER_APP_13_B	Bombus terrestris	Germany	Apple	47.71712	38.02	288.156	85.461	9.66	1.572	21.74	8.61	Captan	Trifloxystrobin	Dithianon	Fluxapyroxad	Dodine	Flonicamid	NA	NA	NA	NA	NA	NA	NA	NA	NA	NA	NA	NA	NA	NA	NA	NA	NA	NA	NA	NA	NA	NA
GER_B13C	GER_APP_13_B	Bombus terrestris	Germany	Apple	47.71712	38.02	288.156	85.461	9.66	1.572	21.74	9.70	Captan	Trifloxystrobin	Dithianon	Fluxapyroxad	Dodine	Flonicamid	NA	NA	NA	NA	NA	NA	NA	NA	NA	NA	NA	NA	NA	NA	NA	NA	NA	NA	NA	NA	NA	NA
GER_B13D	GER_APP_13_B	Bombus terrestris	Germany	Apple	47.71712	38.02	288.156	85.461	9.66	1.572	21.74	11.21	Captan	Trifloxystrobin	Dithianon	Fluxapyroxad	Dodine	Flonicamid	NA	NA	NA	NA	NA	NA	NA	NA	NA	NA	NA	NA	NA	NA	NA	NA	NA	NA	NA	NA	NA	NA
GER_B13E	GER_APP_13_B	Bombus terrestris	Germany	Apple	47.71712	38.02	288.156	85.461	9.66	1.572	21.74	12.17	Captan	Trifloxystrobin	Dithianon	Fluxapyroxad	Dodine	Flonicamid	NA	NA	NA	NA	NA	NA	NA	NA	NA	NA	NA	NA	NA	NA	NA	NA	NA	NA	NA	NA	NA	NA
GER_B14A	GER_APP_14_B	Bombus terrestris	Germany	Apple	47.69896	35.8	470.192	74.049	51.05	1.567	35.2	13.64	Copper hydroxide	Dithianon	6-Benzyladenine	Captan	Pirimicarb	Sulphur	Dodine	Myclobutanil	Penconazole	NA	NA	NA	NA	NA	NA	NA	NA	NA	NA	NA	NA	NA	NA	NA	NA	NA	NA	NA
GER_B14B	GER_APP_14_B	Bombus terrestris	Germany	Apple	47.69896	35.8	470.192	74.049	51.05	1.567	35.2	8.84	Copper hydroxide	Dithianon	6-Benzyladenine	Captan	Pirimicarb	Sulphur	Dodine	Myclobutanil	Penconazole	NA	NA	NA	NA	NA	NA	NA	NA	NA	NA	NA	NA	NA	NA	NA	NA	NA	NA	NA
GER_B14C	GER_APP_14_B	Bombus terrestris	Germany	Apple	47.69896	35.8	470.192	74.049	51.05	1.567	35.2	9.51	Copper hydroxide	Dithianon	6-Benzyladenine	Captan	Pirimicarb	Sulphur	Dodine	Myclobutanil	Penconazole	NA	NA	NA	NA	NA	NA	NA	NA	NA	NA	NA	NA	NA	NA	NA	NA	NA	NA	NA
GER_B14D	GER_APP_14_B	Bombus terrestris	Germany	Apple	47.69896	35.8	470.192	74.049	51.05	1.567	35.2	11.01	Copper hydroxide	Dithianon	6-Benzyladenine	Captan	Pirimicarb	Sulphur	Dodine	Myclobutanil	Penconazole	NA	NA	NA	NA	NA	NA	NA	NA	NA	NA	NA	NA	NA	NA	NA	NA	NA	NA	NA
GER_B14E	GER_APP_14_B	Bombus terrestris	Germany	Apple	47.69896	35.8	470.192	74.049	51.05	1.567	35.2	9.16	Copper hydroxide	Dithianon	6-Benzyladenine	Captan	Pirimicarb	Sulphur	Dodine	Myclobutanil	Penconazole	NA	NA	NA	NA	NA	NA	NA	NA	NA	NA	NA	NA	NA	NA	NA	NA	NA	NA	NA
GER_B15A	GER_APP_15_B	Bombus terrestris	Germany	Apple	47.73180	43.39	236.339	125.403	7.925	1.389	NA	6.70	NA	NA	NA	NA	NA	NA	NA	NA	NA	NA	NA	NA	NA	NA	NA	NA	NA	NA	NA	NA	NA	NA	NA	NA	NA	NA	NA	NA
GER_B15B	GER_APP_15_B	Bombus terrestris	Germany	Apple	47.73180	43.39	236.339	125.403	7.925	1.389	NA	5.24	NA	NA	NA	NA	NA	NA	NA	NA	NA	NA	NA	NA	NA	NA	NA	NA	NA	NA	NA	NA	NA	NA	NA	NA	NA	NA	NA	NA
GER_B15C	GER_APP_15_B	Bombus terrestris	Germany	Apple	47.73180	43.39	236.339	125.403	7.925	1.389	NA	11.83	NA	NA	NA	NA	NA	NA	NA	NA	NA	NA	NA	NA	NA	NA	NA	NA	NA	NA	NA	NA	NA	NA	NA	NA	NA	NA	NA	NA
GER_B15D	GER_APP_15_B	Bombus terrestris	Germany	Apple	47.73180	43.39	236.339	125.403	7.925	1.389	NA	10.60	NA	NA	NA	NA	NA	NA	NA	NA	NA	NA	NA	NA	NA	NA	NA	NA	NA	NA	NA	NA	NA	NA	NA	NA	NA	NA	NA	NA
GER_B15E	GER_APP_15_B	Bombus terrestris	Germany	Apple	47.73180	43.39	236.339	125.403	7.925	1.389	NA	8.51	NA	NA	NA	NA	NA	NA	NA	NA	NA	NA	NA	NA	NA	NA	NA	NA	NA	NA	NA	NA	NA	NA	NA	NA	NA	NA	NA	NA
GER_B16A	GER_APP_16_B	Bombus terrestris	Germany	Apple	47.70952	62.81	201.925	42.33	5.98	1.49	33.65	11.74	Cydia pomonella granulovirus (CpGV) isolate GV-R5	Captan	Trifloxystrobin	Copper hydroxide	Dithianon	Pyrimethanil	Tebufenozide	Pirimicarb	Prohexadione	Sulphur	Cyprodinil	Fludioxonil	Dodine	Flonicamid	NA	NA	NA	NA	NA	NA	NA	NA	NA	NA	NA	NA	NA	NA
GER_B16B	GER_APP_16_B	Bombus terrestris	Germany	Apple	47.70952	62.81	201.925	42.33	5.98	1.49	33.65	10.53	Cydia pomonella granulovirus (CpGV) isolate GV-R5	Captan	Trifloxystrobin	Copper hydroxide	Dithianon	Pyrimethanil	Tebufenozide	Pirimicarb	Prohexadione	Sulphur	Cyprodinil	Fludioxonil	Dodine	Flonicamid	NA	NA	NA	NA	NA	NA	NA	NA	NA	NA	NA	NA	NA	NA
GER_B16C	GER_APP_16_B	Bombus terrestris	Germany	Apple	47.70952	62.81	201.925	42.33	5.98	1.49	33.65	10.17	Cydia pomonella granulovirus (CpGV) isolate GV-R5	Captan	Trifloxystrobin	Copper hydroxide	Dithianon	Pyrimethanil	Tebufenozide	Pirimicarb	Prohexadione	Sulphur	Cyprodinil	Fludioxonil	Dodine	Flonicamid	NA	NA	NA	NA	NA	NA	NA	NA	NA	NA	NA	NA	NA	NA
GER_B16D	GER_APP_16_B	Bombus terrestris	Germany	Apple	47.70952	62.81	201.925	42.33	5.98	1.49	33.65	10.19	Cydia pomonella granulovirus (CpGV) isolate GV-R5	Captan	Trifloxystrobin	Copper hydroxide	Dithianon	Pyrimethanil	Tebufenozide	Pirimicarb	Prohexadione	Sulphur	Cyprodinil	Fludioxonil	Dodine	Flonicamid	NA	NA	NA	NA	NA	NA	NA	NA	NA	NA	NA	NA	NA	NA
GER_B16E	GER_APP_16_B	Bombus terrestris	Germany	Apple	47.70952	62.81	201.925	42.33	5.98	1.49	33.65	11.19	Cydia pomonella granulovirus (CpGV) isolate GV-R5	Captan	Trifloxystrobin	Copper hydroxide	Dithianon	Pyrimethanil	Tebufenozide	Pirimicarb	Prohexadione	Sulphur	Cyprodinil	Fludioxonil	Dodine	Flonicamid	NA	NA	NA	NA	NA	NA	NA	NA	NA	NA	NA	NA	NA	NA
ITA_AP1A	ITA_OSR_01_A	Apis mellifera	Italy	Oilseed rape	44.86844	56.59	300.569	55.155	30.067	1.325	2.7	6.89	Acetamiprid	Metazachlor	NA	NA	NA	NA	NA	NA	NA	NA	NA	NA	NA	NA	NA	NA	NA	NA	NA	NA	NA	NA	NA	NA	NA	NA	NA	NA
ITA_AP1B	ITA_OSR_01_A	Apis mellifera	Italy	Oilseed rape	44.86844	56.59	300.569	55.155	30.067	1.325	2.7	4.68	Acetamiprid	Metazachlor	NA	NA	NA	NA	NA	NA	NA	NA	NA	NA	NA	NA	NA	NA	NA	NA	NA	NA	NA	NA	NA	NA	NA	NA	NA	NA
ITA_AP1C	ITA_OSR_01_A	Apis mellifera	Italy	Oilseed rape	44.86844	56.59	300.569	55.155	30.067	1.325	2.7	10.34	Acetamiprid	Metazachlor	NA	NA	NA	NA	NA	NA	NA	NA	NA	NA	NA	NA	NA	NA	NA	NA	NA	NA	NA	NA	NA	NA	NA	NA	NA	NA
ITA_AP1D	ITA_OSR_01_A	Apis mellifera	Italy	Oilseed rape	44.86844	56.59	300.569	55.155	30.067	1.325	2.7	5.69	Acetamiprid	Metazachlor	NA	NA	NA	NA	NA	NA	NA	NA	NA	NA	NA	NA	NA	NA	NA	NA	NA	NA	NA	NA	NA	NA	NA	NA	NA	NA
ITA_AP1E	ITA_OSR_01_A	Apis mellifera	Italy	Oilseed rape	44.86844	56.59	300.569	55.155	30.067	1.325	2.7	6.48	Acetamiprid	Metazachlor	NA	NA	NA	NA	NA	NA	NA	NA	NA	NA	NA	NA	NA	NA	NA	NA	NA	NA	NA	NA	NA	NA	NA	NA	NA	NA
ITA_AP2A	ITA_OSR_02_A	Apis mellifera	Italy	Oilseed rape	44.93393	86.18	157.926	16.261	2.52	0.644	NA	13.97	NA	NA	NA	NA	NA	NA	NA	NA	NA	NA	NA	NA	NA	NA	NA	NA	NA	NA	NA	NA	NA	NA	NA	NA	NA	NA	NA	NA
ITA_AP2B	ITA_OSR_02_A	Apis mellifera	Italy	Oilseed rape	44.93393	86.18	157.926	16.261	2.52	0.644	NA	7.35	NA	NA	NA	NA	NA	NA	NA	NA	NA	NA	NA	NA	NA	NA	NA	NA	NA	NA	NA	NA	NA	NA	NA	NA	NA	NA	NA	NA
ITA_AP2C	ITA_OSR_02_A	Apis mellifera	Italy	Oilseed rape	44.93393	86.18	157.926	16.261	2.52	0.644	NA	10.80	NA	NA	NA	NA	NA	NA	NA	NA	NA	NA	NA	NA	NA	NA	NA	NA	NA	NA	NA	NA	NA	NA	NA	NA	NA	NA	NA	NA
ITA_AP2D	ITA_OSR_02_A	Apis mellifera	Italy	Oilseed rape	44.93393	86.18	157.926	16.261	2.52	0.644	NA	15.13	NA	NA	NA	NA	NA	NA	NA	NA	NA	NA	NA	NA	NA	NA	NA	NA	NA	NA	NA	NA	NA	NA	NA	NA	NA	NA	NA	NA
ITA_AP2E	ITA_OSR_02_A	Apis mellifera	Italy	Oilseed rape	44.93393	86.18	157.926	16.261	2.52	0.644	NA	14.42	NA	NA	NA	NA	NA	NA	NA	NA	NA	NA	NA	NA	NA	NA	NA	NA	NA	NA	NA	NA	NA	NA	NA	NA	NA	NA	NA	NA
ITA_A3A	ITA_OSR_03_A	Apis mellifera	Italy	Oilseed rape	45.01754	67.55	234.494	54.276	1.032	1.328	NA	9.58	NA	NA	NA	NA	NA	NA	NA	NA	NA	NA	NA	NA	NA	NA	NA	NA	NA	NA	NA	NA	NA	NA	NA	NA	NA	NA	NA	NA
ITA_AP3B	ITA_OSR_03_A	Apis mellifera	Italy	Oilseed rape	45.01754	67.55	234.494	54.276	1.032	1.328	NA	11.02	NA	NA	NA	NA	NA	NA	NA	NA	NA	NA	NA	NA	NA	NA	NA	NA	NA	NA	NA	NA	NA	NA	NA	NA	NA	NA	NA	NA
ITA_AP3C	ITA_OSR_03_A	Apis mellifera	Italy	Oilseed rape	45.01754	67.55	234.494	54.276	1.032	1.328	NA	10.90	NA	NA	NA	NA	NA	NA	NA	NA	NA	NA	NA	NA	NA	NA	NA	NA	NA	NA	NA	NA	NA	NA	NA	NA	NA	NA	NA	NA
ITA_AP3D	ITA_OSR_03_A	Apis mellifera	Italy	Oilseed rape	45.01754	67.55	234.494	54.276	1.032	1.328	NA	13.73	NA	NA	NA	NA	NA	NA	NA	NA	NA	NA	NA	NA	NA	NA	NA	NA	NA	NA	NA	NA	NA	NA	NA	NA	NA	NA	NA	NA
ITA_AP3E	ITA_OSR_03_A	Apis mellifera	Italy	Oilseed rape	45.01754	67.55	234.494	54.276	1.032	1.328	NA	20.73	NA	NA	NA	NA	NA	NA	NA	NA	NA	NA	NA	NA	NA	NA	NA	NA	NA	NA	NA	NA	NA	NA	NA	NA	NA	NA	NA	NA
ITA_AP4A	ITA_OSR_04_A	Apis mellifera	Italy	Oilseed rape	44.88203	79.63	150.873	18.695	1.986	1.082	NA	8.55	NA	NA	NA	NA	NA	NA	NA	NA	NA	NA	NA	NA	NA	NA	NA	NA	NA	NA	NA	NA	NA	NA	NA	NA	NA	NA	NA	NA
ITA_AP4B	ITA_OSR_04_A	Apis mellifera	Italy	Oilseed rape	44.88203	79.63	150.873	18.695	1.986	1.082	NA	11.95	NA	NA	NA	NA	NA	NA	NA	NA	NA	NA	NA	NA	NA	NA	NA	NA	NA	NA	NA	NA	NA	NA	NA	NA	NA	NA	NA	NA
ITA_AP4C	ITA_OSR_04_A	Apis mellifera	Italy	Oilseed rape	44.88203	79.63	150.873	18.695	1.986	1.082	NA	13.48	NA	NA	NA	NA	NA	NA	NA	NA	NA	NA	NA	NA	NA	NA	NA	NA	NA	NA	NA	NA	NA	NA	NA	NA	NA	NA	NA	NA
ITA_AP4D	ITA_OSR_04_A	Apis mellifera	Italy	Oilseed rape	44.88203	79.63	150.873	18.695	1.986	1.082	NA	15.29	NA	NA	NA	NA	NA	NA	NA	NA	NA	NA	NA	NA	NA	NA	NA	NA	NA	NA	NA	NA	NA	NA	NA	NA	NA	NA	NA	NA
ITA_AP4E	ITA_OSR_04_A	Apis mellifera	Italy	Oilseed rape	44.88203	79.63	150.873	18.695	1.986	1.082	NA	15.35	NA	NA	NA	NA	NA	NA	NA	NA	NA	NA	NA	NA	NA	NA	NA	NA	NA	NA	NA	NA	NA	NA	NA	NA	NA	NA	NA	NA
ITA_AP5A	ITA_OSR_05_A	Apis mellifera	Italy	Oilseed rape	44.96752	69.85	221.761	56.241	2.67	1.286	1.8	11.28	Deltamethrin	Metazachlor	NA	NA	NA	NA	NA	NA	NA	NA	NA	NA	NA	NA	NA	NA	NA	NA	NA	NA	NA	NA	NA	NA	NA	NA	NA	NA
ITA_AP5B	ITA_OSR_05_A	Apis mellifera	Italy	Oilseed rape	44.96752	69.85	221.761	56.241	2.67	1.286	1.8	17.90	Deltamethrin	Metazachlor	NA	NA	NA	NA	NA	NA	NA	NA	NA	NA	NA	NA	NA	NA	NA	NA	NA	NA	NA	NA	NA	NA	NA	NA	NA	NA
ITA_AP5C	ITA_OSR_05_A	Apis mellifera	Italy	Oilseed rape	44.96752	69.85	221.761	56.241	2.67	1.286	1.8	7.92	Deltamethrin	Metazachlor	NA	NA	NA	NA	NA	NA	NA	NA	NA	NA	NA	NA	NA	NA	NA	NA	NA	NA	NA	NA	NA	NA	NA	NA	NA	NA
ITA_AP5D	ITA_OSR_05_A	Apis mellifera	Italy	Oilseed rape	44.96752	69.85	221.761	56.241	2.67	1.286	1.8	8.96	Deltamethrin	Metazachlor	NA	NA	NA	NA	NA	NA	NA	NA	NA	NA	NA	NA	NA	NA	NA	NA	NA	NA	NA	NA	NA	NA	NA	NA	NA	NA
ITA_AP5E	ITA_OSR_05_A	Apis mellifera	Italy	Oilseed rape	44.96752	69.85	221.761	56.241	2.67	1.286	1.8	16.49	Deltamethrin	Metazachlor	NA	NA	NA	NA	NA	NA	NA	NA	NA	NA	NA	NA	NA	NA	NA	NA	NA	NA	NA	NA	NA	NA	NA	NA	NA	NA
ITA_AP6A	ITA_OSR_06_A	Apis mellifera	Italy	Oilseed rape	45.00762	61.59	290.068	53.692	4.8	1.323	NA	3.69	NA	NA	NA	NA	NA	NA	NA	NA	NA	NA	NA	NA	NA	NA	NA	NA	NA	NA	NA	NA	NA	NA	NA	NA	NA	NA	NA	NA
ITA_AP6B	ITA_OSR_06_A	Apis mellifera	Italy	Oilseed rape	45.00762	61.59	290.068	53.692	4.8	1.323	NA	10.69	NA	NA	NA	NA	NA	NA	NA	NA	NA	NA	NA	NA	NA	NA	NA	NA	NA	NA	NA	NA	NA	NA	NA	NA	NA	NA	NA	NA
ITA_AP6C	ITA_OSR_06_A	Apis mellifera	Italy	Oilseed rape	45.00762	61.59	290.068	53.692	4.8	1.323	NA	14.58	NA	NA	NA	NA	NA	NA	NA	NA	NA	NA	NA	NA	NA	NA	NA	NA	NA	NA	NA	NA	NA	NA	NA	NA	NA	NA	NA	NA
ITA_AP6D	ITA_OSR_06_A	Apis mellifera	Italy	Oilseed rape	45.00762	61.59	290.068	53.692	4.8	1.323	NA	5.64	NA	NA	NA	NA	NA	NA	NA	NA	NA	NA	NA	NA	NA	NA	NA	NA	NA	NA	NA	NA	NA	NA	NA	NA	NA	NA	NA	NA
ITA_AP6E	ITA_OSR_06_A	Apis mellifera	Italy	Oilseed rape	45.00762	61.59	290.068	53.692	4.8	1.323	NA	6.15	NA	NA	NA	NA	NA	NA	NA	NA	NA	NA	NA	NA	NA	NA	NA	NA	NA	NA	NA	NA	NA	NA	NA	NA	NA	NA	NA	NA
ITA_AP7A	ITA_OSR_07_A	Apis mellifera	Italy	Oilseed rape	44.90287	53.59	363.464	52.872	6.625	1.382	NA	12.50	NA	NA	NA	NA	NA	NA	NA	NA	NA	NA	NA	NA	NA	NA	NA	NA	NA	NA	NA	NA	NA	NA	NA	NA	NA	NA	NA	NA
ITA_AP7B	ITA_OSR_07_A	Apis mellifera	Italy	Oilseed rape	44.90287	53.59	363.464	52.872	6.625	1.382	NA	18.93	NA	NA	NA	NA	NA	NA	NA	NA	NA	NA	NA	NA	NA	NA	NA	NA	NA	NA	NA	NA	NA	NA	NA	NA	NA	NA	NA	NA
ITA_AP7C	ITA_OSR_07_A	Apis mellifera	Italy	Oilseed rape	44.90287	53.59	363.464	52.872	6.625	1.382	NA	21.48	NA	NA	NA	NA	NA	NA	NA	NA	NA	NA	NA	NA	NA	NA	NA	NA	NA	NA	NA	NA	NA	NA	NA	NA	NA	NA	NA	NA
ITA_AP7D	ITA_OSR_07_A	Apis mellifera	Italy	Oilseed rape	44.90287	53.59	363.464	52.872	6.625	1.382	NA	12.20	NA	NA	NA	NA	NA	NA	NA	NA	NA	NA	NA	NA	NA	NA	NA	NA	NA	NA	NA	NA	NA	NA	NA	NA	NA	NA	NA	NA
ITA_AP7E	ITA_OSR_07_A	Apis mellifera	Italy	Oilseed rape	44.90287	53.59	363.464	52.872	6.625	1.382	NA	15.82	NA	NA	NA	NA	NA	NA	NA	NA	NA	NA	NA	NA	NA	NA	NA	NA	NA	NA	NA	NA	NA	NA	NA	NA	NA	NA	NA	NA
ITA_AP8A	ITA_OSR_08_A	Apis mellifera	Italy	Oilseed rape	44.91454	66.43	317.694	49.62	16.269	1.207	NA	13.73	NA	NA	NA	NA	NA	NA	NA	NA	NA	NA	NA	NA	NA	NA	NA	NA	NA	NA	NA	NA	NA	NA	NA	NA	NA	NA	NA	NA
ITA_AP8B	ITA_OSR_08_A	Apis mellifera	Italy	Oilseed rape	44.91454	66.43	317.694	49.62	16.269	1.207	NA	6.64	NA	NA	NA	NA	NA	NA	NA	NA	NA	NA	NA	NA	NA	NA	NA	NA	NA	NA	NA	NA	NA	NA	NA	NA	NA	NA	NA	NA
ITA_AP8C	ITA_OSR_08_A	Apis mellifera	Italy	Oilseed rape	44.91454	66.43	317.694	49.62	16.269	1.207	NA	4.61	NA	NA	NA	NA	NA	NA	NA	NA	NA	NA	NA	NA	NA	NA	NA	NA	NA	NA	NA	NA	NA	NA	NA	NA	NA	NA	NA	NA
ITA_AP8D	ITA_OSR_08_A	Apis mellifera	Italy	Oilseed rape	44.91454	66.43	317.694	49.62	16.269	1.207	NA	10.48	NA	NA	NA	NA	NA	NA	NA	NA	NA	NA	NA	NA	NA	NA	NA	NA	NA	NA	NA	NA	NA	NA	NA	NA	NA	NA	NA	NA
ITA_AP8E	ITA_OSR_08_A	Apis mellifera	Italy	Oilseed rape	44.91454	66.43	317.694	49.62	16.269	1.207	NA	5.65	NA	NA	NA	NA	NA	NA	NA	NA	NA	NA	NA	NA	NA	NA	NA	NA	NA	NA	NA	NA	NA	NA	NA	NA	NA	NA	NA	NA
ITA_AP9A	ITA_APP_09_A	Apis mellifera	Italy	Apple	46.28927	65.98	66.527	2.991	5.501	0.971	32.16	10.45	Calcium polysulfide	Sulphur	Azadirachtin	Copper sulphate	NA	NA	NA	NA	NA	NA	NA	NA	NA	NA	NA	NA	NA	NA	NA	NA	NA	NA	NA	NA	NA	NA	NA	NA
ITA_AP9B	ITA_APP_09_A	Apis mellifera	Italy	Apple	46.28927	65.98	66.527	2.991	5.501	0.971	32.16	18.31	Calcium polysulfide	Sulphur	Azadirachtin	Copper sulphate	NA	NA	NA	NA	NA	NA	NA	NA	NA	NA	NA	NA	NA	NA	NA	NA	NA	NA	NA	NA	NA	NA	NA	NA
ITA_AP9C	ITA_APP_09_A	Apis mellifera	Italy	Apple	46.28927	65.98	66.527	2.991	5.501	0.971	32.16	14.05	Calcium polysulfide	Sulphur	Azadirachtin	Copper sulphate	NA	NA	NA	NA	NA	NA	NA	NA	NA	NA	NA	NA	NA	NA	NA	NA	NA	NA	NA	NA	NA	NA	NA	NA
ITA_AP9D	ITA_APP_09_A	Apis mellifera	Italy	Apple	46.28927	65.98	66.527	2.991	5.501	0.971	32.16	12.75	Calcium polysulfide	Sulphur	Azadirachtin	Copper sulphate	NA	NA	NA	NA	NA	NA	NA	NA	NA	NA	NA	NA	NA	NA	NA	NA	NA	NA	NA	NA	NA	NA	NA	NA
ITA_AP9E	ITA_APP_09_A	Apis mellifera	Italy	Apple	46.28927	65.98	66.527	2.991	5.501	0.971	32.16	19.23	Calcium polysulfide	Sulphur	Azadirachtin	Copper sulphate	NA	NA	NA	NA	NA	NA	NA	NA	NA	NA	NA	NA	NA	NA	NA	NA	NA	NA	NA	NA	NA	NA	NA	NA
ITA_AP10A	ITA_APP_10_A	Apis mellifera	Italy	Apple	46.02610	10.93	385.158	45.441	13.74	1.486	28.93	15.38	Calcium polysulfide	Azadirachtin	Sulphur	NA	NA	NA	NA	NA	NA	NA	NA	NA	NA	NA	NA	NA	NA	NA	NA	NA	NA	NA	NA	NA	NA	NA	NA	NA
ITA_AP10B	ITA_APP_10_A	Apis mellifera	Italy	Apple	46.02610	10.93	385.158	45.441	13.74	1.486	28.93	9.59	Calcium polysulfide	Azadirachtin	Sulphur	NA	NA	NA	NA	NA	NA	NA	NA	NA	NA	NA	NA	NA	NA	NA	NA	NA	NA	NA	NA	NA	NA	NA	NA	NA
ITA_AP10C	ITA_APP_10_A	Apis mellifera	Italy	Apple	46.02610	10.93	385.158	45.441	13.74	1.486	28.93	17.58	Calcium polysulfide	Azadirachtin	Sulphur	NA	NA	NA	NA	NA	NA	NA	NA	NA	NA	NA	NA	NA	NA	NA	NA	NA	NA	NA	NA	NA	NA	NA	NA	NA
ITA_AP10D	ITA_APP_10_A	Apis mellifera	Italy	Apple	46.02610	10.93	385.158	45.441	13.74	1.486	28.93	22.88	Calcium polysulfide	Azadirachtin	Sulphur	NA	NA	NA	NA	NA	NA	NA	NA	NA	NA	NA	NA	NA	NA	NA	NA	NA	NA	NA	NA	NA	NA	NA	NA	NA
ITA_AP10E	ITA_APP_10_A	Apis mellifera	Italy	Apple	46.02610	10.93	385.158	45.441	13.74	1.486	28.93	23.26	Calcium polysulfide	Azadirachtin	Sulphur	NA	NA	NA	NA	NA	NA	NA	NA	NA	NA	NA	NA	NA	NA	NA	NA	NA	NA	NA	NA	NA	NA	NA	NA	NA
ITA_AP11A	ITA_APP_11_A	Apis mellifera	Italy	Apple	46.01578	43.6	274.38	56.319	14.484	1.492	100.23	5.74	Calcium polysulfide	Azadirachtin	Copper sulphate	Sulphur	NA	NA	NA	NA	NA	NA	NA	NA	NA	NA	NA	NA	NA	NA	NA	NA	NA	NA	NA	NA	NA	NA	NA	NA
ITA_AP11B	ITA_APP_11_A	Apis mellifera	Italy	Apple	46.01578	43.6	274.38	56.319	14.484	1.492	100.23	11.76	Calcium polysulfide	Azadirachtin	Copper sulphate	Sulphur	NA	NA	NA	NA	NA	NA	NA	NA	NA	NA	NA	NA	NA	NA	NA	NA	NA	NA	NA	NA	NA	NA	NA	NA
ITA_AP11C	ITA_APP_11_A	Apis mellifera	Italy	Apple	46.01578	43.6	274.38	56.319	14.484	1.492	100.23	7.98	Calcium polysulfide	Azadirachtin	Copper sulphate	Sulphur	NA	NA	NA	NA	NA	NA	NA	NA	NA	NA	NA	NA	NA	NA	NA	NA	NA	NA	NA	NA	NA	NA	NA	NA
ITA_AP11D	ITA_APP_11_A	Apis mellifera	Italy	Apple	46.01578	43.6	274.38	56.319	14.484	1.492	100.23	15.97	Calcium polysulfide	Azadirachtin	Copper sulphate	Sulphur	NA	NA	NA	NA	NA	NA	NA	NA	NA	NA	NA	NA	NA	NA	NA	NA	NA	NA	NA	NA	NA	NA	NA	NA
ITA_AP11E	ITA_APP_11_A	Apis mellifera	Italy	Apple	46.01578	43.6	274.38	56.319	14.484	1.492	100.23	15.13	Calcium polysulfide	Azadirachtin	Copper sulphate	Sulphur	NA	NA	NA	NA	NA	NA	NA	NA	NA	NA	NA	NA	NA	NA	NA	NA	NA	NA	NA	NA	NA	NA	NA	NA
ITA_AP12A	ITA_APP_12_A	Apis mellifera	Italy	Apple	46.16120	51.29	206.563	9.652	4.139	1.034	150.45	13.61	Calcium polysulfide	Azadirachtin	Paraffin Oil	Sulphur	NA	NA	NA	NA	NA	NA	NA	NA	NA	NA	NA	NA	NA	NA	NA	NA	NA	NA	NA	NA	NA	NA	NA	NA
ITA_AP12B	ITA_APP_12_A	Apis mellifera	Italy	Apple	46.16120	51.29	206.563	9.652	4.139	1.034	150.45	18.64	Calcium polysulfide	Azadirachtin	Paraffin Oil	Sulphur	NA	NA	NA	NA	NA	NA	NA	NA	NA	NA	NA	NA	NA	NA	NA	NA	NA	NA	NA	NA	NA	NA	NA	NA
ITA_AP12C	ITA_APP_12_A	Apis mellifera	Italy	Apple	46.16120	51.29	206.563	9.652	4.139	1.034	150.45	20.15	Calcium polysulfide	Azadirachtin	Paraffin Oil	Sulphur	NA	NA	NA	NA	NA	NA	NA	NA	NA	NA	NA	NA	NA	NA	NA	NA	NA	NA	NA	NA	NA	NA	NA	NA
ITA_AP12D	ITA_APP_12_A	Apis mellifera	Italy	Apple	46.16120	51.29	206.563	9.652	4.139	1.034	150.45	12.85	Calcium polysulfide	Azadirachtin	Paraffin Oil	Sulphur	NA	NA	NA	NA	NA	NA	NA	NA	NA	NA	NA	NA	NA	NA	NA	NA	NA	NA	NA	NA	NA	NA	NA	NA
ITA_AP12E	ITA_APP_12_A	Apis mellifera	Italy	Apple	46.16120	51.29	206.563	9.652	4.139	1.034	150.45	21.43	Calcium polysulfide	Azadirachtin	Paraffin Oil	Sulphur	NA	NA	NA	NA	NA	NA	NA	NA	NA	NA	NA	NA	NA	NA	NA	NA	NA	NA	NA	NA	NA	NA	NA	NA
ITA_AP13A	ITA_APP_13_A	Apis mellifera	Italy	Apple	46.44328	34.01	226.066	31.727	3.93	1.184	20.83	21.05	1-Naphthaleneacetamide	Copper oxychloride	Diathianon	Acetamiprid	Penthiopyrad	Methiocarb	Metiram	6-benzyladenine	Fluxapyroxad	Phosmet	Dodine	Flonicamid	Penconazole	NA	NA	NA	NA	NA	NA	NA	NA	NA	NA	NA	NA	NA	NA	NA
ITA_AP13B	ITA_APP_13_A	Apis mellifera	Italy	Apple	46.44328	34.01	226.066	31.727	3.93	1.184	20.83	13.91	1-Naphthaleneacetamide	Copper oxychloride	Diathianon	Acetamiprid	Penthiopyrad	Methiocarb	Metiram	6-benzyladenine	Fluxapyroxad	Phosmet	Dodine	Flonicamid	Penconazole	NA	NA	NA	NA	NA	NA	NA	NA	NA	NA	NA	NA	NA	NA	NA
ITA_AP13C	ITA_APP_13_A	Apis mellifera	Italy	Apple	46.44328	34.01	226.066	31.727	3.93	1.184	20.83	12.93	1-Naphthaleneacetamide	Copper oxychloride	Diathianon	Acetamiprid	Penthiopyrad	Methiocarb	Metiram	6-benzyladenine	Fluxapyroxad	Phosmet	Dodine	Flonicamid	Penconazole	NA	NA	NA	NA	NA	NA	NA	NA	NA	NA	NA	NA	NA	NA	NA
ITA_AP13D	ITA_APP_13_A	Apis mellifera	Italy	Apple	46.44328	34.01	226.066	31.727	3.93	1.184	20.83	7.56	1-Naphthaleneacetamide	Copper oxychloride	Diathianon	Acetamiprid	Penthiopyrad	Methiocarb	Metiram	6-benzyladenine	Fluxapyroxad	Phosmet	Dodine	Flonicamid	Penconazole	NA	NA	NA	NA	NA	NA	NA	NA	NA	NA	NA	NA	NA	NA	NA
ITA_AP13E	ITA_APP_13_A	Apis mellifera	Italy	Apple	46.44328	34.01	226.066	31.727	3.93	1.184	20.83	17.45	1-Naphthaleneacetamide	Copper oxychloride	Diathianon	Acetamiprid	Penthiopyrad	Methiocarb	Metiram	6-benzyladenine	Fluxapyroxad	Phosmet	Dodine	Flonicamid	Penconazole	NA	NA	NA	NA	NA	NA	NA	NA	NA	NA	NA	NA	NA	NA	NA
ITA_AP14A	ITA_APP_14_A	Apis mellifera	Italy	Apple	46.36419	23.27	313.593	33.448	21.472	1.323	11.83	14.52	Sulfoxaflor	Diathianon	2-methyl-4-chlorophenoxyacetic acid	Methiocarb	Metiram	6-benzyladenine	Dodine	Glyphosate	Flonicamid	Etofenprox	NA	NA	NA	NA	NA	NA	NA	NA	NA	NA	NA	NA	NA	NA	NA	NA	NA	NA
ITA_AP14B	ITA_APP_14_A	Apis mellifera	Italy	Apple	46.36419	23.27	313.593	33.448	21.472	1.323	11.83	13.85	Sulfoxaflor	Diathianon	2-methyl-4-chlorophenoxyacetic acid	Methiocarb	Metiram	6-benzyladenine	Dodine	Glyphosate	Flonicamid	Etofenprox	NA	NA	NA	NA	NA	NA	NA	NA	NA	NA	NA	NA	NA	NA	NA	NA	NA	NA
ITA_AP14C	ITA_APP_14_A	Apis mellifera	Italy	Apple	46.36419	23.27	313.593	33.448	21.472	1.323	11.83	13.64	Sulfoxaflor	Diathianon	2-methyl-4-chlorophenoxyacetic acid	Methiocarb	Metiram	6-benzyladenine	Dodine	Glyphosate	Flonicamid	Etofenprox	NA	NA	NA	NA	NA	NA	NA	NA	NA	NA	NA	NA	NA	NA	NA	NA	NA	NA
ITA_AP14D	ITA_APP_14_A	Apis mellifera	Italy	Apple	46.36419	23.27	313.593	33.448	21.472	1.323	11.83	13.73	Sulfoxaflor	Diathianon	2-methyl-4-chlorophenoxyacetic acid	Methiocarb	Metiram	6-benzyladenine	Dodine	Glyphosate	Flonicamid	Etofenprox	NA	NA	NA	NA	NA	NA	NA	NA	NA	NA	NA	NA	NA	NA	NA	NA	NA	NA
ITA_AP14E	ITA_APP_14_A	Apis mellifera	Italy	Apple	46.36419	23.27	313.593	33.448	21.472	1.323	11.83	9.59	Sulfoxaflor	Diathianon	2-methyl-4-chlorophenoxyacetic acid	Methiocarb	Metiram	6-benzyladenine	Dodine	Glyphosate	Flonicamid	Etofenprox	NA	NA	NA	NA	NA	NA	NA	NA	NA	NA	NA	NA	NA	NA	NA	NA	NA	NA
ITA_AP15A	ITA_APP_15_A	Apis mellifera	Italy	Apple	45.89553	44.81	254.516	24.144	42.144	1.552	10.39	9.09	Fluazinam	Cyprodinil	Sulfoxaflor	Diathianon	Captan	Difenoconazole	Sulphur	NA	NA	NA	NA	NA	NA	NA	NA	NA	NA	NA	NA	NA	NA	NA	NA	NA	NA	NA	NA	NA
ITA_AP15B	ITA_APP_15_A	Apis mellifera	Italy	Apple	45.89553	44.81	254.516	24.144	42.144	1.552	10.39	10.15	Fluazinam	Cyprodinil	Sulfoxaflor	Diathianon	Captan	Difenoconazole	Sulphur	NA	NA	NA	NA	NA	NA	NA	NA	NA	NA	NA	NA	NA	NA	NA	NA	NA	NA	NA	NA	NA
ITA_AP15C	ITA_APP_15_A	Apis mellifera	Italy	Apple	45.89553	44.81	254.516	24.144	42.144	1.552	10.39	12.09	Fluazinam	Cyprodinil	Sulfoxaflor	Diathianon	Captan	Difenoconazole	Sulphur	NA	NA	NA	NA	NA	NA	NA	NA	NA	NA	NA	NA	NA	NA	NA	NA	NA	NA	NA	NA	NA
ITA_AP15D	ITA_APP_15_A	Apis mellifera	Italy	Apple	45.89553	44.81	254.516	24.144	42.144	1.552	10.39	9.13	Fluazinam	Cyprodinil	Sulfoxaflor	Diathianon	Captan	Difenoconazole	Sulphur	NA	NA	NA	NA	NA	NA	NA	NA	NA	NA	NA	NA	NA	NA	NA	NA	NA	NA	NA	NA	NA
ITA_AP15E	ITA_APP_15_A	Apis mellifera	Italy	Apple	45.89553	44.81	254.516	24.144	42.144	1.552	10.39	16.05	Fluazinam	Cyprodinil	Sulfoxaflor	Diathianon	Captan	Difenoconazole	Sulphur	NA	NA	NA	NA	NA	NA	NA	NA	NA	NA	NA	NA	NA	NA	NA	NA	NA	NA	NA	NA	NA
ITA_AP16A	ITA_APP_16_A	Apis mellifera	Italy	Apple	45.91851	54.94	228.966	13.509	32.636	1.364	83.65	11.90	Potassium Hydrogen Carbonate	Calcium polysulfide	Cydia pomonella granulosis virus	Azadirachtin	Copper sulphate	Sulphur	NA	NA	NA	NA	NA	NA	NA	NA	NA	NA	NA	NA	NA	NA	NA	NA	NA	NA	NA	NA	NA	NA
ITA_AP16B	ITA_APP_16_A	Apis mellifera	Italy	Apple	45.91851	54.94	228.966	13.509	32.636	1.364	83.65	10.42	Potassium Hydrogen Carbonate	Calcium polysulfide	Cydia pomonella granulosis virus	Azadirachtin	Copper sulphate	Sulphur	NA	NA	NA	NA	NA	NA	NA	NA	NA	NA	NA	NA	NA	NA	NA	NA	NA	NA	NA	NA	NA	NA
ITA_AP16C	ITA_APP_16_A	Apis mellifera	Italy	Apple	45.91851	54.94	228.966	13.509	32.636	1.364	83.65	13.48	Potassium Hydrogen Carbonate	Calcium polysulfide	Cydia pomonella granulosis virus	Azadirachtin	Copper sulphate	Sulphur	NA	NA	NA	NA	NA	NA	NA	NA	NA	NA	NA	NA	NA	NA	NA	NA	NA	NA	NA	NA	NA	NA
ITA_AP16D	ITA_APP_16_A	Apis mellifera	Italy	Apple	45.91851	54.94	228.966	13.509	32.636	1.364	83.65	10.76	Potassium Hydrogen Carbonate	Calcium polysulfide	Cydia pomonella granulosis virus	Azadirachtin	Copper sulphate	Sulphur	NA	NA	NA	NA	NA	NA	NA	NA	NA	NA	NA	NA	NA	NA	NA	NA	NA	NA	NA	NA	NA	NA
ITA_AP16E	ITA_APP_16_A	Apis mellifera	Italy	Apple	45.91851	54.94	228.966	13.509	32.636	1.364	83.65	8.15	Potassium Hydrogen Carbonate	Calcium polysulfide	Cydia pomonella granulosis virus	Azadirachtin	Copper sulphate	Sulphur	NA	NA	NA	NA	NA	NA	NA	NA	NA	NA	NA	NA	NA	NA	NA	NA	NA	NA	NA	NA	NA	NA
ITA_B1A	ITA_OSR_01_B	Bombus terrestris	Italy	Oilseed rape	44.86844	56.59	300.569	55.155	30.067	1.325	2.7	5.76	Acetamiprid	Metazachlor	NA	NA	NA	NA	NA	NA	NA	NA	NA	NA	NA	NA	NA	NA	NA	NA	NA	NA	NA	NA	NA	NA	NA	NA	NA	NA
ITA_B1B	ITA_OSR_01_B	Bombus terrestris	Italy	Oilseed rape	44.86844	56.59	300.569	55.155	30.067	1.325	2.7	5.48	Acetamiprid	Metazachlor	NA	NA	NA	NA	NA	NA	NA	NA	NA	NA	NA	NA	NA	NA	NA	NA	NA	NA	NA	NA	NA	NA	NA	NA	NA	NA
ITA_B1C	ITA_OSR_01_B	Bombus terrestris	Italy	Oilseed rape	44.86844	56.59	300.569	55.155	30.067	1.325	2.7	8.12	Acetamiprid	Metazachlor	NA	NA	NA	NA	NA	NA	NA	NA	NA	NA	NA	NA	NA	NA	NA	NA	NA	NA	NA	NA	NA	NA	NA	NA	NA	NA
ITA_B1D	ITA_OSR_01_B	Bombus terrestris	Italy	Oilseed rape	44.86844	56.59	300.569	55.155	30.067	1.325	2.7	8.68	Acetamiprid	Metazachlor	NA	NA	NA	NA	NA	NA	NA	NA	NA	NA	NA	NA	NA	NA	NA	NA	NA	NA	NA	NA	NA	NA	NA	NA	NA	NA
ITA_B1E	ITA_OSR_01_B	Bombus terrestris	Italy	Oilseed rape	44.86844	56.59	300.569	55.155	30.067	1.325	2.7	9.36	Acetamiprid	Metazachlor	NA	NA	NA	NA	NA	NA	NA	NA	NA	NA	NA	NA	NA	NA	NA	NA	NA	NA	NA	NA	NA	NA	NA	NA	NA	NA
ITA_B3A	ITA_OSR_03_B	Bombus terrestris	Italy	Oilseed rape	45.01754	67.55	234.494	54.276	1.032	1.328	NA	5.84	NA	NA	NA	NA	NA	NA	NA	NA	NA	NA	NA	NA	NA	NA	NA	NA	NA	NA	NA	NA	NA	NA	NA	NA	NA	NA	NA	NA
ITA_B3B	ITA_OSR_03_B	Bombus terrestris	Italy	Oilseed rape	45.01754	67.55	234.494	54.276	1.032	1.328	NA	7.65	NA	NA	NA	NA	NA	NA	NA	NA	NA	NA	NA	NA	NA	NA	NA	NA	NA	NA	NA	NA	NA	NA	NA	NA	NA	NA	NA	NA
ITA_B3C	ITA_OSR_03_B	Bombus terrestris	Italy	Oilseed rape	45.01754	67.55	234.494	54.276	1.032	1.328	NA	8.14	NA	NA	NA	NA	NA	NA	NA	NA	NA	NA	NA	NA	NA	NA	NA	NA	NA	NA	NA	NA	NA	NA	NA	NA	NA	NA	NA	NA
ITA_B3D	ITA_OSR_03_B	Bombus terrestris	Italy	Oilseed rape	45.01754	67.55	234.494	54.276	1.032	1.328	NA	10.19	NA	NA	NA	NA	NA	NA	NA	NA	NA	NA	NA	NA	NA	NA	NA	NA	NA	NA	NA	NA	NA	NA	NA	NA	NA	NA	NA	NA
ITA_B3E	ITA_OSR_03_B	Bombus terrestris	Italy	Oilseed rape	45.01754	67.55	234.494	54.276	1.032	1.328	NA	7.09	NA	NA	NA	NA	NA	NA	NA	NA	NA	NA	NA	NA	NA	NA	NA	NA	NA	NA	NA	NA	NA	NA	NA	NA	NA	NA	NA	NA
ITA_B4A	ITA_OSR_04_B	Bombus terrestris	Italy	Oilseed rape	44.88203	79.63	150.873	18.695	1.986	1.082	NA	5.57	NA	NA	NA	NA	NA	NA	NA	NA	NA	NA	NA	NA	NA	NA	NA	NA	NA	NA	NA	NA	NA	NA	NA	NA	NA	NA	NA	NA
ITA_B4B	ITA_OSR_04_B	Bombus terrestris	Italy	Oilseed rape	44.88203	79.63	150.873	18.695	1.986	1.082	NA	7.33	NA	NA	NA	NA	NA	NA	NA	NA	NA	NA	NA	NA	NA	NA	NA	NA	NA	NA	NA	NA	NA	NA	NA	NA	NA	NA	NA	NA
ITA_B4C	ITA_OSR_04_B	Bombus terrestris	Italy	Oilseed rape	44.88203	79.63	150.873	18.695	1.986	1.082	NA	5.87	NA	NA	NA	NA	NA	NA	NA	NA	NA	NA	NA	NA	NA	NA	NA	NA	NA	NA	NA	NA	NA	NA	NA	NA	NA	NA	NA	NA
ITA_B4D	ITA_OSR_04_B	Bombus terrestris	Italy	Oilseed rape	44.88203	79.63	150.873	18.695	1.986	1.082	NA	9.38	NA	NA	NA	NA	NA	NA	NA	NA	NA	NA	NA	NA	NA	NA	NA	NA	NA	NA	NA	NA	NA	NA	NA	NA	NA	NA	NA	NA
ITA_B4E	ITA_OSR_04_B	Bombus terrestris	Italy	Oilseed rape	44.88203	79.63	150.873	18.695	1.986	1.082	NA	5.76	NA	NA	NA	NA	NA	NA	NA	NA	NA	NA	NA	NA	NA	NA	NA	NA	NA	NA	NA	NA	NA	NA	NA	NA	NA	NA	NA	NA
ITA_B5A	ITA_OSR_05_B	Bombus terrestris	Italy	Oilseed rape	44.96752	69.85	221.761	56.241	2.67	1.286	1.8	7.63	Deltamethrin	Metazachlor	NA	NA	NA	NA	NA	NA	NA	NA	NA	NA	NA	NA	NA	NA	NA	NA	NA	NA	NA	NA	NA	NA	NA	NA	NA	NA
ITA_B5B	ITA_OSR_05_B	Bombus terrestris	Italy	Oilseed rape	44.96752	69.85	221.761	56.241	2.67	1.286	1.8	7.10	Deltamethrin	Metazachlor	NA	NA	NA	NA	NA	NA	NA	NA	NA	NA	NA	NA	NA	NA	NA	NA	NA	NA	NA	NA	NA	NA	NA	NA	NA	NA
ITA_B5C	ITA_OSR_05_B	Bombus terrestris	Italy	Oilseed rape	44.96752	69.85	221.761	56.241	2.67	1.286	1.8	7.91	Deltamethrin	Metazachlor	NA	NA	NA	NA	NA	NA	NA	NA	NA	NA	NA	NA	NA	NA	NA	NA	NA	NA	NA	NA	NA	NA	NA	NA	NA	NA
ITA_B5D	ITA_OSR_05_B	Bombus terrestris	Italy	Oilseed rape	44.96752	69.85	221.761	56.241	2.67	1.286	1.8	7.41	Deltamethrin	Metazachlor	NA	NA	NA	NA	NA	NA	NA	NA	NA	NA	NA	NA	NA	NA	NA	NA	NA	NA	NA	NA	NA	NA	NA	NA	NA	NA
ITA_B5E	ITA_OSR_05_B	Bombus terrestris	Italy	Oilseed rape	44.96752	69.85	221.761	56.241	2.67	1.286	1.8	7.31	Deltamethrin	Metazachlor	NA	NA	NA	NA	NA	NA	NA	NA	NA	NA	NA	NA	NA	NA	NA	NA	NA	NA	NA	NA	NA	NA	NA	NA	NA	NA
ITA_B6A	ITA_OSR_06_B	Bombus terrestris	Italy	Oilseed rape	45.00762	61.59	290.068	53.692	4.8	1.323	NA	7.61	NA	NA	NA	NA	NA	NA	NA	NA	NA	NA	NA	NA	NA	NA	NA	NA	NA	NA	NA	NA	NA	NA	NA	NA	NA	NA	NA	NA
ITA_B6B	ITA_OSR_06_B	Bombus terrestris	Italy	Oilseed rape	45.00762	61.59	290.068	53.692	4.8	1.323	NA	8.88	NA	NA	NA	NA	NA	NA	NA	NA	NA	NA	NA	NA	NA	NA	NA	NA	NA	NA	NA	NA	NA	NA	NA	NA	NA	NA	NA	NA
ITA_B6C	ITA_OSR_06_B	Bombus terrestris	Italy	Oilseed rape	45.00762	61.59	290.068	53.692	4.8	1.323	NA	10.98	NA	NA	NA	NA	NA	NA	NA	NA	NA	NA	NA	NA	NA	NA	NA	NA	NA	NA	NA	NA	NA	NA	NA	NA	NA	NA	NA	NA
ITA_B6D	ITA_OSR_06_B	Bombus terrestris	Italy	Oilseed rape	45.00762	61.59	290.068	53.692	4.8	1.323	NA	7.11	NA	NA	NA	NA	NA	NA	NA	NA	NA	NA	NA	NA	NA	NA	NA	NA	NA	NA	NA	NA	NA	NA	NA	NA	NA	NA	NA	NA
ITA_B6E	ITA_OSR_06_B	Bombus terrestris	Italy	Oilseed rape	45.00762	61.59	290.068	53.692	4.8	1.323	NA	7.69	NA	NA	NA	NA	NA	NA	NA	NA	NA	NA	NA	NA	NA	NA	NA	NA	NA	NA	NA	NA	NA	NA	NA	NA	NA	NA	NA	NA
ITA_B7A	ITA_OSR_07_B	Bombus terrestris	Italy	Oilseed rape	44.90287	53.59	363.464	52.872	6.625	1.382	NA	8.20	NA	NA	NA	NA	NA	NA	NA	NA	NA	NA	NA	NA	NA	NA	NA	NA	NA	NA	NA	NA	NA	NA	NA	NA	NA	NA	NA	NA
ITA_B7B	ITA_OSR_07_B	Bombus terrestris	Italy	Oilseed rape	44.90287	53.59	363.464	52.872	6.625	1.382	NA	11.19	NA	NA	NA	NA	NA	NA	NA	NA	NA	NA	NA	NA	NA	NA	NA	NA	NA	NA	NA	NA	NA	NA	NA	NA	NA	NA	NA	NA
ITA_B7C	ITA_OSR_07_B	Bombus terrestris	Italy	Oilseed rape	44.90287	53.59	363.464	52.872	6.625	1.382	NA	7.04	NA	NA	NA	NA	NA	NA	NA	NA	NA	NA	NA	NA	NA	NA	NA	NA	NA	NA	NA	NA	NA	NA	NA	NA	NA	NA	NA	NA
ITA_B7D	ITA_OSR_07_B	Bombus terrestris	Italy	Oilseed rape	44.90287	53.59	363.464	52.872	6.625	1.382	NA	9.82	NA	NA	NA	NA	NA	NA	NA	NA	NA	NA	NA	NA	NA	NA	NA	NA	NA	NA	NA	NA	NA	NA	NA	NA	NA	NA	NA	NA
ITA_B7E	ITA_OSR_07_B	Bombus terrestris	Italy	Oilseed rape	44.90287	53.59	363.464	52.872	6.625	1.382	NA	9.62	NA	NA	NA	NA	NA	NA	NA	NA	NA	NA	NA	NA	NA	NA	NA	NA	NA	NA	NA	NA	NA	NA	NA	NA	NA	NA	NA	NA
ITA_B8A	ITA_OSR_08_B	Bombus terrestris	Italy	Oilseed rape	44.91454	66.43	317.694	49.62	16.269	1.207	NA	9.82	NA	NA	NA	NA	NA	NA	NA	NA	NA	NA	NA	NA	NA	NA	NA	NA	NA	NA	NA	NA	NA	NA	NA	NA	NA	NA	NA	NA
ITA_B8B	ITA_OSR_08_B	Bombus terrestris	Italy	Oilseed rape	44.91454	66.43	317.694	49.62	16.269	1.207	NA	5.56	NA	NA	NA	NA	NA	NA	NA	NA	NA	NA	NA	NA	NA	NA	NA	NA	NA	NA	NA	NA	NA	NA	NA	NA	NA	NA	NA	NA
ITA_B8C	ITA_OSR_08_B	Bombus terrestris	Italy	Oilseed rape	44.91454	66.43	317.694	49.62	16.269	1.207	NA	7.97	NA	NA	NA	NA	NA	NA	NA	NA	NA	NA	NA	NA	NA	NA	NA	NA	NA	NA	NA	NA	NA	NA	NA	NA	NA	NA	NA	NA
ITA_B8D	ITA_OSR_08_B	Bombus terrestris	Italy	Oilseed rape	44.91454	66.43	317.694	49.62	16.269	1.207	NA	7.17	NA	NA	NA	NA	NA	NA	NA	NA	NA	NA	NA	NA	NA	NA	NA	NA	NA	NA	NA	NA	NA	NA	NA	NA	NA	NA	NA	NA
ITA_B8E	ITA_OSR_08_B	Bombus terrestris	Italy	Oilseed rape	44.91454	66.43	317.694	49.62	16.269	1.207	NA	10.84	NA	NA	NA	NA	NA	NA	NA	NA	NA	NA	NA	NA	NA	NA	NA	NA	NA	NA	NA	NA	NA	NA	NA	NA	NA	NA	NA	NA
ITA_B9A	ITA_APP_09_B	Bombus terrestris	Italy	Apple	46.28927	65.98	66.527	2.991	5.501	0.971	32.16	9.69	Calcium polysulfide	Sulphur	Azadirachtin	Copper sulphate	NA	NA	NA	NA	NA	NA	NA	NA	NA	NA	NA	NA	NA	NA	NA	NA	NA	NA	NA	NA	NA	NA	NA	NA
ITA_B9B	ITA_APP_09_B	Bombus terrestris	Italy	Apple	46.28927	65.98	66.527	2.991	5.501	0.971	32.16	10.17	Calcium polysulfide	Sulphur	Azadirachtin	Copper sulphate	NA	NA	NA	NA	NA	NA	NA	NA	NA	NA	NA	NA	NA	NA	NA	NA	NA	NA	NA	NA	NA	NA	NA	NA
ITA_B9C	ITA_APP_09_B	Bombus terrestris	Italy	Apple	46.28927	65.98	66.527	2.991	5.501	0.971	32.16	9.20	Calcium polysulfide	Sulphur	Azadirachtin	Copper sulphate	NA	NA	NA	NA	NA	NA	NA	NA	NA	NA	NA	NA	NA	NA	NA	NA	NA	NA	NA	NA	NA	NA	NA	NA
ITA_B9D	ITA_APP_09_B	Bombus terrestris	Italy	Apple	46.28927	65.98	66.527	2.991	5.501	0.971	32.16	10.10	Calcium polysulfide	Sulphur	Azadirachtin	Copper sulphate	NA	NA	NA	NA	NA	NA	NA	NA	NA	NA	NA	NA	NA	NA	NA	NA	NA	NA	NA	NA	NA	NA	NA	NA
ITA_B9E	ITA_APP_09_B	Bombus terrestris	Italy	Apple	46.28927	65.98	66.527	2.991	5.501	0.971	32.16	9.64	Calcium polysulfide	Sulphur	Azadirachtin	Copper sulphate	NA	NA	NA	NA	NA	NA	NA	NA	NA	NA	NA	NA	NA	NA	NA	NA	NA	NA	NA	NA	NA	NA	NA	NA
ITA_B10A	ITA_APP_10_B	Bombus terrestris	Italy	Apple	46.02610	10.93	385.158	45.441	13.74	1.486	28.93	9.96	Calcium polysulfide	Azadirachtin	Sulphur	NA	NA	NA	NA	NA	NA	NA	NA	NA	NA	NA	NA	NA	NA	NA	NA	NA	NA	NA	NA	NA	NA	NA	NA	NA
ITA_B10B	ITA_APP_10_B	Bombus terrestris	Italy	Apple	46.02610	10.93	385.158	45.441	13.74	1.486	28.93	6.18	Calcium polysulfide	Azadirachtin	Sulphur	NA	NA	NA	NA	NA	NA	NA	NA	NA	NA	NA	NA	NA	NA	NA	NA	NA	NA	NA	NA	NA	NA	NA	NA	NA
ITA_B10C	ITA_APP_10_B	Bombus terrestris	Italy	Apple	46.02610	10.93	385.158	45.441	13.74	1.486	28.93	8.25	Calcium polysulfide	Azadirachtin	Sulphur	NA	NA	NA	NA	NA	NA	NA	NA	NA	NA	NA	NA	NA	NA	NA	NA	NA	NA	NA	NA	NA	NA	NA	NA	NA
ITA_B10D	ITA_APP_10_B	Bombus terrestris	Italy	Apple	46.02610	10.93	385.158	45.441	13.74	1.486	28.93	9.47	Calcium polysulfide	Azadirachtin	Sulphur	NA	NA	NA	NA	NA	NA	NA	NA	NA	NA	NA	NA	NA	NA	NA	NA	NA	NA	NA	NA	NA	NA	NA	NA	NA
ITA_B10E	ITA_APP_10_B	Bombus terrestris	Italy	Apple	46.02610	10.93	385.158	45.441	13.74	1.486	28.93	5.90	Calcium polysulfide	Azadirachtin	Sulphur	NA	NA	NA	NA	NA	NA	NA	NA	NA	NA	NA	NA	NA	NA	NA	NA	NA	NA	NA	NA	NA	NA	NA	NA	NA
ITA_B11A	ITA_APP_11_B	Bombus terrestris	Italy	Apple	46.01578	43.6	274.38	56.319	14.484	1.492	100.23	11.54	Calcium polysulfide	Azadirachtin	Copper sulphate	Sulphur	NA	NA	NA	NA	NA	NA	NA	NA	NA	NA	NA	NA	NA	NA	NA	NA	NA	NA	NA	NA	NA	NA	NA	NA
ITA_B11B	ITA_APP_11_B	Bombus terrestris	Italy	Apple	46.01578	43.6	274.38	56.319	14.484	1.492	100.23	11.51	Calcium polysulfide	Azadirachtin	Copper sulphate	Sulphur	NA	NA	NA	NA	NA	NA	NA	NA	NA	NA	NA	NA	NA	NA	NA	NA	NA	NA	NA	NA	NA	NA	NA	NA
ITA_B11C	ITA_APP_11_B	Bombus terrestris	Italy	Apple	46.01578	43.6	274.38	56.319	14.484	1.492	100.23	10.33	Calcium polysulfide	Azadirachtin	Copper sulphate	Sulphur	NA	NA	NA	NA	NA	NA	NA	NA	NA	NA	NA	NA	NA	NA	NA	NA	NA	NA	NA	NA	NA	NA	NA	NA
ITA_B11D	ITA_APP_11_B	Bombus terrestris	Italy	Apple	46.01578	43.6	274.38	56.319	14.484	1.492	100.23	11.01	Calcium polysulfide	Azadirachtin	Copper sulphate	Sulphur	NA	NA	NA	NA	NA	NA	NA	NA	NA	NA	NA	NA	NA	NA	NA	NA	NA	NA	NA	NA	NA	NA	NA	NA
ITA_B11E	ITA_APP_11_B	Bombus terrestris	Italy	Apple	46.01578	43.6	274.38	56.319	14.484	1.492	100.23	10.24	Calcium polysulfide	Azadirachtin	Copper sulphate	Sulphur	NA	NA	NA	NA	NA	NA	NA	NA	NA	NA	NA	NA	NA	NA	NA	NA	NA	NA	NA	NA	NA	NA	NA	NA
ITA_B12A	ITA_APP_12_B	Bombus terrestris	Italy	Apple	46.16120	51.29	206.563	9.652	4.139	1.034	150.45	6.55	Calcium polysulfide	Azadirachtin	Paraffin Oil	Sulphur	NA	NA	NA	NA	NA	NA	NA	NA	NA	NA	NA	NA	NA	NA	NA	NA	NA	NA	NA	NA	NA	NA	NA	NA
ITA_B12B	ITA_APP_12_B	Bombus terrestris	Italy	Apple	46.16120	51.29	206.563	9.652	4.139	1.034	150.45	5.73	Calcium polysulfide	Azadirachtin	Paraffin Oil	Sulphur	NA	NA	NA	NA	NA	NA	NA	NA	NA	NA	NA	NA	NA	NA	NA	NA	NA	NA	NA	NA	NA	NA	NA	NA
ITA_B12C	ITA_APP_12_B	Bombus terrestris	Italy	Apple	46.16120	51.29	206.563	9.652	4.139	1.034	150.45	7.93	Calcium polysulfide	Azadirachtin	Paraffin Oil	Sulphur	NA	NA	NA	NA	NA	NA	NA	NA	NA	NA	NA	NA	NA	NA	NA	NA	NA	NA	NA	NA	NA	NA	NA	NA
ITA_B12D	ITA_APP_12_B	Bombus terrestris	Italy	Apple	46.16120	51.29	206.563	9.652	4.139	1.034	150.45	6.23	Calcium polysulfide	Azadirachtin	Paraffin Oil	Sulphur	NA	NA	NA	NA	NA	NA	NA	NA	NA	NA	NA	NA	NA	NA	NA	NA	NA	NA	NA	NA	NA	NA	NA	NA
ITA_B12E	ITA_APP_12_B	Bombus terrestris	Italy	Apple	46.16120	51.29	206.563	9.652	4.139	1.034	150.45	5.22	Calcium polysulfide	Azadirachtin	Paraffin Oil	Sulphur	NA	NA	NA	NA	NA	NA	NA	NA	NA	NA	NA	NA	NA	NA	NA	NA	NA	NA	NA	NA	NA	NA	NA	NA
ITA_B13A	ITA_APP_13_B	Bombus terrestris	Italy	Apple	46.44328	34.01	226.066	31.727	3.93	1.184	20.83	4.93	1-Naphthaleneacetamide	Copper oxychloride	Diathianon	Acetamiprid	Penthiopyrad	Methiocarb	Metiram	6-benzyladenine	Fluxapyroxad	Phosmet	Dodine	Flonicamid	Penconazole	NA	NA	NA	NA	NA	NA	NA	NA	NA	NA	NA	NA	NA	NA	NA
ITA_B13B	ITA_APP_13_B	Bombus terrestris	Italy	Apple	46.44328	34.01	226.066	31.727	3.93	1.184	20.83	6.53	1-Naphthaleneacetamide	Copper oxychloride	Diathianon	Acetamiprid	Penthiopyrad	Methiocarb	Metiram	6-benzyladenine	Fluxapyroxad	Phosmet	Dodine	Flonicamid	Penconazole	NA	NA	NA	NA	NA	NA	NA	NA	NA	NA	NA	NA	NA	NA	NA
ITA_B13C	ITA_APP_13_B	Bombus terrestris	Italy	Apple	46.44328	34.01	226.066	31.727	3.93	1.184	20.83	6.73	1-Naphthaleneacetamide	Copper oxychloride	Diathianon	Acetamiprid	Penthiopyrad	Methiocarb	Metiram	6-benzyladenine	Fluxapyroxad	Phosmet	Dodine	Flonicamid	Penconazole	NA	NA	NA	NA	NA	NA	NA	NA	NA	NA	NA	NA	NA	NA	NA
ITA_B13D	ITA_APP_13_B	Bombus terrestris	Italy	Apple	46.44328	34.01	226.066	31.727	3.93	1.184	20.83	7.85	1-Naphthaleneacetamide	Copper oxychloride	Diathianon	Acetamiprid	Penthiopyrad	Methiocarb	Metiram	6-benzyladenine	Fluxapyroxad	Phosmet	Dodine	Flonicamid	Penconazole	NA	NA	NA	NA	NA	NA	NA	NA	NA	NA	NA	NA	NA	NA	NA
ITA_B13E	ITA_APP_13_B	Bombus terrestris	Italy	Apple	46.44328	34.01	226.066	31.727	3.93	1.184	20.83	8.28	1-Naphthaleneacetamide	Copper oxychloride	Diathianon	Acetamiprid	Penthiopyrad	Methiocarb	Metiram	6-benzyladenine	Fluxapyroxad	Phosmet	Dodine	Flonicamid	Penconazole	NA	NA	NA	NA	NA	NA	NA	NA	NA	NA	NA	NA	NA	NA	NA
ITA_B14A	ITA_APP_14_B	Bombus terrestris	Italy	Apple	46.36419	23.27	313.593	33.448	21.472	1.323	11.83	7.75	Sulfoxaflor	Diathianon	2-methyl-4-chlorophenoxyacetic acid	Methiocarb	Metiram	6-benzyladenine	Dodine	Glyphosate	Flonicamid	Etofenprox	NA	NA	NA	NA	NA	NA	NA	NA	NA	NA	NA	NA	NA	NA	NA	NA	NA	NA
ITA_B14B	ITA_APP_14_B	Bombus terrestris	Italy	Apple	46.36419	23.27	313.593	33.448	21.472	1.323	11.83	9.94	Sulfoxaflor	Diathianon	2-methyl-4-chlorophenoxyacetic acid	Methiocarb	Metiram	6-benzyladenine	Dodine	Glyphosate	Flonicamid	Etofenprox	NA	NA	NA	NA	NA	NA	NA	NA	NA	NA	NA	NA	NA	NA	NA	NA	NA	NA
ITA_B14C	ITA_APP_14_B	Bombus terrestris	Italy	Apple	46.36419	23.27	313.593	33.448	21.472	1.323	11.83	10.21	Sulfoxaflor	Diathianon	2-methyl-4-chlorophenoxyacetic acid	Methiocarb	Metiram	6-benzyladenine	Dodine	Glyphosate	Flonicamid	Etofenprox	NA	NA	NA	NA	NA	NA	NA	NA	NA	NA	NA	NA	NA	NA	NA	NA	NA	NA
ITA_B14D	ITA_APP_14_B	Bombus terrestris	Italy	Apple	46.36419	23.27	313.593	33.448	21.472	1.323	11.83	7.69	Sulfoxaflor	Diathianon	2-methyl-4-chlorophenoxyacetic acid	Methiocarb	Metiram	6-benzyladenine	Dodine	Glyphosate	Flonicamid	Etofenprox	NA	NA	NA	NA	NA	NA	NA	NA	NA	NA	NA	NA	NA	NA	NA	NA	NA	NA
ITA_B14E	ITA_APP_14_B	Bombus terrestris	Italy	Apple	46.36419	23.27	313.593	33.448	21.472	1.323	11.83	9.93	Sulfoxaflor	Diathianon	2-methyl-4-chlorophenoxyacetic acid	Methiocarb	Metiram	6-benzyladenine	Dodine	Glyphosate	Flonicamid	Etofenprox	NA	NA	NA	NA	NA	NA	NA	NA	NA	NA	NA	NA	NA	NA	NA	NA	NA	NA
ITA_B15A	ITA_APP_15_B	Bombus terrestris	Italy	Apple	45.89553	44.81	254.516	24.144	42.144	1.552	10.39	7.02	Fluazinam	Cyprodinil	Sulfoxaflor	Diathianon	Captan	Difenoconazole	Sulphur	NA	NA	NA	NA	NA	NA	NA	NA	NA	NA	NA	NA	NA	NA	NA	NA	NA	NA	NA	NA	NA
ITA_B15B	ITA_APP_15_B	Bombus terrestris	Italy	Apple	45.89553	44.81	254.516	24.144	42.144	1.552	10.39	4.86	Fluazinam	Cyprodinil	Sulfoxaflor	Diathianon	Captan	Difenoconazole	Sulphur	NA	NA	NA	NA	NA	NA	NA	NA	NA	NA	NA	NA	NA	NA	NA	NA	NA	NA	NA	NA	NA
ITA_B15C	ITA_APP_15_B	Bombus terrestris	Italy	Apple	45.89553	44.81	254.516	24.144	42.144	1.552	10.39	5.78	Fluazinam	Cyprodinil	Sulfoxaflor	Diathianon	Captan	Difenoconazole	Sulphur	NA	NA	NA	NA	NA	NA	NA	NA	NA	NA	NA	NA	NA	NA	NA	NA	NA	NA	NA	NA	NA
ITA_B15D	ITA_APP_15_B	Bombus terrestris	Italy	Apple	45.89553	44.81	254.516	24.144	42.144	1.552	10.39	9.05	Fluazinam	Cyprodinil	Sulfoxaflor	Diathianon	Captan	Difenoconazole	Sulphur	NA	NA	NA	NA	NA	NA	NA	NA	NA	NA	NA	NA	NA	NA	NA	NA	NA	NA	NA	NA	NA
ITA_B15E	ITA_APP_15_B	Bombus terrestris	Italy	Apple	45.89553	44.81	254.516	24.144	42.144	1.552	10.39	11.28	Fluazinam	Cyprodinil	Sulfoxaflor	Diathianon	Captan	Difenoconazole	Sulphur	NA	NA	NA	NA	NA	NA	NA	NA	NA	NA	NA	NA	NA	NA	NA	NA	NA	NA	NA	NA	NA
ITA_B16A	ITA_APP_16_B	Bombus terrestris	Italy	Apple	45.91851	54.94	228.966	13.509	32.636	1.364	83.65	9.02	Potassium Hydrogen Carbonate	Calcium polysulfide	Cydia pomonella granulosis virus	Azadirachtin	Copper sulphate	Sulphur	NA	NA	NA	NA	NA	NA	NA	NA	NA	NA	NA	NA	NA	NA	NA	NA	NA	NA	NA	NA	NA	NA
ITA_B16B	ITA_APP_16_B	Bombus terrestris	Italy	Apple	45.91851	54.94	228.966	13.509	32.636	1.364	83.65	6.67	Potassium Hydrogen Carbonate	Calcium polysulfide	Cydia pomonella granulosis virus	Azadirachtin	Copper sulphate	Sulphur	NA	NA	NA	NA	NA	NA	NA	NA	NA	NA	NA	NA	NA	NA	NA	NA	NA	NA	NA	NA	NA	NA
ITA_B16C	ITA_APP_16_B	Bombus terrestris	Italy	Apple	45.91851	54.94	228.966	13.509	32.636	1.364	83.65	8.05	Potassium Hydrogen Carbonate	Calcium polysulfide	Cydia pomonella granulosis virus	Azadirachtin	Copper sulphate	Sulphur	NA	NA	NA	NA	NA	NA	NA	NA	NA	NA	NA	NA	NA	NA	NA	NA	NA	NA	NA	NA	NA	NA
ITA_B16D	ITA_APP_16_B	Bombus terrestris	Italy	Apple	45.91851	54.94	228.966	13.509	32.636	1.364	83.65	5.21	Potassium Hydrogen Carbonate	Calcium polysulfide	Cydia pomonella granulosis virus	Azadirachtin	Copper sulphate	Sulphur	NA	NA	NA	NA	NA	NA	NA	NA	NA	NA	NA	NA	NA	NA	NA	NA	NA	NA	NA	NA	NA	NA
ITA_B16E	ITA_APP_16_B	Bombus terrestris	Italy	Apple	45.91851	54.94	228.966	13.509	32.636	1.364	83.65	4.40	Potassium Hydrogen Carbonate	Calcium polysulfide	Cydia pomonella granulosis virus	Azadirachtin	Copper sulphate	Sulphur	NA	NA	NA	NA	NA	NA	NA	NA	NA	NA	NA	NA	NA	NA	NA	NA	NA	NA	NA	NA	NA	NA
ESP_AP1A	ESP_OSR_01_A	Apis mellifera	Spain	Oilseed rape	39.09556	65.14	76.194	7.23	0.469	1.078	18.3	8.96	Lambda-cyhalothrin	Metazachlor	Napropamide	NA	NA	NA	NA	NA	NA	NA	NA	NA	NA	NA	NA	NA	NA	NA	NA	NA	NA	NA	NA	NA	NA	NA	NA	NA
ESP_AP1B	ESP_OSR_01_A	Apis mellifera	Spain	Oilseed rape	39.09556	65.14	76.194	7.23	0.469	1.078	18.3	10.53	Lambda-cyhalothrin	Metazachlor	Napropamide	NA	NA	NA	NA	NA	NA	NA	NA	NA	NA	NA	NA	NA	NA	NA	NA	NA	NA	NA	NA	NA	NA	NA	NA	NA
ESP_AP1C	ESP_OSR_01_A	Apis mellifera	Spain	Oilseed rape	39.09556	65.14	76.194	7.23	0.469	1.078	18.3	14.29	Lambda-cyhalothrin	Metazachlor	Napropamide	NA	NA	NA	NA	NA	NA	NA	NA	NA	NA	NA	NA	NA	NA	NA	NA	NA	NA	NA	NA	NA	NA	NA	NA	NA
ESP_AP1D	ESP_OSR_01_A	Apis mellifera	Spain	Oilseed rape	39.09556	65.14	76.194	7.23	0.469	1.078	18.3	12.01	Lambda-cyhalothrin	Metazachlor	Napropamide	NA	NA	NA	NA	NA	NA	NA	NA	NA	NA	NA	NA	NA	NA	NA	NA	NA	NA	NA	NA	NA	NA	NA	NA	NA
ESP_AP1E	ESP_OSR_01_A	Apis mellifera	Spain	Oilseed rape	39.09556	65.14	76.194	7.23	0.469	1.078	18.3	14.36	Lambda-cyhalothrin	Metazachlor	Napropamide	NA	NA	NA	NA	NA	NA	NA	NA	NA	NA	NA	NA	NA	NA	NA	NA	NA	NA	NA	NA	NA	NA	NA	NA	NA
ESP_AP2A	ESP_OSR_02_A	Apis mellifera	Spain	Oilseed rape	39.02471	94.32	18.802	7.94	2.674	0.493	18.3	6.76	Lambda-cyhalothrin	Metazachlor	Napropamide	NA	NA	NA	NA	NA	NA	NA	NA	NA	NA	NA	NA	NA	NA	NA	NA	NA	NA	NA	NA	NA	NA	NA	NA	NA
ESP_AP2B	ESP_OSR_02_A	Apis mellifera	Spain	Oilseed rape	39.02471	94.32	18.802	7.94	2.674	0.493	18.3	4.83	Lambda-cyhalothrin	Metazachlor	Napropamide	NA	NA	NA	NA	NA	NA	NA	NA	NA	NA	NA	NA	NA	NA	NA	NA	NA	NA	NA	NA	NA	NA	NA	NA	NA
ESP_AP2C	ESP_OSR_02_A	Apis mellifera	Spain	Oilseed rape	39.02471	94.32	18.802	7.94	2.674	0.493	18.3	3.41	Lambda-cyhalothrin	Metazachlor	Napropamide	NA	NA	NA	NA	NA	NA	NA	NA	NA	NA	NA	NA	NA	NA	NA	NA	NA	NA	NA	NA	NA	NA	NA	NA	NA
ESP_AP2D	ESP_OSR_02_A	Apis mellifera	Spain	Oilseed rape	39.02471	94.32	18.802	7.94	2.674	0.493	18.3	5.11	Lambda-cyhalothrin	Metazachlor	Napropamide	NA	NA	NA	NA	NA	NA	NA	NA	NA	NA	NA	NA	NA	NA	NA	NA	NA	NA	NA	NA	NA	NA	NA	NA	NA
ESP_AP2E	ESP_OSR_02_A	Apis mellifera	Spain	Oilseed rape	39.02471	94.32	18.802	7.94	2.674	0.493	18.3	8.43	Lambda-cyhalothrin	Metazachlor	Napropamide	NA	NA	NA	NA	NA	NA	NA	NA	NA	NA	NA	NA	NA	NA	NA	NA	NA	NA	NA	NA	NA	NA	NA	NA	NA
ESP_A3A	ESP_OSR_03_A	Apis mellifera	Spain	Oilseed rape	39.04158	92.79	48.473	6.982	1.954	0.352	18.3	7.73	Lambda-cyhalothrin	Metazachlor	Napropamide	NA	NA	NA	NA	NA	NA	NA	NA	NA	NA	NA	NA	NA	NA	NA	NA	NA	NA	NA	NA	NA	NA	NA	NA	NA
ESP_AP3B	ESP_OSR_03_A	Apis mellifera	Spain	Oilseed rape	39.04158	92.79	48.473	6.982	1.954	0.352	18.3	17.57	Lambda-cyhalothrin	Metazachlor	Napropamide	NA	NA	NA	NA	NA	NA	NA	NA	NA	NA	NA	NA	NA	NA	NA	NA	NA	NA	NA	NA	NA	NA	NA	NA	NA
ESP_AP3C	ESP_OSR_03_A	Apis mellifera	Spain	Oilseed rape	39.04158	92.79	48.473	6.982	1.954	0.352	18.3	17.22	Lambda-cyhalothrin	Metazachlor	Napropamide	NA	NA	NA	NA	NA	NA	NA	NA	NA	NA	NA	NA	NA	NA	NA	NA	NA	NA	NA	NA	NA	NA	NA	NA	NA
ESP_AP3D	ESP_OSR_03_A	Apis mellifera	Spain	Oilseed rape	39.04158	92.79	48.473	6.982	1.954	0.352	18.3	17.32	Lambda-cyhalothrin	Metazachlor	Napropamide	NA	NA	NA	NA	NA	NA	NA	NA	NA	NA	NA	NA	NA	NA	NA	NA	NA	NA	NA	NA	NA	NA	NA	NA	NA
ESP_AP3E	ESP_OSR_03_A	Apis mellifera	Spain	Oilseed rape	39.04158	92.79	48.473	6.982	1.954	0.352	18.3	17.13	Lambda-cyhalothrin	Metazachlor	Napropamide	NA	NA	NA	NA	NA	NA	NA	NA	NA	NA	NA	NA	NA	NA	NA	NA	NA	NA	NA	NA	NA	NA	NA	NA	NA
ESP_AP4A	ESP_OSR_04_A	Apis mellifera	Spain	Oilseed rape	39.06788	97.5	5.201	0.348	1.176	0.155	8.3	13.11	Metazachlor	Napropamide	NA	NA	NA	NA	NA	NA	NA	NA	NA	NA	NA	NA	NA	NA	NA	NA	NA	NA	NA	NA	NA	NA	NA	NA	NA	NA
ESP_AP4B	ESP_OSR_04_A	Apis mellifera	Spain	Oilseed rape	39.06788	97.5	5.201	0.348	1.176	0.155	8.3	12.34	Metazachlor	Napropamide	NA	NA	NA	NA	NA	NA	NA	NA	NA	NA	NA	NA	NA	NA	NA	NA	NA	NA	NA	NA	NA	NA	NA	NA	NA	NA
ESP_AP4C	ESP_OSR_04_A	Apis mellifera	Spain	Oilseed rape	39.06788	97.5	5.201	0.348	1.176	0.155	8.3	8.61	Metazachlor	Napropamide	NA	NA	NA	NA	NA	NA	NA	NA	NA	NA	NA	NA	NA	NA	NA	NA	NA	NA	NA	NA	NA	NA	NA	NA	NA	NA
ESP_AP4D	ESP_OSR_04_A	Apis mellifera	Spain	Oilseed rape	39.06788	97.5	5.201	0.348	1.176	0.155	8.3	5.45	Metazachlor	Napropamide	NA	NA	NA	NA	NA	NA	NA	NA	NA	NA	NA	NA	NA	NA	NA	NA	NA	NA	NA	NA	NA	NA	NA	NA	NA	NA
ESP_AP4E	ESP_OSR_04_A	Apis mellifera	Spain	Oilseed rape	39.06788	97.5	5.201	0.348	1.176	0.155	8.3	8.40	Metazachlor	Napropamide	NA	NA	NA	NA	NA	NA	NA	NA	NA	NA	NA	NA	NA	NA	NA	NA	NA	NA	NA	NA	NA	NA	NA	NA	NA	NA
ESP_AP5A	ESP_OSR_05_A	Apis mellifera	Spain	Oilseed rape	39.16504	93.85	49.225	7.668	0.311	0.302	18.8	8.66	Pirimicarb	Lambda-cyhalothrin	Metazachlor	Napropamide	NA	NA	NA	NA	NA	NA	NA	NA	NA	NA	NA	NA	NA	NA	NA	NA	NA	NA	NA	NA	NA	NA	NA	NA
ESP_AP5B	ESP_OSR_05_A	Apis mellifera	Spain	Oilseed rape	39.16504	93.85	49.225	7.668	0.311	0.302	18.8	3.36	Pirimicarb	Lambda-cyhalothrin	Metazachlor	Napropamide	NA	NA	NA	NA	NA	NA	NA	NA	NA	NA	NA	NA	NA	NA	NA	NA	NA	NA	NA	NA	NA	NA	NA	NA
ESP_AP5C	ESP_OSR_05_A	Apis mellifera	Spain	Oilseed rape	39.16504	93.85	49.225	7.668	0.311	0.302	18.8	6.88	Pirimicarb	Lambda-cyhalothrin	Metazachlor	Napropamide	NA	NA	NA	NA	NA	NA	NA	NA	NA	NA	NA	NA	NA	NA	NA	NA	NA	NA	NA	NA	NA	NA	NA	NA
ESP_AP5D	ESP_OSR_05_A	Apis mellifera	Spain	Oilseed rape	39.16504	93.85	49.225	7.668	0.311	0.302	18.8	6.90	Pirimicarb	Lambda-cyhalothrin	Metazachlor	Napropamide	NA	NA	NA	NA	NA	NA	NA	NA	NA	NA	NA	NA	NA	NA	NA	NA	NA	NA	NA	NA	NA	NA	NA	NA
ESP_AP5E	ESP_OSR_05_A	Apis mellifera	Spain	Oilseed rape	39.16504	93.85	49.225	7.668	0.311	0.302	18.8	6.25	Pirimicarb	Lambda-cyhalothrin	Metazachlor	Napropamide	NA	NA	NA	NA	NA	NA	NA	NA	NA	NA	NA	NA	NA	NA	NA	NA	NA	NA	NA	NA	NA	NA	NA	NA
ESP_AP6A	ESP_OSR_06_A	Apis mellifera	Spain	Oilseed rape	39.16504	93.85	49.225	7.668	0.311	0.302	18.3	11.15	Lambda-cyhalothrin	Metazachlor	Napropamide	NA	NA	NA	NA	NA	NA	NA	NA	NA	NA	NA	NA	NA	NA	NA	NA	NA	NA	NA	NA	NA	NA	NA	NA	NA
ESP_AP6B	ESP_OSR_06_A	Apis mellifera	Spain	Oilseed rape	39.16504	93.85	49.225	7.668	0.311	0.302	18.3	9.00	Lambda-cyhalothrin	Metazachlor	Napropamide	NA	NA	NA	NA	NA	NA	NA	NA	NA	NA	NA	NA	NA	NA	NA	NA	NA	NA	NA	NA	NA	NA	NA	NA	NA
ESP_AP6C	ESP_OSR_06_A	Apis mellifera	Spain	Oilseed rape	39.16504	93.85	49.225	7.668	0.311	0.302	18.3	9.26	Lambda-cyhalothrin	Metazachlor	Napropamide	NA	NA	NA	NA	NA	NA	NA	NA	NA	NA	NA	NA	NA	NA	NA	NA	NA	NA	NA	NA	NA	NA	NA	NA	NA
ESP_AP6D	ESP_OSR_06_A	Apis mellifera	Spain	Oilseed rape	39.16504	93.85	49.225	7.668	0.311	0.302	18.3	14.29	Lambda-cyhalothrin	Metazachlor	Napropamide	NA	NA	NA	NA	NA	NA	NA	NA	NA	NA	NA	NA	NA	NA	NA	NA	NA	NA	NA	NA	NA	NA	NA	NA	NA
ESP_AP6E	ESP_OSR_06_A	Apis mellifera	Spain	Oilseed rape	39.16504	93.85	49.225	7.668	0.311	0.302	18.3	9.49	Lambda-cyhalothrin	Metazachlor	Napropamide	NA	NA	NA	NA	NA	NA	NA	NA	NA	NA	NA	NA	NA	NA	NA	NA	NA	NA	NA	NA	NA	NA	NA	NA	NA
ESP_AP7A	ESP_OSR_07_A	Apis mellifera	Spain	Oilseed rape	38.95955	93.43	35.667	6.062	0.968	0.683	18.3	6.34	Lambda-cyhalothrin	Metazachlor	Napropamide	NA	NA	NA	NA	NA	NA	NA	NA	NA	NA	NA	NA	NA	NA	NA	NA	NA	NA	NA	NA	NA	NA	NA	NA	NA
ESP_AP7B	ESP_OSR_07_A	Apis mellifera	Spain	Oilseed rape	38.95955	93.43	35.667	6.062	0.968	0.683	18.3	7.53	Lambda-cyhalothrin	Metazachlor	Napropamide	NA	NA	NA	NA	NA	NA	NA	NA	NA	NA	NA	NA	NA	NA	NA	NA	NA	NA	NA	NA	NA	NA	NA	NA	NA
ESP_AP7C	ESP_OSR_07_A	Apis mellifera	Spain	Oilseed rape	38.95955	93.43	35.667	6.062	0.968	0.683	18.3	5.71	Lambda-cyhalothrin	Metazachlor	Napropamide	NA	NA	NA	NA	NA	NA	NA	NA	NA	NA	NA	NA	NA	NA	NA	NA	NA	NA	NA	NA	NA	NA	NA	NA	NA
ESP_AP7D	ESP_OSR_07_A	Apis mellifera	Spain	Oilseed rape	38.95955	93.43	35.667	6.062	0.968	0.683	18.3	10.90	Lambda-cyhalothrin	Metazachlor	Napropamide	NA	NA	NA	NA	NA	NA	NA	NA	NA	NA	NA	NA	NA	NA	NA	NA	NA	NA	NA	NA	NA	NA	NA	NA	NA
ESP_AP7E	ESP_OSR_07_A	Apis mellifera	Spain	Oilseed rape	38.95955	93.43	35.667	6.062	0.968	0.683	18.3	12.87	Lambda-cyhalothrin	Metazachlor	Napropamide	NA	NA	NA	NA	NA	NA	NA	NA	NA	NA	NA	NA	NA	NA	NA	NA	NA	NA	NA	NA	NA	NA	NA	NA	NA
ESP_AP8A	ESP_OSR_08_A	Apis mellifera	Spain	Oilseed rape	39.20516	97.41	10.664	0.63	0.129	0.345	18.3	11.05	Lambda-cyhalothrin	Metazachlor	Napropamide	NA	NA	NA	NA	NA	NA	NA	NA	NA	NA	NA	NA	NA	NA	NA	NA	NA	NA	NA	NA	NA	NA	NA	NA	NA
ESP_AP8B	ESP_OSR_08_A	Apis mellifera	Spain	Oilseed rape	39.20516	97.41	10.664	0.63	0.129	0.345	18.3	9.78	Lambda-cyhalothrin	Metazachlor	Napropamide	NA	NA	NA	NA	NA	NA	NA	NA	NA	NA	NA	NA	NA	NA	NA	NA	NA	NA	NA	NA	NA	NA	NA	NA	NA
ESP_AP8C	ESP_OSR_08_A	Apis mellifera	Spain	Oilseed rape	39.20516	97.41	10.664	0.63	0.129	0.345	18.3	7.36	Lambda-cyhalothrin	Metazachlor	Napropamide	NA	NA	NA	NA	NA	NA	NA	NA	NA	NA	NA	NA	NA	NA	NA	NA	NA	NA	NA	NA	NA	NA	NA	NA	NA
ESP_AP8D	ESP_OSR_08_A	Apis mellifera	Spain	Oilseed rape	39.20516	97.41	10.664	0.63	0.129	0.345	18.3	7.72	Lambda-cyhalothrin	Metazachlor	Napropamide	NA	NA	NA	NA	NA	NA	NA	NA	NA	NA	NA	NA	NA	NA	NA	NA	NA	NA	NA	NA	NA	NA	NA	NA	NA
ESP_AP8E	ESP_OSR_08_A	Apis mellifera	Spain	Oilseed rape	39.20516	97.41	10.664	0.63	0.129	0.345	18.3	6.90	Lambda-cyhalothrin	Metazachlor	Napropamide	NA	NA	NA	NA	NA	NA	NA	NA	NA	NA	NA	NA	NA	NA	NA	NA	NA	NA	NA	NA	NA	NA	NA	NA	NA
ESP_AP9A	ESP_APP_09_A	Apis mellifera	Spain	Apple	38.00804	50.15	242.661	41.984	62.331	1.596	13.38	7.12	Copper hydroxide	Paraffin oil	Spinosad	Sulphur	NA	NA	NA	NA	NA	NA	NA	NA	NA	NA	NA	NA	NA	NA	NA	NA	NA	NA	NA	NA	NA	NA	NA	NA
ESP_AP9B	ESP_APP_09_A	Apis mellifera	Spain	Apple	38.00804	50.15	242.661	41.984	62.331	1.596	13.38	11.45	Copper hydroxide	Paraffin oil	Spinosad	Sulphur	NA	NA	NA	NA	NA	NA	NA	NA	NA	NA	NA	NA	NA	NA	NA	NA	NA	NA	NA	NA	NA	NA	NA	NA
ESP_AP9C	ESP_APP_09_A	Apis mellifera	Spain	Apple	38.00804	50.15	242.661	41.984	62.331	1.596	13.38	8.00	Copper hydroxide	Paraffin oil	Spinosad	Sulphur	NA	NA	NA	NA	NA	NA	NA	NA	NA	NA	NA	NA	NA	NA	NA	NA	NA	NA	NA	NA	NA	NA	NA	NA
ESP_AP9D	ESP_APP_09_A	Apis mellifera	Spain	Apple	38.00804	50.15	242.661	41.984	62.331	1.596	13.38	15.34	Copper hydroxide	Paraffin oil	Spinosad	Sulphur	NA	NA	NA	NA	NA	NA	NA	NA	NA	NA	NA	NA	NA	NA	NA	NA	NA	NA	NA	NA	NA	NA	NA	NA
ESP_AP9E	ESP_APP_09_A	Apis mellifera	Spain	Apple	38.00804	50.15	242.661	41.984	62.331	1.596	13.38	11.02	Copper hydroxide	Paraffin oil	Spinosad	Sulphur	NA	NA	NA	NA	NA	NA	NA	NA	NA	NA	NA	NA	NA	NA	NA	NA	NA	NA	NA	NA	NA	NA	NA	NA
ESP_AP10A	ESP_APP_10_A	Apis mellifera	Spain	Apple	38.09006	29.27	330.985	82.128	76.198	1.717	8.5	6.94	Copper	Lambda-cyhalothrin	Paraffin oil	NA	NA	NA	NA	NA	NA	NA	NA	NA	NA	NA	NA	NA	NA	NA	NA	NA	NA	NA	NA	NA	NA	NA	NA	NA
ESP_AP10B	ESP_APP_10_A	Apis mellifera	Spain	Apple	38.09006	29.27	330.985	82.128	76.198	1.717	8.5	6.02	Copper	Lambda-cyhalothrin	Paraffin oil	NA	NA	NA	NA	NA	NA	NA	NA	NA	NA	NA	NA	NA	NA	NA	NA	NA	NA	NA	NA	NA	NA	NA	NA	NA
ESP_AP10C	ESP_APP_10_A	Apis mellifera	Spain	Apple	38.09006	29.27	330.985	82.128	76.198	1.717	8.5	15.12	Copper	Lambda-cyhalothrin	Paraffin oil	NA	NA	NA	NA	NA	NA	NA	NA	NA	NA	NA	NA	NA	NA	NA	NA	NA	NA	NA	NA	NA	NA	NA	NA	NA
ESP_AP10D	ESP_APP_10_A	Apis mellifera	Spain	Apple	38.09006	29.27	330.985	82.128	76.198	1.717	8.5	15.63	Copper	Lambda-cyhalothrin	Paraffin oil	NA	NA	NA	NA	NA	NA	NA	NA	NA	NA	NA	NA	NA	NA	NA	NA	NA	NA	NA	NA	NA	NA	NA	NA	NA
ESP_AP10E	ESP_APP_10_A	Apis mellifera	Spain	Apple	38.09006	29.27	330.985	82.128	76.198	1.717	8.5	7.07	Copper	Lambda-cyhalothrin	Paraffin oil	NA	NA	NA	NA	NA	NA	NA	NA	NA	NA	NA	NA	NA	NA	NA	NA	NA	NA	NA	NA	NA	NA	NA	NA	NA
ESP_AP11A	ESP_APP_11_A	Apis mellifera	Spain	Apple	37.98518	31.96	118.449	13.015	1.059	1.105	19.6	5.06	Phosmet	Pyriproxyfen	Cyprodinil	Cyflufenamid	Copper hydroxide	Penconazole	Lambda-cyhalothrin	Tau-fluvalinate	Paraffin oil	Difenoconazole	Flonicamid	Chloranthraniliprole	Mancozeb	Abamectin	NA	NA	NA	NA	NA	NA	NA	NA	NA	NA	NA	NA	NA	NA
ESP_AP11B	ESP_APP_11_A	Apis mellifera	Spain	Apple	37.98518	31.96	118.449	13.015	1.059	1.105	19.6	7.71	Phosmet	Pyriproxyfen	Cyprodinil	Cyflufenamid	Copper hydroxide	Penconazole	Lambda-cyhalothrin	Tau-fluvalinate	Paraffin oil	Difenoconazole	Flonicamid	Chloranthraniliprole	Mancozeb	Abamectin	NA	NA	NA	NA	NA	NA	NA	NA	NA	NA	NA	NA	NA	NA
ESP_AP11C	ESP_APP_11_A	Apis mellifera	Spain	Apple	37.98518	31.96	118.449	13.015	1.059	1.105	19.6	11.70	Phosmet	Pyriproxyfen	Cyprodinil	Cyflufenamid	Copper hydroxide	Penconazole	Lambda-cyhalothrin	Tau-fluvalinate	Paraffin oil	Difenoconazole	Flonicamid	Chloranthraniliprole	Mancozeb	Abamectin	NA	NA	NA	NA	NA	NA	NA	NA	NA	NA	NA	NA	NA	NA
ESP_AP11D	ESP_APP_11_A	Apis mellifera	Spain	Apple	37.98518	31.96	118.449	13.015	1.059	1.105	19.6	10.94	Phosmet	Pyriproxyfen	Cyprodinil	Cyflufenamid	Copper hydroxide	Penconazole	Lambda-cyhalothrin	Tau-fluvalinate	Paraffin oil	Difenoconazole	Flonicamid	Chloranthraniliprole	Mancozeb	Abamectin	NA	NA	NA	NA	NA	NA	NA	NA	NA	NA	NA	NA	NA	NA
ESP_AP11E	ESP_APP_11_A	Apis mellifera	Spain	Apple	37.98518	31.96	118.449	13.015	1.059	1.105	19.6	13.23	Phosmet	Pyriproxyfen	Cyprodinil	Cyflufenamid	Copper hydroxide	Penconazole	Lambda-cyhalothrin	Tau-fluvalinate	Paraffin oil	Difenoconazole	Flonicamid	Chloranthraniliprole	Mancozeb	Abamectin	NA	NA	NA	NA	NA	NA	NA	NA	NA	NA	NA	NA	NA	NA
ESP_AP12A	ESP_APP_12_A	Apis mellifera	Spain	Apple	38.10025	85.38	67.855	11.637	0.943	0.599	17.2	10.22	Deltamethrin	Abamectin	Beta-cyfluthrin	Copper oxychloride	Pyriproxyfen	Acetamiprid	Spirotetramat	Myclobutanil	NA	NA	NA	NA	NA	NA	NA	NA	NA	NA	NA	NA	NA	NA	NA	NA	NA	NA	NA	NA
ESP_AP12B	ESP_APP_12_A	Apis mellifera	Spain	Apple	38.10025	85.38	67.855	11.637	0.943	0.599	17.2	15.06	Deltamethrin	Abamectin	Beta-cyfluthrin	Copper oxychloride	Pyriproxyfen	Acetamiprid	Spirotetramat	Myclobutanil	NA	NA	NA	NA	NA	NA	NA	NA	NA	NA	NA	NA	NA	NA	NA	NA	NA	NA	NA	NA
ESP_AP12C	ESP_APP_12_A	Apis mellifera	Spain	Apple	38.10025	85.38	67.855	11.637	0.943	0.599	17.2	11.89	Deltamethrin	Abamectin	Beta-cyfluthrin	Copper oxychloride	Pyriproxyfen	Acetamiprid	Spirotetramat	Myclobutanil	NA	NA	NA	NA	NA	NA	NA	NA	NA	NA	NA	NA	NA	NA	NA	NA	NA	NA	NA	NA
ESP_AP12D	ESP_APP_12_A	Apis mellifera	Spain	Apple	38.10025	85.38	67.855	11.637	0.943	0.599	17.2	6.25	Deltamethrin	Abamectin	Beta-cyfluthrin	Copper oxychloride	Pyriproxyfen	Acetamiprid	Spirotetramat	Myclobutanil	NA	NA	NA	NA	NA	NA	NA	NA	NA	NA	NA	NA	NA	NA	NA	NA	NA	NA	NA	NA
ESP_AP12E	ESP_APP_12_A	Apis mellifera	Spain	Apple	38.10025	85.38	67.855	11.637	0.943	0.599	17.2	4.97	Deltamethrin	Abamectin	Beta-cyfluthrin	Copper oxychloride	Pyriproxyfen	Acetamiprid	Spirotetramat	Myclobutanil	NA	NA	NA	NA	NA	NA	NA	NA	NA	NA	NA	NA	NA	NA	NA	NA	NA	NA	NA	NA
ESP_AP13A	ESP_APP_13_A	Apis mellifera	Spain	Apple	38.00838	73.31	157.649	29.418	4.623	1.464	13.95	8.20	Phosmet	Deltamethrin	Lambda-cyhalothrin	Copper	Paraffin Oil	Piriproxifen	Flonicamid	NA	NA	NA	NA	NA	NA	NA	NA	NA	NA	NA	NA	NA	NA	NA	NA	NA	NA	NA	NA	NA
ESP_AP13B	ESP_APP_13_A	Apis mellifera	Spain	Apple	38.00838	73.31	157.649	29.418	4.623	1.464	13.95	5.03	Phosmet	Deltamethrin	Lambda-cyhalothrin	Copper	Paraffin Oil	Piriproxifen	Flonicamid	NA	NA	NA	NA	NA	NA	NA	NA	NA	NA	NA	NA	NA	NA	NA	NA	NA	NA	NA	NA	NA
ESP_AP13C	ESP_APP_13_A	Apis mellifera	Spain	Apple	38.00838	73.31	157.649	29.418	4.623	1.464	13.95	13.11	Phosmet	Deltamethrin	Lambda-cyhalothrin	Copper	Paraffin Oil	Piriproxifen	Flonicamid	NA	NA	NA	NA	NA	NA	NA	NA	NA	NA	NA	NA	NA	NA	NA	NA	NA	NA	NA	NA	NA
ESP_AP13D	ESP_APP_13_A	Apis mellifera	Spain	Apple	38.00838	73.31	157.649	29.418	4.623	1.464	13.95	9.30	Phosmet	Deltamethrin	Lambda-cyhalothrin	Copper	Paraffin Oil	Piriproxifen	Flonicamid	NA	NA	NA	NA	NA	NA	NA	NA	NA	NA	NA	NA	NA	NA	NA	NA	NA	NA	NA	NA	NA
ESP_AP13E	ESP_APP_13_A	Apis mellifera	Spain	Apple	38.00838	73.31	157.649	29.418	4.623	1.464	13.95	13.38	Phosmet	Deltamethrin	Lambda-cyhalothrin	Copper	Paraffin Oil	Piriproxifen	Flonicamid	NA	NA	NA	NA	NA	NA	NA	NA	NA	NA	NA	NA	NA	NA	NA	NA	NA	NA	NA	NA	NA
ESP_AP14A	ESP_APP_14_A	Apis mellifera	Spain	Apple	38.25881	79.2	92.039	23.776	1.44	0.772	33.1	2.52	Copper hydroxide	Paraffin oil	Deltamethrin	Difenoconazole	Dodine	Tau-fluvalinate	Piriproxifen	NA	NA	NA	NA	NA	NA	NA	NA	NA	NA	NA	NA	NA	NA	NA	NA	NA	NA	NA	NA	NA
ESP_AP14B	ESP_APP_14_A	Apis mellifera	Spain	Apple	38.25881	79.2	92.039	23.776	1.44	0.772	33.1	4.80	Copper hydroxide	Paraffin oil	Deltamethrin	Difenoconazole	Dodine	Tau-fluvalinate	Piriproxifen	NA	NA	NA	NA	NA	NA	NA	NA	NA	NA	NA	NA	NA	NA	NA	NA	NA	NA	NA	NA	NA
ESP_AP14C	ESP_APP_14_A	Apis mellifera	Spain	Apple	38.25881	79.2	92.039	23.776	1.44	0.772	33.1	2.40	Copper hydroxide	Paraffin oil	Deltamethrin	Difenoconazole	Dodine	Tau-fluvalinate	Piriproxifen	NA	NA	NA	NA	NA	NA	NA	NA	NA	NA	NA	NA	NA	NA	NA	NA	NA	NA	NA	NA	NA
ESP_AP14D	ESP_APP_14_A	Apis mellifera	Spain	Apple	38.25881	79.2	92.039	23.776	1.44	0.772	33.1	2.16	Copper hydroxide	Paraffin oil	Deltamethrin	Difenoconazole	Dodine	Tau-fluvalinate	Piriproxifen	NA	NA	NA	NA	NA	NA	NA	NA	NA	NA	NA	NA	NA	NA	NA	NA	NA	NA	NA	NA	NA
ESP_AP14E	ESP_APP_14_A	Apis mellifera	Spain	Apple	38.25881	79.2	92.039	23.776	1.44	0.772	33.1	3.88	Copper hydroxide	Paraffin oil	Deltamethrin	Difenoconazole	Dodine	Tau-fluvalinate	Piriproxifen	NA	NA	NA	NA	NA	NA	NA	NA	NA	NA	NA	NA	NA	NA	NA	NA	NA	NA	NA	NA	NA
ESP_AP15A	ESP_APP_15_A	Apis mellifera	Spain	Apple	38.04072	70.86	154.969	40.843	13.533	1.521	6	7.10	Copper	Paraffin oil	Piriproxifen	NA	NA	NA	NA	NA	NA	NA	NA	NA	NA	NA	NA	NA	NA	NA	NA	NA	NA	NA	NA	NA	NA	NA	NA	NA
ESP_AP15B	ESP_APP_15_A	Apis mellifera	Spain	Apple	38.04072	70.86	154.969	40.843	13.533	1.521	6	12.74	Copper	Paraffin oil	Piriproxifen	NA	NA	NA	NA	NA	NA	NA	NA	NA	NA	NA	NA	NA	NA	NA	NA	NA	NA	NA	NA	NA	NA	NA	NA	NA
ESP_AP15C	ESP_APP_15_A	Apis mellifera	Spain	Apple	38.04072	70.86	154.969	40.843	13.533	1.521	6	9.47	Copper	Paraffin oil	Piriproxifen	NA	NA	NA	NA	NA	NA	NA	NA	NA	NA	NA	NA	NA	NA	NA	NA	NA	NA	NA	NA	NA	NA	NA	NA	NA
ESP_AP15D	ESP_APP_15_A	Apis mellifera	Spain	Apple	38.04072	70.86	154.969	40.843	13.533	1.521	6	10.24	Copper	Paraffin oil	Piriproxifen	NA	NA	NA	NA	NA	NA	NA	NA	NA	NA	NA	NA	NA	NA	NA	NA	NA	NA	NA	NA	NA	NA	NA	NA	NA
ESP_AP15E	ESP_APP_15_A	Apis mellifera	Spain	Apple	38.04072	70.86	154.969	40.843	13.533	1.521	6	9.82	Copper	Paraffin oil	Piriproxifen	NA	NA	NA	NA	NA	NA	NA	NA	NA	NA	NA	NA	NA	NA	NA	NA	NA	NA	NA	NA	NA	NA	NA	NA	NA
ESP_AP16A	ESP_APP_16_A	Apis mellifera	Spain	Apple	38.02536	68.82	286.491	35.351	15.899	1.533	14.4	11.96	Copper hydroxide	Difenoconazole	Lambda-cyhalothrin	Paraffin oil	Piriproxifen	NA	NA	NA	NA	NA	NA	NA	NA	NA	NA	NA	NA	NA	NA	NA	NA	NA	NA	NA	NA	NA	NA	NA
ESP_AP16B	ESP_APP_16_A	Apis mellifera	Spain	Apple	38.02536	68.82	286.491	35.351	15.899	1.533	14.4	7.12	Copper hydroxide	Difenoconazole	Lambda-cyhalothrin	Paraffin oil	Piriproxifen	NA	NA	NA	NA	NA	NA	NA	NA	NA	NA	NA	NA	NA	NA	NA	NA	NA	NA	NA	NA	NA	NA	NA
ESP_AP16C	ESP_APP_16_A	Apis mellifera	Spain	Apple	38.02536	68.82	286.491	35.351	15.899	1.533	14.4	6.40	Copper hydroxide	Difenoconazole	Lambda-cyhalothrin	Paraffin oil	Piriproxifen	NA	NA	NA	NA	NA	NA	NA	NA	NA	NA	NA	NA	NA	NA	NA	NA	NA	NA	NA	NA	NA	NA	NA
ESP_AP16D	ESP_APP_16_A	Apis mellifera	Spain	Apple	38.02536	68.82	286.491	35.351	15.899	1.533	14.4	11.15	Copper hydroxide	Difenoconazole	Lambda-cyhalothrin	Paraffin oil	Piriproxifen	NA	NA	NA	NA	NA	NA	NA	NA	NA	NA	NA	NA	NA	NA	NA	NA	NA	NA	NA	NA	NA	NA	NA
ESP_AP16E	ESP_APP_16_A	Apis mellifera	Spain	Apple	38.02536	68.82	286.491	35.351	15.899	1.533	14.4	8.20	Copper hydroxide	Difenoconazole	Lambda-cyhalothrin	Paraffin oil	Piriproxifen	NA	NA	NA	NA	NA	NA	NA	NA	NA	NA	NA	NA	NA	NA	NA	NA	NA	NA	NA	NA	NA	NA	NA
ESP_B1A	ESP_OSR_01_B	Bombus terrestris	Spain	Oilseed rape	39.09556	65.14	76.194	7.23	0.469	1.078	18.3	6.61	Lambda-cyhalothrin	Metazachlor	Napropamide	NA	NA	NA	NA	NA	NA	NA	NA	NA	NA	NA	NA	NA	NA	NA	NA	NA	NA	NA	NA	NA	NA	NA	NA	NA
ESP_B1B	ESP_OSR_01_B	Bombus terrestris	Spain	Oilseed rape	39.09556	65.14	76.194	7.23	0.469	1.078	18.3	8.46	Lambda-cyhalothrin	Metazachlor	Napropamide	NA	NA	NA	NA	NA	NA	NA	NA	NA	NA	NA	NA	NA	NA	NA	NA	NA	NA	NA	NA	NA	NA	NA	NA	NA
ESP_B1C	ESP_OSR_01_B	Bombus terrestris	Spain	Oilseed rape	39.09556	65.14	76.194	7.23	0.469	1.078	18.3	7.19	Lambda-cyhalothrin	Metazachlor	Napropamide	NA	NA	NA	NA	NA	NA	NA	NA	NA	NA	NA	NA	NA	NA	NA	NA	NA	NA	NA	NA	NA	NA	NA	NA	NA
ESP_B1D	ESP_OSR_01_B	Bombus terrestris	Spain	Oilseed rape	39.09556	65.14	76.194	7.23	0.469	1.078	18.3	12.04	Lambda-cyhalothrin	Metazachlor	Napropamide	NA	NA	NA	NA	NA	NA	NA	NA	NA	NA	NA	NA	NA	NA	NA	NA	NA	NA	NA	NA	NA	NA	NA	NA	NA
ESP_B1E	ESP_OSR_01_B	Bombus terrestris	Spain	Oilseed rape	39.09556	65.14	76.194	7.23	0.469	1.078	18.3	7.32	Lambda-cyhalothrin	Metazachlor	Napropamide	NA	NA	NA	NA	NA	NA	NA	NA	NA	NA	NA	NA	NA	NA	NA	NA	NA	NA	NA	NA	NA	NA	NA	NA	NA
ESP_B2A	ESP_OSR_02_B	Bombus terrestris	Spain	Oilseed rape	39.02471	94.32	18.802	7.94	2.674	0.493	18.3	11.02	Lambda-cyhalothrin	Metazachlor	Napropamide	NA	NA	NA	NA	NA	NA	NA	NA	NA	NA	NA	NA	NA	NA	NA	NA	NA	NA	NA	NA	NA	NA	NA	NA	NA
ESP_B2B	ESP_OSR_02_B	Bombus terrestris	Spain	Oilseed rape	39.02471	94.32	18.802	7.94	2.674	0.493	18.3	8.50	Lambda-cyhalothrin	Metazachlor	Napropamide	NA	NA	NA	NA	NA	NA	NA	NA	NA	NA	NA	NA	NA	NA	NA	NA	NA	NA	NA	NA	NA	NA	NA	NA	NA
ESP_B2C	ESP_OSR_02_B	Bombus terrestris	Spain	Oilseed rape	39.02471	94.32	18.802	7.94	2.674	0.493	18.3	5.59	Lambda-cyhalothrin	Metazachlor	Napropamide	NA	NA	NA	NA	NA	NA	NA	NA	NA	NA	NA	NA	NA	NA	NA	NA	NA	NA	NA	NA	NA	NA	NA	NA	NA
ESP_B2D	ESP_OSR_02_B	Bombus terrestris	Spain	Oilseed rape	39.02471	94.32	18.802	7.94	2.674	0.493	18.3	10.78	Lambda-cyhalothrin	Metazachlor	Napropamide	NA	NA	NA	NA	NA	NA	NA	NA	NA	NA	NA	NA	NA	NA	NA	NA	NA	NA	NA	NA	NA	NA	NA	NA	NA
ESP_B2E	ESP_OSR_02_B	Bombus terrestris	Spain	Oilseed rape	39.02471	94.32	18.802	7.94	2.674	0.493	18.3	7.67	Lambda-cyhalothrin	Metazachlor	Napropamide	NA	NA	NA	NA	NA	NA	NA	NA	NA	NA	NA	NA	NA	NA	NA	NA	NA	NA	NA	NA	NA	NA	NA	NA	NA
ESP_B3A	ESP_OSR_03_B	Bombus terrestris	Spain	Oilseed rape	39.04158	92.79	48.473	6.982	1.954	0.352	18.3	5.09	Lambda-cyhalothrin	Metazachlor	Napropamide	NA	NA	NA	NA	NA	NA	NA	NA	NA	NA	NA	NA	NA	NA	NA	NA	NA	NA	NA	NA	NA	NA	NA	NA	NA
ESP_B3B	ESP_OSR_03_B	Bombus terrestris	Spain	Oilseed rape	39.04158	92.79	48.473	6.982	1.954	0.352	18.3	11.57	Lambda-cyhalothrin	Metazachlor	Napropamide	NA	NA	NA	NA	NA	NA	NA	NA	NA	NA	NA	NA	NA	NA	NA	NA	NA	NA	NA	NA	NA	NA	NA	NA	NA
ESP_B3C	ESP_OSR_03_B	Bombus terrestris	Spain	Oilseed rape	39.04158	92.79	48.473	6.982	1.954	0.352	18.3	11.11	Lambda-cyhalothrin	Metazachlor	Napropamide	NA	NA	NA	NA	NA	NA	NA	NA	NA	NA	NA	NA	NA	NA	NA	NA	NA	NA	NA	NA	NA	NA	NA	NA	NA
ESP_B3D	ESP_OSR_03_B	Bombus terrestris	Spain	Oilseed rape	39.04158	92.79	48.473	6.982	1.954	0.352	18.3	12.28	Lambda-cyhalothrin	Metazachlor	Napropamide	NA	NA	NA	NA	NA	NA	NA	NA	NA	NA	NA	NA	NA	NA	NA	NA	NA	NA	NA	NA	NA	NA	NA	NA	NA
ESP_B3E	ESP_OSR_03_B	Bombus terrestris	Spain	Oilseed rape	39.04158	92.79	48.473	6.982	1.954	0.352	18.3	11.22	Lambda-cyhalothrin	Metazachlor	Napropamide	NA	NA	NA	NA	NA	NA	NA	NA	NA	NA	NA	NA	NA	NA	NA	NA	NA	NA	NA	NA	NA	NA	NA	NA	NA
ESP_B4A	ESP_OSR_04_B	Bombus terrestris	Spain	Oilseed rape	39.06788	97.5	5.201	0.348	1.176	0.155	8.3	7.29	Metazachlor	Napropamide	NA	NA	NA	NA	NA	NA	NA	NA	NA	NA	NA	NA	NA	NA	NA	NA	NA	NA	NA	NA	NA	NA	NA	NA	NA	NA
ESP_B4B	ESP_OSR_04_B	Bombus terrestris	Spain	Oilseed rape	39.06788	97.5	5.201	0.348	1.176	0.155	8.3	8.57	Metazachlor	Napropamide	NA	NA	NA	NA	NA	NA	NA	NA	NA	NA	NA	NA	NA	NA	NA	NA	NA	NA	NA	NA	NA	NA	NA	NA	NA	NA
ESP_B4C	ESP_OSR_04_B	Bombus terrestris	Spain	Oilseed rape	39.06788	97.5	5.201	0.348	1.176	0.155	8.3	7.32	Metazachlor	Napropamide	NA	NA	NA	NA	NA	NA	NA	NA	NA	NA	NA	NA	NA	NA	NA	NA	NA	NA	NA	NA	NA	NA	NA	NA	NA	NA
ESP_B4D	ESP_OSR_04_B	Bombus terrestris	Spain	Oilseed rape	39.06788	97.5	5.201	0.348	1.176	0.155	8.3	10.34	Metazachlor	Napropamide	NA	NA	NA	NA	NA	NA	NA	NA	NA	NA	NA	NA	NA	NA	NA	NA	NA	NA	NA	NA	NA	NA	NA	NA	NA	NA
ESP_B4E	ESP_OSR_04_B	Bombus terrestris	Spain	Oilseed rape	39.06788	97.5	5.201	0.348	1.176	0.155	8.3	9.93	Metazachlor	Napropamide	NA	NA	NA	NA	NA	NA	NA	NA	NA	NA	NA	NA	NA	NA	NA	NA	NA	NA	NA	NA	NA	NA	NA	NA	NA	NA
ESP_B5A	ESP_OSR_05_B	Bombus terrestris	Spain	Oilseed rape	39.16504	93.85	49.225	7.668	0.311	0.302	18.8	4.28	Pirimicarb	Lambda-cyhalothrin	Metazachlor	Napropamide	NA	NA	NA	NA	NA	NA	NA	NA	NA	NA	NA	NA	NA	NA	NA	NA	NA	NA	NA	NA	NA	NA	NA	NA
ESP_B5B	ESP_OSR_05_B	Bombus terrestris	Spain	Oilseed rape	39.16504	93.85	49.225	7.668	0.311	0.302	18.8	9.54	Pirimicarb	Lambda-cyhalothrin	Metazachlor	Napropamide	NA	NA	NA	NA	NA	NA	NA	NA	NA	NA	NA	NA	NA	NA	NA	NA	NA	NA	NA	NA	NA	NA	NA	NA
ESP_B5C	ESP_OSR_05_B	Bombus terrestris	Spain	Oilseed rape	39.16504	93.85	49.225	7.668	0.311	0.302	18.8	6.72	Pirimicarb	Lambda-cyhalothrin	Metazachlor	Napropamide	NA	NA	NA	NA	NA	NA	NA	NA	NA	NA	NA	NA	NA	NA	NA	NA	NA	NA	NA	NA	NA	NA	NA	NA
ESP_B5D	ESP_OSR_05_B	Bombus terrestris	Spain	Oilseed rape	39.16504	93.85	49.225	7.668	0.311	0.302	18.8	8.17	Pirimicarb	Lambda-cyhalothrin	Metazachlor	Napropamide	NA	NA	NA	NA	NA	NA	NA	NA	NA	NA	NA	NA	NA	NA	NA	NA	NA	NA	NA	NA	NA	NA	NA	NA
ESP_B5E	ESP_OSR_05_B	Bombus terrestris	Spain	Oilseed rape	39.16504	93.85	49.225	7.668	0.311	0.302	18.8	8.25	Pirimicarb	Lambda-cyhalothrin	Metazachlor	Napropamide	NA	NA	NA	NA	NA	NA	NA	NA	NA	NA	NA	NA	NA	NA	NA	NA	NA	NA	NA	NA	NA	NA	NA	NA
ESP_B6A	ESP_OSR_06_B	Bombus terrestris	Spain	Oilseed rape	39.16504	93.85	49.225	7.668	0.311	0.302	18.3	11.47	Lambda-cyhalothrin	Metazachlor	Napropamide	NA	NA	NA	NA	NA	NA	NA	NA	NA	NA	NA	NA	NA	NA	NA	NA	NA	NA	NA	NA	NA	NA	NA	NA	NA
ESP_B6B	ESP_OSR_06_B	Bombus terrestris	Spain	Oilseed rape	39.16504	93.85	49.225	7.668	0.311	0.302	18.3	9.00	Lambda-cyhalothrin	Metazachlor	Napropamide	NA	NA	NA	NA	NA	NA	NA	NA	NA	NA	NA	NA	NA	NA	NA	NA	NA	NA	NA	NA	NA	NA	NA	NA	NA
ESP_B6C	ESP_OSR_06_B	Bombus terrestris	Spain	Oilseed rape	39.16504	93.85	49.225	7.668	0.311	0.302	18.3	12.58	Lambda-cyhalothrin	Metazachlor	Napropamide	NA	NA	NA	NA	NA	NA	NA	NA	NA	NA	NA	NA	NA	NA	NA	NA	NA	NA	NA	NA	NA	NA	NA	NA	NA
ESP_B6D	ESP_OSR_06_B	Bombus terrestris	Spain	Oilseed rape	39.16504	93.85	49.225	7.668	0.311	0.302	18.3	9.16	Lambda-cyhalothrin	Metazachlor	Napropamide	NA	NA	NA	NA	NA	NA	NA	NA	NA	NA	NA	NA	NA	NA	NA	NA	NA	NA	NA	NA	NA	NA	NA	NA	NA
ESP_B6E	ESP_OSR_06_B	Bombus terrestris	Spain	Oilseed rape	39.16504	93.85	49.225	7.668	0.311	0.302	18.3	12.07	Lambda-cyhalothrin	Metazachlor	Napropamide	NA	NA	NA	NA	NA	NA	NA	NA	NA	NA	NA	NA	NA	NA	NA	NA	NA	NA	NA	NA	NA	NA	NA	NA	NA
ESP_B7A	ESP_OSR_07_B	Bombus terrestris	Spain	Oilseed rape	38.95955	93.43	35.667	6.062	0.968	0.683	18.3	5.98	Lambda-cyhalothrin	Metazachlor	Napropamide	NA	NA	NA	NA	NA	NA	NA	NA	NA	NA	NA	NA	NA	NA	NA	NA	NA	NA	NA	NA	NA	NA	NA	NA	NA
ESP_B7B	ESP_OSR_07_B	Bombus terrestris	Spain	Oilseed rape	38.95955	93.43	35.667	6.062	0.968	0.683	18.3	8.20	Lambda-cyhalothrin	Metazachlor	Napropamide	NA	NA	NA	NA	NA	NA	NA	NA	NA	NA	NA	NA	NA	NA	NA	NA	NA	NA	NA	NA	NA	NA	NA	NA	NA
ESP_B7C	ESP_OSR_07_B	Bombus terrestris	Spain	Oilseed rape	38.95955	93.43	35.667	6.062	0.968	0.683	18.3	6.15	Lambda-cyhalothrin	Metazachlor	Napropamide	NA	NA	NA	NA	NA	NA	NA	NA	NA	NA	NA	NA	NA	NA	NA	NA	NA	NA	NA	NA	NA	NA	NA	NA	NA
ESP_B7D	ESP_OSR_07_B	Bombus terrestris	Spain	Oilseed rape	38.95955	93.43	35.667	6.062	0.968	0.683	18.3	6.73	Lambda-cyhalothrin	Metazachlor	Napropamide	NA	NA	NA	NA	NA	NA	NA	NA	NA	NA	NA	NA	NA	NA	NA	NA	NA	NA	NA	NA	NA	NA	NA	NA	NA
ESP_B7E	ESP_OSR_07_B	Bombus terrestris	Spain	Oilseed rape	38.95955	93.43	35.667	6.062	0.968	0.683	18.3	7.69	Lambda-cyhalothrin	Metazachlor	Napropamide	NA	NA	NA	NA	NA	NA	NA	NA	NA	NA	NA	NA	NA	NA	NA	NA	NA	NA	NA	NA	NA	NA	NA	NA	NA
ESP_B8A	ESP_OSR_08_B	Bombus terrestris	Spain	Oilseed rape	39.20516	97.41	10.664	0.63	0.129	0.345	18.3	7.83	Lambda-cyhalothrin	Metazachlor	Napropamide	NA	NA	NA	NA	NA	NA	NA	NA	NA	NA	NA	NA	NA	NA	NA	NA	NA	NA	NA	NA	NA	NA	NA	NA	NA
ESP_B8B	ESP_OSR_08_B	Bombus terrestris	Spain	Oilseed rape	39.20516	97.41	10.664	0.63	0.129	0.345	18.3	11.19	Lambda-cyhalothrin	Metazachlor	Napropamide	NA	NA	NA	NA	NA	NA	NA	NA	NA	NA	NA	NA	NA	NA	NA	NA	NA	NA	NA	NA	NA	NA	NA	NA	NA
ESP_B8C	ESP_OSR_08_B	Bombus terrestris	Spain	Oilseed rape	39.20516	97.41	10.664	0.63	0.129	0.345	18.3	9.92	Lambda-cyhalothrin	Metazachlor	Napropamide	NA	NA	NA	NA	NA	NA	NA	NA	NA	NA	NA	NA	NA	NA	NA	NA	NA	NA	NA	NA	NA	NA	NA	NA	NA
ESP_B8D	ESP_OSR_08_B	Bombus terrestris	Spain	Oilseed rape	39.20516	97.41	10.664	0.63	0.129	0.345	18.3	11.60	Lambda-cyhalothrin	Metazachlor	Napropamide	NA	NA	NA	NA	NA	NA	NA	NA	NA	NA	NA	NA	NA	NA	NA	NA	NA	NA	NA	NA	NA	NA	NA	NA	NA
ESP_B8E	ESP_OSR_08_B	Bombus terrestris	Spain	Oilseed rape	39.20516	97.41	10.664	0.63	0.129	0.345	18.3	9.94	Lambda-cyhalothrin	Metazachlor	Napropamide	NA	NA	NA	NA	NA	NA	NA	NA	NA	NA	NA	NA	NA	NA	NA	NA	NA	NA	NA	NA	NA	NA	NA	NA	NA
ESP_B9A	ESP_APP_09_B	Bombus terrestris	Spain	Apple	38.00804	50.15	242.661	41.984	62.331	1.596	13.38	6.44	Copper hydroxide	Paraffin oil	Spinosad	Sulphur	NA	NA	NA	NA	NA	NA	NA	NA	NA	NA	NA	NA	NA	NA	NA	NA	NA	NA	NA	NA	NA	NA	NA	NA
ESP_B9B	ESP_APP_09_B	Bombus terrestris	Spain	Apple	38.00804	50.15	242.661	41.984	62.331	1.596	13.38	8.12	Copper hydroxide	Paraffin oil	Spinosad	Sulphur	NA	NA	NA	NA	NA	NA	NA	NA	NA	NA	NA	NA	NA	NA	NA	NA	NA	NA	NA	NA	NA	NA	NA	NA
ESP_B9C	ESP_APP_09_B	Bombus terrestris	Spain	Apple	38.00804	50.15	242.661	41.984	62.331	1.596	13.38	7.42	Copper hydroxide	Paraffin oil	Spinosad	Sulphur	NA	NA	NA	NA	NA	NA	NA	NA	NA	NA	NA	NA	NA	NA	NA	NA	NA	NA	NA	NA	NA	NA	NA	NA
ESP_B9D	ESP_APP_09_B	Bombus terrestris	Spain	Apple	38.00804	50.15	242.661	41.984	62.331	1.596	13.38	8.87	Copper hydroxide	Paraffin oil	Spinosad	Sulphur	NA	NA	NA	NA	NA	NA	NA	NA	NA	NA	NA	NA	NA	NA	NA	NA	NA	NA	NA	NA	NA	NA	NA	NA
ESP_B9E	ESP_APP_09_B	Bombus terrestris	Spain	Apple	38.00804	50.15	242.661	41.984	62.331	1.596	13.38	11.64	Copper hydroxide	Paraffin oil	Spinosad	Sulphur	NA	NA	NA	NA	NA	NA	NA	NA	NA	NA	NA	NA	NA	NA	NA	NA	NA	NA	NA	NA	NA	NA	NA	NA
ESP_B10A	ESP_APP_10_B	Bombus terrestris	Spain	Apple	38.09006	29.27	330.985	82.128	76.198	1.717	8.5	9.20	Copper	Lambda-cyhalothrin	Paraffin oil	NA	NA	NA	NA	NA	NA	NA	NA	NA	NA	NA	NA	NA	NA	NA	NA	NA	NA	NA	NA	NA	NA	NA	NA	NA
ESP_B10B	ESP_APP_10_B	Bombus terrestris	Spain	Apple	38.09006	29.27	330.985	82.128	76.198	1.717	8.5	8.64	Copper	Lambda-cyhalothrin	Paraffin oil	NA	NA	NA	NA	NA	NA	NA	NA	NA	NA	NA	NA	NA	NA	NA	NA	NA	NA	NA	NA	NA	NA	NA	NA	NA
ESP_B10C	ESP_APP_10_B	Bombus terrestris	Spain	Apple	38.09006	29.27	330.985	82.128	76.198	1.717	8.5	8.63	Copper	Lambda-cyhalothrin	Paraffin oil	NA	NA	NA	NA	NA	NA	NA	NA	NA	NA	NA	NA	NA	NA	NA	NA	NA	NA	NA	NA	NA	NA	NA	NA	NA
ESP_B10D	ESP_APP_10_B	Bombus terrestris	Spain	Apple	38.09006	29.27	330.985	82.128	76.198	1.717	8.5	8.74	Copper	Lambda-cyhalothrin	Paraffin oil	NA	NA	NA	NA	NA	NA	NA	NA	NA	NA	NA	NA	NA	NA	NA	NA	NA	NA	NA	NA	NA	NA	NA	NA	NA
ESP_B10E	ESP_APP_10_B	Bombus terrestris	Spain	Apple	38.09006	29.27	330.985	82.128	76.198	1.717	8.5	10.03	Copper	Lambda-cyhalothrin	Paraffin oil	NA	NA	NA	NA	NA	NA	NA	NA	NA	NA	NA	NA	NA	NA	NA	NA	NA	NA	NA	NA	NA	NA	NA	NA	NA
ESP_B11A	ESP_APP_11_B	Bombus terrestris	Spain	Apple	37.98518	31.96	118.449	13.015	1.059	1.105	19.6	8.48	Phosmet	Pyriproxyfen	Cyprodinil	Cyflufenamid	Copper hydroxide	Penconazole	Lambda-cyhalothrin	Tau-fluvalinate	Paraffin oil	Difenoconazole	Flonicamid	Chloranthraniliprole	Mancozeb	Abamectin	NA	NA	NA	NA	NA	NA	NA	NA	NA	NA	NA	NA	NA	NA
ESP_B11B	ESP_APP_11_B	Bombus terrestris	Spain	Apple	37.98518	31.96	118.449	13.015	1.059	1.105	19.6	10.14	Phosmet	Pyriproxyfen	Cyprodinil	Cyflufenamid	Copper hydroxide	Penconazole	Lambda-cyhalothrin	Tau-fluvalinate	Paraffin oil	Difenoconazole	Flonicamid	Chloranthraniliprole	Mancozeb	Abamectin	NA	NA	NA	NA	NA	NA	NA	NA	NA	NA	NA	NA	NA	NA
ESP_B11C	ESP_APP_11_B	Bombus terrestris	Spain	Apple	37.98518	31.96	118.449	13.015	1.059	1.105	19.6	9.45	Phosmet	Pyriproxyfen	Cyprodinil	Cyflufenamid	Copper hydroxide	Penconazole	Lambda-cyhalothrin	Tau-fluvalinate	Paraffin oil	Difenoconazole	Flonicamid	Chloranthraniliprole	Mancozeb	Abamectin	NA	NA	NA	NA	NA	NA	NA	NA	NA	NA	NA	NA	NA	NA
ESP_B11D	ESP_APP_11_B	Bombus terrestris	Spain	Apple	37.98518	31.96	118.449	13.015	1.059	1.105	19.6	8.33	Phosmet	Pyriproxyfen	Cyprodinil	Cyflufenamid	Copper hydroxide	Penconazole	Lambda-cyhalothrin	Tau-fluvalinate	Paraffin oil	Difenoconazole	Flonicamid	Chloranthraniliprole	Mancozeb	Abamectin	NA	NA	NA	NA	NA	NA	NA	NA	NA	NA	NA	NA	NA	NA
ESP_B11E	ESP_APP_11_B	Bombus terrestris	Spain	Apple	37.98518	31.96	118.449	13.015	1.059	1.105	19.6	9.22	Phosmet	Pyriproxyfen	Cyprodinil	Cyflufenamid	Copper hydroxide	Penconazole	Lambda-cyhalothrin	Tau-fluvalinate	Paraffin oil	Difenoconazole	Flonicamid	Chloranthraniliprole	Mancozeb	Abamectin	NA	NA	NA	NA	NA	NA	NA	NA	NA	NA	NA	NA	NA	NA
ESP_B12A	ESP_APP_12_B	Bombus terrestris	Spain	Apple	38.10025	85.38	67.855	11.637	0.943	0.599	17.2	7.62	Deltamethrin	Abamectin	Beta-cyfluthrin	Copper oxychloride	Pyriproxyfen	Acetamiprid	Spirotetramat	Myclobutanil	NA	NA	NA	NA	NA	NA	NA	NA	NA	NA	NA	NA	NA	NA	NA	NA	NA	NA	NA	NA
ESP_B12B	ESP_APP_12_B	Bombus terrestris	Spain	Apple	38.10025	85.38	67.855	11.637	0.943	0.599	17.2	12.34	Deltamethrin	Abamectin	Beta-cyfluthrin	Copper oxychloride	Pyriproxyfen	Acetamiprid	Spirotetramat	Myclobutanil	NA	NA	NA	NA	NA	NA	NA	NA	NA	NA	NA	NA	NA	NA	NA	NA	NA	NA	NA	NA
ESP_B12C	ESP_APP_12_B	Bombus terrestris	Spain	Apple	38.10025	85.38	67.855	11.637	0.943	0.599	17.2	10.66	Deltamethrin	Abamectin	Beta-cyfluthrin	Copper oxychloride	Pyriproxyfen	Acetamiprid	Spirotetramat	Myclobutanil	NA	NA	NA	NA	NA	NA	NA	NA	NA	NA	NA	NA	NA	NA	NA	NA	NA	NA	NA	NA
ESP_B12D	ESP_APP_12_B	Bombus terrestris	Spain	Apple	38.10025	85.38	67.855	11.637	0.943	0.599	17.2	8.56	Deltamethrin	Abamectin	Beta-cyfluthrin	Copper oxychloride	Pyriproxyfen	Acetamiprid	Spirotetramat	Myclobutanil	NA	NA	NA	NA	NA	NA	NA	NA	NA	NA	NA	NA	NA	NA	NA	NA	NA	NA	NA	NA
ESP_B12E	ESP_APP_12_B	Bombus terrestris	Spain	Apple	38.10025	85.38	67.855	11.637	0.943	0.599	17.2	10.16	Deltamethrin	Abamectin	Beta-cyfluthrin	Copper oxychloride	Pyriproxyfen	Acetamiprid	Spirotetramat	Myclobutanil	NA	NA	NA	NA	NA	NA	NA	NA	NA	NA	NA	NA	NA	NA	NA	NA	NA	NA	NA	NA
ESP_B13A	ESP_APP_13_B	Bombus terrestris	Spain	Apple	38.00838	73.31	157.649	29.418	4.623	1.464	13.95	7.61	Phosmet	Deltamethrin	Lambda-cyhalothrin	Copper	Paraffin Oil	Piriproxifen	Flonicamid	NA	NA	NA	NA	NA	NA	NA	NA	NA	NA	NA	NA	NA	NA	NA	NA	NA	NA	NA	NA	NA
ESP_B13B	ESP_APP_13_B	Bombus terrestris	Spain	Apple	38.00838	73.31	157.649	29.418	4.623	1.464	13.95	8.46	Phosmet	Deltamethrin	Lambda-cyhalothrin	Copper	Paraffin Oil	Piriproxifen	Flonicamid	NA	NA	NA	NA	NA	NA	NA	NA	NA	NA	NA	NA	NA	NA	NA	NA	NA	NA	NA	NA	NA
ESP_B13C	ESP_APP_13_B	Bombus terrestris	Spain	Apple	38.00838	73.31	157.649	29.418	4.623	1.464	13.95	5.06	Phosmet	Deltamethrin	Lambda-cyhalothrin	Copper	Paraffin Oil	Piriproxifen	Flonicamid	NA	NA	NA	NA	NA	NA	NA	NA	NA	NA	NA	NA	NA	NA	NA	NA	NA	NA	NA	NA	NA
ESP_B13D	ESP_APP_13_B	Bombus terrestris	Spain	Apple	38.00838	73.31	157.649	29.418	4.623	1.464	13.95	4.82	Phosmet	Deltamethrin	Lambda-cyhalothrin	Copper	Paraffin Oil	Piriproxifen	Flonicamid	NA	NA	NA	NA	NA	NA	NA	NA	NA	NA	NA	NA	NA	NA	NA	NA	NA	NA	NA	NA	NA
ESP_B13E	ESP_APP_13_B	Bombus terrestris	Spain	Apple	38.00838	73.31	157.649	29.418	4.623	1.464	13.95	7.59	Phosmet	Deltamethrin	Lambda-cyhalothrin	Copper	Paraffin Oil	Piriproxifen	Flonicamid	NA	NA	NA	NA	NA	NA	NA	NA	NA	NA	NA	NA	NA	NA	NA	NA	NA	NA	NA	NA	NA
ESP_B14A	ESP_APP_14_B	Bombus terrestris	Spain	Apple	38.25881	79.2	92.039	23.776	1.44	0.772	33.1	10.67	Copper hydroxide	Paraffin oil	Deltamethrin	Difenoconazole	Dodine	Tau-fluvalinate	Piriproxifen	NA	NA	NA	NA	NA	NA	NA	NA	NA	NA	NA	NA	NA	NA	NA	NA	NA	NA	NA	NA	NA
ESP_B14B	ESP_APP_14_B	Bombus terrestris	Spain	Apple	38.25881	79.2	92.039	23.776	1.44	0.772	33.1	12.50	Copper hydroxide	Paraffin oil	Deltamethrin	Difenoconazole	Dodine	Tau-fluvalinate	Piriproxifen	NA	NA	NA	NA	NA	NA	NA	NA	NA	NA	NA	NA	NA	NA	NA	NA	NA	NA	NA	NA	NA
ESP_B14C	ESP_APP_14_B	Bombus terrestris	Spain	Apple	38.25881	79.2	92.039	23.776	1.44	0.772	33.1	7.88	Copper hydroxide	Paraffin oil	Deltamethrin	Difenoconazole	Dodine	Tau-fluvalinate	Piriproxifen	NA	NA	NA	NA	NA	NA	NA	NA	NA	NA	NA	NA	NA	NA	NA	NA	NA	NA	NA	NA	NA
ESP_B14D	ESP_APP_14_B	Bombus terrestris	Spain	Apple	38.25881	79.2	92.039	23.776	1.44	0.772	33.1	6.28	Copper hydroxide	Paraffin oil	Deltamethrin	Difenoconazole	Dodine	Tau-fluvalinate	Piriproxifen	NA	NA	NA	NA	NA	NA	NA	NA	NA	NA	NA	NA	NA	NA	NA	NA	NA	NA	NA	NA	NA
ESP_B14E	ESP_APP_14_B	Bombus terrestris	Spain	Apple	38.25881	79.2	92.039	23.776	1.44	0.772	33.1	6.96	Copper hydroxide	Paraffin oil	Deltamethrin	Difenoconazole	Dodine	Tau-fluvalinate	Piriproxifen	NA	NA	NA	NA	NA	NA	NA	NA	NA	NA	NA	NA	NA	NA	NA	NA	NA	NA	NA	NA	NA
ESP_B15A	ESP_APP_15_B	Bombus terrestris	Spain	Apple	38.04072	70.86	154.969	40.843	13.533	1.521	6	10.51	Copper	Paraffin oil	Piriproxifen	NA	NA	NA	NA	NA	NA	NA	NA	NA	NA	NA	NA	NA	NA	NA	NA	NA	NA	NA	NA	NA	NA	NA	NA	NA
ESP_B15B	ESP_APP_15_B	Bombus terrestris	Spain	Apple	38.04072	70.86	154.969	40.843	13.533	1.521	6	8.39	Copper	Paraffin oil	Piriproxifen	NA	NA	NA	NA	NA	NA	NA	NA	NA	NA	NA	NA	NA	NA	NA	NA	NA	NA	NA	NA	NA	NA	NA	NA	NA
ESP_B15C	ESP_APP_15_B	Bombus terrestris	Spain	Apple	38.04072	70.86	154.969	40.843	13.533	1.521	6	8.90	Copper	Paraffin oil	Piriproxifen	NA	NA	NA	NA	NA	NA	NA	NA	NA	NA	NA	NA	NA	NA	NA	NA	NA	NA	NA	NA	NA	NA	NA	NA	NA
ESP_B15D	ESP_APP_15_B	Bombus terrestris	Spain	Apple	38.04072	70.86	154.969	40.843	13.533	1.521	6	6.54	Copper	Paraffin oil	Piriproxifen	NA	NA	NA	NA	NA	NA	NA	NA	NA	NA	NA	NA	NA	NA	NA	NA	NA	NA	NA	NA	NA	NA	NA	NA	NA
ESP_B15E	ESP_APP_15_B	Bombus terrestris	Spain	Apple	38.04072	70.86	154.969	40.843	13.533	1.521	6	10.70	Copper	Paraffin oil	Piriproxifen	NA	NA	NA	NA	NA	NA	NA	NA	NA	NA	NA	NA	NA	NA	NA	NA	NA	NA	NA	NA	NA	NA	NA	NA	NA
ESP_B16A	ESP_APP_16_B	Bombus terrestris	Spain	Apple	38.02536	68.82	286.491	35.351	15.899	1.533	14.4	6.60	Copper hydroxide	Difenoconazole	Lambda-cyhalothrin	Paraffin oil	Piriproxifen	NA	NA	NA	NA	NA	NA	NA	NA	NA	NA	NA	NA	NA	NA	NA	NA	NA	NA	NA	NA	NA	NA	NA
ESP_B16B	ESP_APP_16_B	Bombus terrestris	Spain	Apple	38.02536	68.82	286.491	35.351	15.899	1.533	14.4	7.75	Copper hydroxide	Difenoconazole	Lambda-cyhalothrin	Paraffin oil	Piriproxifen	NA	NA	NA	NA	NA	NA	NA	NA	NA	NA	NA	NA	NA	NA	NA	NA	NA	NA	NA	NA	NA	NA	NA
ESP_B16C	ESP_APP_16_B	Bombus terrestris	Spain	Apple	38.02536	68.82	286.491	35.351	15.899	1.533	14.4	6.99	Copper hydroxide	Difenoconazole	Lambda-cyhalothrin	Paraffin oil	Piriproxifen	NA	NA	NA	NA	NA	NA	NA	NA	NA	NA	NA	NA	NA	NA	NA	NA	NA	NA	NA	NA	NA	NA	NA
ESP_B16D	ESP_APP_16_B	Bombus terrestris	Spain	Apple	38.02536	68.82	286.491	35.351	15.899	1.533	14.4	7.53	Copper hydroxide	Difenoconazole	Lambda-cyhalothrin	Paraffin oil	Piriproxifen	NA	NA	NA	NA	NA	NA	NA	NA	NA	NA	NA	NA	NA	NA	NA	NA	NA	NA	NA	NA	NA	NA	NA
ESP_B16E	ESP_APP_16_B	Bombus terrestris	Spain	Apple	38.02536	68.82	286.491	35.351	15.899	1.533	14.4	8.55	Copper hydroxide	Difenoconazole	Lambda-cyhalothrin	Paraffin oil	Piriproxifen	NA	NA	NA	NA	NA	NA	NA	NA	NA	NA	NA	NA	NA	NA	NA	NA	NA	NA	NA	NA	NA	NA	NA
SWE_AP1A	SWE_OSR_01_A	Apis mellifera	Sweden	Oilseed rape	55.55904	88.77	116.829	18.673	2.356	0.503	NA	5.77	NA	NA	NA	NA	NA	NA	NA	NA	NA	NA	NA	NA	NA	NA	NA	NA	NA	NA	NA	NA	NA	NA	NA	NA	NA	NA	NA	NA
SWE_AP1B	SWE_OSR_01_A	Apis mellifera	Sweden	Oilseed rape	55.55904	88.77	116.829	18.673	2.356	0.503	NA	14.89	NA	NA	NA	NA	NA	NA	NA	NA	NA	NA	NA	NA	NA	NA	NA	NA	NA	NA	NA	NA	NA	NA	NA	NA	NA	NA	NA	NA
SWE_AP1C	SWE_OSR_01_A	Apis mellifera	Sweden	Oilseed rape	55.55904	88.77	116.829	18.673	2.356	0.503	NA	13.33	NA	NA	NA	NA	NA	NA	NA	NA	NA	NA	NA	NA	NA	NA	NA	NA	NA	NA	NA	NA	NA	NA	NA	NA	NA	NA	NA	NA
SWE_AP1D	SWE_OSR_01_A	Apis mellifera	Sweden	Oilseed rape	55.55904	88.77	116.829	18.673	2.356	0.503	NA	15.25	NA	NA	NA	NA	NA	NA	NA	NA	NA	NA	NA	NA	NA	NA	NA	NA	NA	NA	NA	NA	NA	NA	NA	NA	NA	NA	NA	NA
SWE_AP1E	SWE_OSR_01_A	Apis mellifera	Sweden	Oilseed rape	55.55904	88.77	116.829	18.673	2.356	0.503	NA	6.52	NA	NA	NA	NA	NA	NA	NA	NA	NA	NA	NA	NA	NA	NA	NA	NA	NA	NA	NA	NA	NA	NA	NA	NA	NA	NA	NA	NA
SWE_AP2A	SWE_OSR_02_A	Apis mellifera	Sweden	Oilseed rape	55.45282	90.81	94.395	8.106	6.144	0.443	NA	16.33	NA	NA	NA	NA	NA	NA	NA	NA	NA	NA	NA	NA	NA	NA	NA	NA	NA	NA	NA	NA	NA	NA	NA	NA	NA	NA	NA	NA
SWE_AP2B	SWE_OSR_02_A	Apis mellifera	Sweden	Oilseed rape	55.45282	90.81	94.395	8.106	6.144	0.443	NA	11.48	NA	NA	NA	NA	NA	NA	NA	NA	NA	NA	NA	NA	NA	NA	NA	NA	NA	NA	NA	NA	NA	NA	NA	NA	NA	NA	NA	NA
SWE_AP2C	SWE_OSR_02_A	Apis mellifera	Sweden	Oilseed rape	55.45282	90.81	94.395	8.106	6.144	0.443	NA	11.76	NA	NA	NA	NA	NA	NA	NA	NA	NA	NA	NA	NA	NA	NA	NA	NA	NA	NA	NA	NA	NA	NA	NA	NA	NA	NA	NA	NA
SWE_AP2D	SWE_OSR_02_A	Apis mellifera	Sweden	Oilseed rape	55.45282	90.81	94.395	8.106	6.144	0.443	NA	14.55	NA	NA	NA	NA	NA	NA	NA	NA	NA	NA	NA	NA	NA	NA	NA	NA	NA	NA	NA	NA	NA	NA	NA	NA	NA	NA	NA	NA
SWE_AP2E	SWE_OSR_02_A	Apis mellifera	Sweden	Oilseed rape	55.45282	90.81	94.395	8.106	6.144	0.443	NA	8.16	NA	NA	NA	NA	NA	NA	NA	NA	NA	NA	NA	NA	NA	NA	NA	NA	NA	NA	NA	NA	NA	NA	NA	NA	NA	NA	NA	NA
SWE_A3A	SWE_OSR_03_A	Apis mellifera	Sweden	Oilseed rape	56.00003	62.66	263.967	50.515	6.619	1.138	0.95	7.20	Picloram	Halauxifen-methyl	Alpha-cypermethrin	Clethodim	NA	NA	NA	NA	NA	NA	NA	NA	NA	NA	NA	NA	NA	NA	NA	NA	NA	NA	NA	NA	NA	NA	NA	NA
SWE_AP3B	SWE_OSR_03_A	Apis mellifera	Sweden	Oilseed rape	56.00003	62.66	263.967	50.515	6.619	1.138	0.95	8.18	Picloram	Halauxifen-methyl	Alpha-cypermethrin	Clethodim	NA	NA	NA	NA	NA	NA	NA	NA	NA	NA	NA	NA	NA	NA	NA	NA	NA	NA	NA	NA	NA	NA	NA	NA
SWE_AP3C	SWE_OSR_03_A	Apis mellifera	Sweden	Oilseed rape	56.00003	62.66	263.967	50.515	6.619	1.138	0.95	12.24	Picloram	Halauxifen-methyl	Alpha-cypermethrin	Clethodim	NA	NA	NA	NA	NA	NA	NA	NA	NA	NA	NA	NA	NA	NA	NA	NA	NA	NA	NA	NA	NA	NA	NA	NA
SWE_AP3D	SWE_OSR_03_A	Apis mellifera	Sweden	Oilseed rape	56.00003	62.66	263.967	50.515	6.619	1.138	0.95	15.22	Picloram	Halauxifen-methyl	Alpha-cypermethrin	Clethodim	NA	NA	NA	NA	NA	NA	NA	NA	NA	NA	NA	NA	NA	NA	NA	NA	NA	NA	NA	NA	NA	NA	NA	NA
SWE_AP3E	SWE_OSR_03_A	Apis mellifera	Sweden	Oilseed rape	56.00003	62.66	263.967	50.515	6.619	1.138	0.95	15.38	Picloram	Halauxifen-methyl	Alpha-cypermethrin	Clethodim	NA	NA	NA	NA	NA	NA	NA	NA	NA	NA	NA	NA	NA	NA	NA	NA	NA	NA	NA	NA	NA	NA	NA	NA
SWE_AP4A	SWE_OSR_04_A	Apis mellifera	Sweden	Oilseed rape	55.56433	93.83	48.443	7.903	2.619	0.318	0.75	12.90	NA	NA	NA	NA	NA	NA	NA	NA	NA	NA	NA	NA	NA	NA	NA	NA	NA	NA	NA	NA	NA	NA	NA	NA	NA	NA	NA	NA
SWE_AP4B	SWE_OSR_04_A	Apis mellifera	Sweden	Oilseed rape	55.56433	93.83	48.443	7.903	2.619	0.318	0.75	10.38	NA	NA	NA	NA	NA	NA	NA	NA	NA	NA	NA	NA	NA	NA	NA	NA	NA	NA	NA	NA	NA	NA	NA	NA	NA	NA	NA	NA
SWE_AP4C	SWE_OSR_04_A	Apis mellifera	Sweden	Oilseed rape	55.56433	93.83	48.443	7.903	2.619	0.318	0.75	11.11	NA	NA	NA	NA	NA	NA	NA	NA	NA	NA	NA	NA	NA	NA	NA	NA	NA	NA	NA	NA	NA	NA	NA	NA	NA	NA	NA	NA
SWE_AP4D	SWE_OSR_04_A	Apis mellifera	Sweden	Oilseed rape	55.56433	93.83	48.443	7.903	2.619	0.318	0.75	13.86	NA	NA	NA	NA	NA	NA	NA	NA	NA	NA	NA	NA	NA	NA	NA	NA	NA	NA	NA	NA	NA	NA	NA	NA	NA	NA	NA	NA
SWE_AP4E	SWE_OSR_04_A	Apis mellifera	Sweden	Oilseed rape	55.56433	93.83	48.443	7.903	2.619	0.318	0.75	14.63	NA	NA	NA	NA	NA	NA	NA	NA	NA	NA	NA	NA	NA	NA	NA	NA	NA	NA	NA	NA	NA	NA	NA	NA	NA	NA	NA	NA
SWE_AP5A	SWE_OSR_05_A	Apis mellifera	Sweden	Oilseed rape	55.82475	83.67	139.089	18.19	9.077	0.678	3.15	12.50	Indoxacarb	Picloram	Halauxifen-methyl	Boscalid	NA	NA	NA	NA	NA	NA	NA	NA	NA	NA	NA	NA	NA	NA	NA	NA	NA	NA	NA	NA	NA	NA	NA	NA
SWE_AP5B	SWE_OSR_05_A	Apis mellifera	Sweden	Oilseed rape	55.82475	83.67	139.089	18.19	9.077	0.678	3.15	15.15	Indoxacarb	Picloram	Halauxifen-methyl	Boscalid	NA	NA	NA	NA	NA	NA	NA	NA	NA	NA	NA	NA	NA	NA	NA	NA	NA	NA	NA	NA	NA	NA	NA	NA
SWE_AP5C	SWE_OSR_05_A	Apis mellifera	Sweden	Oilseed rape	55.82475	83.67	139.089	18.19	9.077	0.678	3.15	11.88	Indoxacarb	Picloram	Halauxifen-methyl	Boscalid	NA	NA	NA	NA	NA	NA	NA	NA	NA	NA	NA	NA	NA	NA	NA	NA	NA	NA	NA	NA	NA	NA	NA	NA
SWE_AP5D	SWE_OSR_05_A	Apis mellifera	Sweden	Oilseed rape	55.82475	83.67	139.089	18.19	9.077	0.678	3.15	10.29	Indoxacarb	Picloram	Halauxifen-methyl	Boscalid	NA	NA	NA	NA	NA	NA	NA	NA	NA	NA	NA	NA	NA	NA	NA	NA	NA	NA	NA	NA	NA	NA	NA	NA
SWE_AP5E	SWE_OSR_05_A	Apis mellifera	Sweden	Oilseed rape	55.82475	83.67	139.089	18.19	9.077	0.678	3.15	11.54	Indoxacarb	Picloram	Halauxifen-methyl	Boscalid	NA	NA	NA	NA	NA	NA	NA	NA	NA	NA	NA	NA	NA	NA	NA	NA	NA	NA	NA	NA	NA	NA	NA	NA
SWE_AP6A	SWE_OSR_06_A	Apis mellifera	Sweden	Oilseed rape	55.53666	93.69	78.939	5.514	3.6	0.329	NA	15.22	NA	NA	NA	NA	NA	NA	NA	NA	NA	NA	NA	NA	NA	NA	NA	NA	NA	NA	NA	NA	NA	NA	NA	NA	NA	NA	NA	NA
SWE_AP6B	SWE_OSR_06_A	Apis mellifera	Sweden	Oilseed rape	55.53666	93.69	78.939	5.514	3.6	0.329	NA	13.73	NA	NA	NA	NA	NA	NA	NA	NA	NA	NA	NA	NA	NA	NA	NA	NA	NA	NA	NA	NA	NA	NA	NA	NA	NA	NA	NA	NA
SWE_AP6C	SWE_OSR_06_A	Apis mellifera	Sweden	Oilseed rape	55.53666	93.69	78.939	5.514	3.6	0.329	NA	12.00	NA	NA	NA	NA	NA	NA	NA	NA	NA	NA	NA	NA	NA	NA	NA	NA	NA	NA	NA	NA	NA	NA	NA	NA	NA	NA	NA	NA
SWE_AP6D	SWE_OSR_06_A	Apis mellifera	Sweden	Oilseed rape	55.53666	93.69	78.939	5.514	3.6	0.329	NA	10.00	NA	NA	NA	NA	NA	NA	NA	NA	NA	NA	NA	NA	NA	NA	NA	NA	NA	NA	NA	NA	NA	NA	NA	NA	NA	NA	NA	NA
SWE_AP6E	SWE_OSR_06_A	Apis mellifera	Sweden	Oilseed rape	55.53666	93.69	78.939	5.514	3.6	0.329	NA	8.16	NA	NA	NA	NA	NA	NA	NA	NA	NA	NA	NA	NA	NA	NA	NA	NA	NA	NA	NA	NA	NA	NA	NA	NA	NA	NA	NA	NA
SWE_AP7A	SWE_OSR_07_A	Apis mellifera	Sweden	Oilseed rape	55.96305	41.57	309.795	62.659	2.349	1.163	0.85	14.58	Picloram	Halauxifen-methyl	Clethodim	NA	NA	NA	NA	NA	NA	NA	NA	NA	NA	NA	NA	NA	NA	NA	NA	NA	NA	NA	NA	NA	NA	NA	NA	NA
SWE_AP7B	SWE_OSR_07_A	Apis mellifera	Sweden	Oilseed rape	55.96305	41.57	309.795	62.659	2.349	1.163	0.85	11.25	Picloram	Halauxifen-methyl	Clethodim	NA	NA	NA	NA	NA	NA	NA	NA	NA	NA	NA	NA	NA	NA	NA	NA	NA	NA	NA	NA	NA	NA	NA	NA	NA
SWE_AP7C	SWE_OSR_07_A	Apis mellifera	Sweden	Oilseed rape	55.96305	41.57	309.795	62.659	2.349	1.163	0.85	15.63	Picloram	Halauxifen-methyl	Clethodim	NA	NA	NA	NA	NA	NA	NA	NA	NA	NA	NA	NA	NA	NA	NA	NA	NA	NA	NA	NA	NA	NA	NA	NA	NA
SWE_AP7D	SWE_OSR_07_A	Apis mellifera	Sweden	Oilseed rape	55.96305	41.57	309.795	62.659	2.349	1.163	0.85	14.52	Picloram	Halauxifen-methyl	Clethodim	NA	NA	NA	NA	NA	NA	NA	NA	NA	NA	NA	NA	NA	NA	NA	NA	NA	NA	NA	NA	NA	NA	NA	NA	NA
SWE_AP7E	SWE_OSR_07_A	Apis mellifera	Sweden	Oilseed rape	55.96305	41.57	309.795	62.659	2.349	1.163	0.85	11.11	Picloram	Halauxifen-methyl	Clethodim	NA	NA	NA	NA	NA	NA	NA	NA	NA	NA	NA	NA	NA	NA	NA	NA	NA	NA	NA	NA	NA	NA	NA	NA	NA
SWE_AP8A	SWE_OSR_08_A	Apis mellifera	Sweden	Oilseed rape	55.76644	44.37	358.401	49.67	6.73	1.525	NA	13.04	NA	NA	NA	NA	NA	NA	NA	NA	NA	NA	NA	NA	NA	NA	NA	NA	NA	NA	NA	NA	NA	NA	NA	NA	NA	NA	NA	NA
SWE_AP8B	SWE_OSR_08_A	Apis mellifera	Sweden	Oilseed rape	55.76644	44.37	358.401	49.67	6.73	1.525	NA	14.00	NA	NA	NA	NA	NA	NA	NA	NA	NA	NA	NA	NA	NA	NA	NA	NA	NA	NA	NA	NA	NA	NA	NA	NA	NA	NA	NA	NA
SWE_AP8C	SWE_OSR_08_A	Apis mellifera	Sweden	Oilseed rape	55.76644	44.37	358.401	49.67	6.73	1.525	NA	14.29	NA	NA	NA	NA	NA	NA	NA	NA	NA	NA	NA	NA	NA	NA	NA	NA	NA	NA	NA	NA	NA	NA	NA	NA	NA	NA	NA	NA
SWE_AP8D	SWE_OSR_08_A	Apis mellifera	Sweden	Oilseed rape	55.76644	44.37	358.401	49.67	6.73	1.525	NA	12.66	NA	NA	NA	NA	NA	NA	NA	NA	NA	NA	NA	NA	NA	NA	NA	NA	NA	NA	NA	NA	NA	NA	NA	NA	NA	NA	NA	NA
SWE_AP8E	SWE_OSR_08_A	Apis mellifera	Sweden	Oilseed rape	55.76644	44.37	358.401	49.67	6.73	1.525	NA	13.73	NA	NA	NA	NA	NA	NA	NA	NA	NA	NA	NA	NA	NA	NA	NA	NA	NA	NA	NA	NA	NA	NA	NA	NA	NA	NA	NA	NA
SWE_AP9A	SWE_APP_09_A	Apis mellifera	Sweden	Apple	55.72062	81.54	215.758	17.701	9.065	0.948	NA	9.72	NA	NA	NA	NA	NA	NA	NA	NA	NA	NA	NA	NA	NA	NA	NA	NA	NA	NA	NA	NA	NA	NA	NA	NA	NA	NA	NA	NA
SWE_AP9B	SWE_APP_09_A	Apis mellifera	Sweden	Apple	55.72062	81.54	215.758	17.701	9.065	0.948	NA	12.35	NA	NA	NA	NA	NA	NA	NA	NA	NA	NA	NA	NA	NA	NA	NA	NA	NA	NA	NA	NA	NA	NA	NA	NA	NA	NA	NA	NA
SWE_AP9C	SWE_APP_09_A	Apis mellifera	Sweden	Apple	55.72062	81.54	215.758	17.701	9.065	0.948	NA	14.08	NA	NA	NA	NA	NA	NA	NA	NA	NA	NA	NA	NA	NA	NA	NA	NA	NA	NA	NA	NA	NA	NA	NA	NA	NA	NA	NA	NA
SWE_AP9D	SWE_APP_09_A	Apis mellifera	Sweden	Apple	55.72062	81.54	215.758	17.701	9.065	0.948	NA	10.53	NA	NA	NA	NA	NA	NA	NA	NA	NA	NA	NA	NA	NA	NA	NA	NA	NA	NA	NA	NA	NA	NA	NA	NA	NA	NA	NA	NA
SWE_AP9E	SWE_APP_09_A	Apis mellifera	Sweden	Apple	55.72062	81.54	215.758	17.701	9.065	0.948	NA	16.67	NA	NA	NA	NA	NA	NA	NA	NA	NA	NA	NA	NA	NA	NA	NA	NA	NA	NA	NA	NA	NA	NA	NA	NA	NA	NA	NA	NA
SWE_AP10A	SWE_APP_10_A	Apis mellifera	Sweden	Apple	55.74344	89.43	82.831	15.407	3.714	0.532	NA	9.26	NA	NA	NA	NA	NA	NA	NA	NA	NA	NA	NA	NA	NA	NA	NA	NA	NA	NA	NA	NA	NA	NA	NA	NA	NA	NA	NA	NA
SWE_AP10B	SWE_APP_10_A	Apis mellifera	Sweden	Apple	55.74344	89.43	82.831	15.407	3.714	0.532	NA	9.09	NA	NA	NA	NA	NA	NA	NA	NA	NA	NA	NA	NA	NA	NA	NA	NA	NA	NA	NA	NA	NA	NA	NA	NA	NA	NA	NA	NA
SWE_AP10C	SWE_APP_10_A	Apis mellifera	Sweden	Apple	55.74344	89.43	82.831	15.407	3.714	0.532	NA	12.50	NA	NA	NA	NA	NA	NA	NA	NA	NA	NA	NA	NA	NA	NA	NA	NA	NA	NA	NA	NA	NA	NA	NA	NA	NA	NA	NA	NA
SWE_AP10D	SWE_APP_10_A	Apis mellifera	Sweden	Apple	55.74344	89.43	82.831	15.407	3.714	0.532	NA	12.24	NA	NA	NA	NA	NA	NA	NA	NA	NA	NA	NA	NA	NA	NA	NA	NA	NA	NA	NA	NA	NA	NA	NA	NA	NA	NA	NA	NA
SWE_AP10E	SWE_APP_10_A	Apis mellifera	Sweden	Apple	55.74344	89.43	82.831	15.407	3.714	0.532	NA	16.07	NA	NA	NA	NA	NA	NA	NA	NA	NA	NA	NA	NA	NA	NA	NA	NA	NA	NA	NA	NA	NA	NA	NA	NA	NA	NA	NA	NA
SWE_AP11A	SWE_APP_11_A	Apis mellifera	Sweden	Apple	55.48838	37.56	325.852	59.383	4.091	1.484	NA	11.76	NA	NA	NA	NA	NA	NA	NA	NA	NA	NA	NA	NA	NA	NA	NA	NA	NA	NA	NA	NA	NA	NA	NA	NA	NA	NA	NA	NA
SWE_AP11B	SWE_APP_11_A	Apis mellifera	Sweden	Apple	55.48838	37.56	325.852	59.383	4.091	1.484	NA	10.64	NA	NA	NA	NA	NA	NA	NA	NA	NA	NA	NA	NA	NA	NA	NA	NA	NA	NA	NA	NA	NA	NA	NA	NA	NA	NA	NA	NA
SWE_AP11C	SWE_APP_11_A	Apis mellifera	Sweden	Apple	55.48838	37.56	325.852	59.383	4.091	1.484	NA	9.30	NA	NA	NA	NA	NA	NA	NA	NA	NA	NA	NA	NA	NA	NA	NA	NA	NA	NA	NA	NA	NA	NA	NA	NA	NA	NA	NA	NA
SWE_AP11D	SWE_APP_11_A	Apis mellifera	Sweden	Apple	55.48838	37.56	325.852	59.383	4.091	1.484	NA	10.20	NA	NA	NA	NA	NA	NA	NA	NA	NA	NA	NA	NA	NA	NA	NA	NA	NA	NA	NA	NA	NA	NA	NA	NA	NA	NA	NA	NA
SWE_AP11E	SWE_APP_11_A	Apis mellifera	Sweden	Apple	55.48838	37.56	325.852	59.383	4.091	1.484	NA	7.84	NA	NA	NA	NA	NA	NA	NA	NA	NA	NA	NA	NA	NA	NA	NA	NA	NA	NA	NA	NA	NA	NA	NA	NA	NA	NA	NA	NA
SWE_AP12A	SWE_APP_12_A	Apis mellifera	Sweden	Apple	55.65429	14.25	426.568	73.5	19.466	1.382	NA	10.00	NA	NA	NA	NA	NA	NA	NA	NA	NA	NA	NA	NA	NA	NA	NA	NA	NA	NA	NA	NA	NA	NA	NA	NA	NA	NA	NA	NA
SWE_AP12B	SWE_APP_12_A	Apis mellifera	Sweden	Apple	55.65429	14.25	426.568	73.5	19.466	1.382	NA	9.80	NA	NA	NA	NA	NA	NA	NA	NA	NA	NA	NA	NA	NA	NA	NA	NA	NA	NA	NA	NA	NA	NA	NA	NA	NA	NA	NA	NA
SWE_AP12C	SWE_APP_12_A	Apis mellifera	Sweden	Apple	55.65429	14.25	426.568	73.5	19.466	1.382	NA	13.76	NA	NA	NA	NA	NA	NA	NA	NA	NA	NA	NA	NA	NA	NA	NA	NA	NA	NA	NA	NA	NA	NA	NA	NA	NA	NA	NA	NA
SWE_AP12D	SWE_APP_12_A	Apis mellifera	Sweden	Apple	55.65429	14.25	426.568	73.5	19.466	1.382	NA	11.27	NA	NA	NA	NA	NA	NA	NA	NA	NA	NA	NA	NA	NA	NA	NA	NA	NA	NA	NA	NA	NA	NA	NA	NA	NA	NA	NA	NA
SWE_AP12E	SWE_APP_12_A	Apis mellifera	Sweden	Apple	55.65429	14.25	426.568	73.5	19.466	1.382	NA	10.45	NA	NA	NA	NA	NA	NA	NA	NA	NA	NA	NA	NA	NA	NA	NA	NA	NA	NA	NA	NA	NA	NA	NA	NA	NA	NA	NA	NA
SWE_AP13A	SWE_APP_13_A	Apis mellifera	Sweden	Apple	55.71520	45.27	434.866	66.645	13.723	1.563	NA	9.38	NA	NA	NA	NA	NA	NA	NA	NA	NA	NA	NA	NA	NA	NA	NA	NA	NA	NA	NA	NA	NA	NA	NA	NA	NA	NA	NA	NA
SWE_AP13B	SWE_APP_13_A	Apis mellifera	Sweden	Apple	55.71520	45.27	434.866	66.645	13.723	1.563	NA	12.73	NA	NA	NA	NA	NA	NA	NA	NA	NA	NA	NA	NA	NA	NA	NA	NA	NA	NA	NA	NA	NA	NA	NA	NA	NA	NA	NA	NA
SWE_AP13C	SWE_APP_13_A	Apis mellifera	Sweden	Apple	55.71520	45.27	434.866	66.645	13.723	1.563	NA	8.93	NA	NA	NA	NA	NA	NA	NA	NA	NA	NA	NA	NA	NA	NA	NA	NA	NA	NA	NA	NA	NA	NA	NA	NA	NA	NA	NA	NA
SWE_AP13D	SWE_APP_13_A	Apis mellifera	Sweden	Apple	55.71520	45.27	434.866	66.645	13.723	1.563	NA	15.09	NA	NA	NA	NA	NA	NA	NA	NA	NA	NA	NA	NA	NA	NA	NA	NA	NA	NA	NA	NA	NA	NA	NA	NA	NA	NA	NA	NA
SWE_AP13E	SWE_APP_13_A	Apis mellifera	Sweden	Apple	55.71520	45.27	434.866	66.645	13.723	1.563	NA	9.33	NA	NA	NA	NA	NA	NA	NA	NA	NA	NA	NA	NA	NA	NA	NA	NA	NA	NA	NA	NA	NA	NA	NA	NA	NA	NA	NA	NA
SWE_AP14A	SWE_APP_14_A	Apis mellifera	Sweden	Apple	55.54327	7.39	381.144	57.059	3.269	1.423	NA	9.09	NA	NA	NA	NA	NA	NA	NA	NA	NA	NA	NA	NA	NA	NA	NA	NA	NA	NA	NA	NA	NA	NA	NA	NA	NA	NA	NA	NA
SWE_AP14B	SWE_APP_14_A	Apis mellifera	Sweden	Apple	55.54327	7.39	381.144	57.059	3.269	1.423	NA	11.86	NA	NA	NA	NA	NA	NA	NA	NA	NA	NA	NA	NA	NA	NA	NA	NA	NA	NA	NA	NA	NA	NA	NA	NA	NA	NA	NA	NA
SWE_AP14C	SWE_APP_14_A	Apis mellifera	Sweden	Apple	55.54327	7.39	381.144	57.059	3.269	1.423	NA	12.07	NA	NA	NA	NA	NA	NA	NA	NA	NA	NA	NA	NA	NA	NA	NA	NA	NA	NA	NA	NA	NA	NA	NA	NA	NA	NA	NA	NA
SWE_AP14D	SWE_APP_14_A	Apis mellifera	Sweden	Apple	55.54327	7.39	381.144	57.059	3.269	1.423	NA	11.54	NA	NA	NA	NA	NA	NA	NA	NA	NA	NA	NA	NA	NA	NA	NA	NA	NA	NA	NA	NA	NA	NA	NA	NA	NA	NA	NA	NA
SWE_AP14E	SWE_APP_14_A	Apis mellifera	Sweden	Apple	55.54327	7.39	381.144	57.059	3.269	1.423	NA	9.30	NA	NA	NA	NA	NA	NA	NA	NA	NA	NA	NA	NA	NA	NA	NA	NA	NA	NA	NA	NA	NA	NA	NA	NA	NA	NA	NA	NA
SWE_AP15A	SWE_APP_15_A	Apis mellifera	Sweden	Apple	55.49595	75.87	161.897	16.896	2.083	0.995	NA	4.95	NA	NA	NA	NA	NA	NA	NA	NA	NA	NA	NA	NA	NA	NA	NA	NA	NA	NA	NA	NA	NA	NA	NA	NA	NA	NA	NA	NA
SWE_AP15B	SWE_APP_15_A	Apis mellifera	Sweden	Apple	55.49595	75.87	161.897	16.896	2.083	0.995	NA	6.45	NA	NA	NA	NA	NA	NA	NA	NA	NA	NA	NA	NA	NA	NA	NA	NA	NA	NA	NA	NA	NA	NA	NA	NA	NA	NA	NA	NA
SWE_AP15C	SWE_APP_15_A	Apis mellifera	Sweden	Apple	55.49595	75.87	161.897	16.896	2.083	0.995	NA	4.55	NA	NA	NA	NA	NA	NA	NA	NA	NA	NA	NA	NA	NA	NA	NA	NA	NA	NA	NA	NA	NA	NA	NA	NA	NA	NA	NA	NA
SWE_AP15D	SWE_APP_15_A	Apis mellifera	Sweden	Apple	55.49595	75.87	161.897	16.896	2.083	0.995	NA	7.09	NA	NA	NA	NA	NA	NA	NA	NA	NA	NA	NA	NA	NA	NA	NA	NA	NA	NA	NA	NA	NA	NA	NA	NA	NA	NA	NA	NA
SWE_AP15E	SWE_APP_15_A	Apis mellifera	Sweden	Apple	55.49595	75.87	161.897	16.896	2.083	0.995	NA	4.37	NA	NA	NA	NA	NA	NA	NA	NA	NA	NA	NA	NA	NA	NA	NA	NA	NA	NA	NA	NA	NA	NA	NA	NA	NA	NA	NA	NA
SWE_AP16A	SWE_APP_16_A	Apis mellifera	Sweden	Apple	55.68290	27.64	340.481	120.123	3.788	1.441	NA	11.11	NA	NA	NA	NA	NA	NA	NA	NA	NA	NA	NA	NA	NA	NA	NA	NA	NA	NA	NA	NA	NA	NA	NA	NA	NA	NA	NA	NA
SWE_AP16B	SWE_APP_16_A	Apis mellifera	Sweden	Apple	55.68290	27.64	340.481	120.123	3.788	1.441	NA	8.96	NA	NA	NA	NA	NA	NA	NA	NA	NA	NA	NA	NA	NA	NA	NA	NA	NA	NA	NA	NA	NA	NA	NA	NA	NA	NA	NA	NA
SWE_AP16C	SWE_APP_16_A	Apis mellifera	Sweden	Apple	55.68290	27.64	340.481	120.123	3.788	1.441	NA	11.11	NA	NA	NA	NA	NA	NA	NA	NA	NA	NA	NA	NA	NA	NA	NA	NA	NA	NA	NA	NA	NA	NA	NA	NA	NA	NA	NA	NA
SWE_AP16D	SWE_APP_16_A	Apis mellifera	Sweden	Apple	55.68290	27.64	340.481	120.123	3.788	1.441	NA	13.33	NA	NA	NA	NA	NA	NA	NA	NA	NA	NA	NA	NA	NA	NA	NA	NA	NA	NA	NA	NA	NA	NA	NA	NA	NA	NA	NA	NA
SWE_AP16E	SWE_APP_16_A	Apis mellifera	Sweden	Apple	55.68290	27.64	340.481	120.123	3.788	1.441	NA	11.48	NA	NA	NA	NA	NA	NA	NA	NA	NA	NA	NA	NA	NA	NA	NA	NA	NA	NA	NA	NA	NA	NA	NA	NA	NA	NA	NA	NA
SWE_B1A	SWE_OSR_01_B	Bombus terrestris	Sweden	Oilseed rape	55.55904	88.77	116.829	18.673	2.356	0.503	NA	10.25	NA	NA	NA	NA	NA	NA	NA	NA	NA	NA	NA	NA	NA	NA	NA	NA	NA	NA	NA	NA	NA	NA	NA	NA	NA	NA	NA	NA
SWE_B1B	SWE_OSR_01_B	Bombus terrestris	Sweden	Oilseed rape	55.55904	88.77	116.829	18.673	2.356	0.503	NA	7.65	NA	NA	NA	NA	NA	NA	NA	NA	NA	NA	NA	NA	NA	NA	NA	NA	NA	NA	NA	NA	NA	NA	NA	NA	NA	NA	NA	NA
SWE_B1C	SWE_OSR_01_B	Bombus terrestris	Sweden	Oilseed rape	55.55904	88.77	116.829	18.673	2.356	0.503	NA	9.20	NA	NA	NA	NA	NA	NA	NA	NA	NA	NA	NA	NA	NA	NA	NA	NA	NA	NA	NA	NA	NA	NA	NA	NA	NA	NA	NA	NA
SWE_B1D	SWE_OSR_01_B	Bombus terrestris	Sweden	Oilseed rape	55.55904	88.77	116.829	18.673	2.356	0.503	NA	7.67	NA	NA	NA	NA	NA	NA	NA	NA	NA	NA	NA	NA	NA	NA	NA	NA	NA	NA	NA	NA	NA	NA	NA	NA	NA	NA	NA	NA
SWE_B1E	SWE_OSR_01_B	Bombus terrestris	Sweden	Oilseed rape	55.55904	88.77	116.829	18.673	2.356	0.503	NA	10.67	NA	NA	NA	NA	NA	NA	NA	NA	NA	NA	NA	NA	NA	NA	NA	NA	NA	NA	NA	NA	NA	NA	NA	NA	NA	NA	NA	NA
SWE_B2A	SWE_OSR_02_B	Bombus terrestris	Sweden	Oilseed rape	55.45282	90.81	94.395	8.106	6.144	0.443	NA	9.93	NA	NA	NA	NA	NA	NA	NA	NA	NA	NA	NA	NA	NA	NA	NA	NA	NA	NA	NA	NA	NA	NA	NA	NA	NA	NA	NA	NA
SWE_B2B	SWE_OSR_02_B	Bombus terrestris	Sweden	Oilseed rape	55.45282	90.81	94.395	8.106	6.144	0.443	NA	9.55	NA	NA	NA	NA	NA	NA	NA	NA	NA	NA	NA	NA	NA	NA	NA	NA	NA	NA	NA	NA	NA	NA	NA	NA	NA	NA	NA	NA
SWE_B2C	SWE_OSR_02_B	Bombus terrestris	Sweden	Oilseed rape	55.45282	90.81	94.395	8.106	6.144	0.443	NA	12.81	NA	NA	NA	NA	NA	NA	NA	NA	NA	NA	NA	NA	NA	NA	NA	NA	NA	NA	NA	NA	NA	NA	NA	NA	NA	NA	NA	NA
SWE_B2D	SWE_OSR_02_B	Bombus terrestris	Sweden	Oilseed rape	55.45282	90.81	94.395	8.106	6.144	0.443	NA	10.24	NA	NA	NA	NA	NA	NA	NA	NA	NA	NA	NA	NA	NA	NA	NA	NA	NA	NA	NA	NA	NA	NA	NA	NA	NA	NA	NA	NA
SWE_B2E	SWE_OSR_02_B	Bombus terrestris	Sweden	Oilseed rape	55.45282	90.81	94.395	8.106	6.144	0.443	NA	11.37	NA	NA	NA	NA	NA	NA	NA	NA	NA	NA	NA	NA	NA	NA	NA	NA	NA	NA	NA	NA	NA	NA	NA	NA	NA	NA	NA	NA
SWE_B3A	SWE_OSR_03_B	Bombus terrestris	Sweden	Oilseed rape	56.00003	62.66	263.967	50.515	6.619	1.138	0.95	8.41	Picloram	Halauxifen-methyl	Alpha-cypermethrin	Clethodim	NA	NA	NA	NA	NA	NA	NA	NA	NA	NA	NA	NA	NA	NA	NA	NA	NA	NA	NA	NA	NA	NA	NA	NA
SWE_B3B	SWE_OSR_03_B	Bombus terrestris	Sweden	Oilseed rape	56.00003	62.66	263.967	50.515	6.619	1.138	0.95	11.86	Picloram	Halauxifen-methyl	Alpha-cypermethrin	Clethodim	NA	NA	NA	NA	NA	NA	NA	NA	NA	NA	NA	NA	NA	NA	NA	NA	NA	NA	NA	NA	NA	NA	NA	NA
SWE_B3C	SWE_OSR_03_B	Bombus terrestris	Sweden	Oilseed rape	56.00003	62.66	263.967	50.515	6.619	1.138	0.95	8.72	Picloram	Halauxifen-methyl	Alpha-cypermethrin	Clethodim	NA	NA	NA	NA	NA	NA	NA	NA	NA	NA	NA	NA	NA	NA	NA	NA	NA	NA	NA	NA	NA	NA	NA	NA
SWE_B3D	SWE_OSR_03_B	Bombus terrestris	Sweden	Oilseed rape	56.00003	62.66	263.967	50.515	6.619	1.138	0.95	9.87	Picloram	Halauxifen-methyl	Alpha-cypermethrin	Clethodim	NA	NA	NA	NA	NA	NA	NA	NA	NA	NA	NA	NA	NA	NA	NA	NA	NA	NA	NA	NA	NA	NA	NA	NA
SWE_B3E	SWE_OSR_03_B	Bombus terrestris	Sweden	Oilseed rape	56.00003	62.66	263.967	50.515	6.619	1.138	0.95	7.75	Picloram	Halauxifen-methyl	Alpha-cypermethrin	Clethodim	NA	NA	NA	NA	NA	NA	NA	NA	NA	NA	NA	NA	NA	NA	NA	NA	NA	NA	NA	NA	NA	NA	NA	NA
SWE_B4A	SWE_OSR_04_B	Bombus terrestris	Sweden	Oilseed rape	55.56433	93.83	48.443	7.903	2.619	0.318	0.75	8.58	NA	NA	NA	NA	NA	NA	NA	NA	NA	NA	NA	NA	NA	NA	NA	NA	NA	NA	NA	NA	NA	NA	NA	NA	NA	NA	NA	NA
SWE_B4B	SWE_OSR_04_B	Bombus terrestris	Sweden	Oilseed rape	55.56433	93.83	48.443	7.903	2.619	0.318	0.75	10.85	NA	NA	NA	NA	NA	NA	NA	NA	NA	NA	NA	NA	NA	NA	NA	NA	NA	NA	NA	NA	NA	NA	NA	NA	NA	NA	NA	NA
SWE_B4C	SWE_OSR_04_B	Bombus terrestris	Sweden	Oilseed rape	55.56433	93.83	48.443	7.903	2.619	0.318	0.75	10.92	NA	NA	NA	NA	NA	NA	NA	NA	NA	NA	NA	NA	NA	NA	NA	NA	NA	NA	NA	NA	NA	NA	NA	NA	NA	NA	NA	NA
SWE_B4D	SWE_OSR_04_B	Bombus terrestris	Sweden	Oilseed rape	55.56433	93.83	48.443	7.903	2.619	0.318	0.75	10.31	NA	NA	NA	NA	NA	NA	NA	NA	NA	NA	NA	NA	NA	NA	NA	NA	NA	NA	NA	NA	NA	NA	NA	NA	NA	NA	NA	NA
SWE_B4E	SWE_OSR_04_B	Bombus terrestris	Sweden	Oilseed rape	55.56433	93.83	48.443	7.903	2.619	0.318	0.75	9.85	NA	NA	NA	NA	NA	NA	NA	NA	NA	NA	NA	NA	NA	NA	NA	NA	NA	NA	NA	NA	NA	NA	NA	NA	NA	NA	NA	NA
SWE_B5A	SWE_OSR_05_B	Bombus terrestris	Sweden	Oilseed rape	55.82475	83.67	139.089	18.19	9.077	0.678	3.15	16.00	Indoxacarb	Picloram	Halauxifen-methyl	Boscalid	NA	NA	NA	NA	NA	NA	NA	NA	NA	NA	NA	NA	NA	NA	NA	NA	NA	NA	NA	NA	NA	NA	NA	NA
SWE_B5B	SWE_OSR_05_B	Bombus terrestris	Sweden	Oilseed rape	55.82475	83.67	139.089	18.19	9.077	0.678	3.15	12.50	Indoxacarb	Picloram	Halauxifen-methyl	Boscalid	NA	NA	NA	NA	NA	NA	NA	NA	NA	NA	NA	NA	NA	NA	NA	NA	NA	NA	NA	NA	NA	NA	NA	NA
SWE_B5C	SWE_OSR_05_B	Bombus terrestris	Sweden	Oilseed rape	55.82475	83.67	139.089	18.19	9.077	0.678	3.15	7.27	Indoxacarb	Picloram	Halauxifen-methyl	Boscalid	NA	NA	NA	NA	NA	NA	NA	NA	NA	NA	NA	NA	NA	NA	NA	NA	NA	NA	NA	NA	NA	NA	NA	NA
SWE_B5D	SWE_OSR_05_B	Bombus terrestris	Sweden	Oilseed rape	55.82475	83.67	139.089	18.19	9.077	0.678	3.15	9.33	Indoxacarb	Picloram	Halauxifen-methyl	Boscalid	NA	NA	NA	NA	NA	NA	NA	NA	NA	NA	NA	NA	NA	NA	NA	NA	NA	NA	NA	NA	NA	NA	NA	NA
SWE_B5E	SWE_OSR_05_B	Bombus terrestris	Sweden	Oilseed rape	55.82475	83.67	139.089	18.19	9.077	0.678	3.15	8.60	Indoxacarb	Picloram	Halauxifen-methyl	Boscalid	NA	NA	NA	NA	NA	NA	NA	NA	NA	NA	NA	NA	NA	NA	NA	NA	NA	NA	NA	NA	NA	NA	NA	NA
SWE_B6A	SWE_OSR_06_B	Bombus terrestris	Sweden	Oilseed rape	55.53666	93.69	78.939	5.514	3.6	0.329	NA	12.63	NA	NA	NA	NA	NA	NA	NA	NA	NA	NA	NA	NA	NA	NA	NA	NA	NA	NA	NA	NA	NA	NA	NA	NA	NA	NA	NA	NA
SWE_B6B	SWE_OSR_06_B	Bombus terrestris	Sweden	Oilseed rape	55.53666	93.69	78.939	5.514	3.6	0.329	NA	5.40	NA	NA	NA	NA	NA	NA	NA	NA	NA	NA	NA	NA	NA	NA	NA	NA	NA	NA	NA	NA	NA	NA	NA	NA	NA	NA	NA	NA
SWE_B6C	SWE_OSR_06_B	Bombus terrestris	Sweden	Oilseed rape	55.53666	93.69	78.939	5.514	3.6	0.329	NA	5.08	NA	NA	NA	NA	NA	NA	NA	NA	NA	NA	NA	NA	NA	NA	NA	NA	NA	NA	NA	NA	NA	NA	NA	NA	NA	NA	NA	NA
SWE_B6D	SWE_OSR_06_B	Bombus terrestris	Sweden	Oilseed rape	55.53666	93.69	78.939	5.514	3.6	0.329	NA	8.17	NA	NA	NA	NA	NA	NA	NA	NA	NA	NA	NA	NA	NA	NA	NA	NA	NA	NA	NA	NA	NA	NA	NA	NA	NA	NA	NA	NA
SWE_B6E	SWE_OSR_06_B	Bombus terrestris	Sweden	Oilseed rape	55.53666	93.69	78.939	5.514	3.6	0.329	NA	6.76	NA	NA	NA	NA	NA	NA	NA	NA	NA	NA	NA	NA	NA	NA	NA	NA	NA	NA	NA	NA	NA	NA	NA	NA	NA	NA	NA	NA
SWE_B7A	SWE_OSR_07_B	Bombus terrestris	Sweden	Oilseed rape	55.96305	41.57	309.795	62.659	2.349	1.163	0.85	7.32	Picloram	Halauxifen-methyl	Clethodim	NA	NA	NA	NA	NA	NA	NA	NA	NA	NA	NA	NA	NA	NA	NA	NA	NA	NA	NA	NA	NA	NA	NA	NA	NA
SWE_B7B	SWE_OSR_07_B	Bombus terrestris	Sweden	Oilseed rape	55.96305	41.57	309.795	62.659	2.349	1.163	0.85	6.54	Picloram	Halauxifen-methyl	Clethodim	NA	NA	NA	NA	NA	NA	NA	NA	NA	NA	NA	NA	NA	NA	NA	NA	NA	NA	NA	NA	NA	NA	NA	NA	NA
SWE_B7C	SWE_OSR_07_B	Bombus terrestris	Sweden	Oilseed rape	55.96305	41.57	309.795	62.659	2.349	1.163	0.85	8.16	Picloram	Halauxifen-methyl	Clethodim	NA	NA	NA	NA	NA	NA	NA	NA	NA	NA	NA	NA	NA	NA	NA	NA	NA	NA	NA	NA	NA	NA	NA	NA	NA
SWE_B7D	SWE_OSR_07_B	Bombus terrestris	Sweden	Oilseed rape	55.96305	41.57	309.795	62.659	2.349	1.163	0.85	10.42	Picloram	Halauxifen-methyl	Clethodim	NA	NA	NA	NA	NA	NA	NA	NA	NA	NA	NA	NA	NA	NA	NA	NA	NA	NA	NA	NA	NA	NA	NA	NA	NA
SWE_B7E	SWE_OSR_07_B	Bombus terrestris	Sweden	Oilseed rape	55.96305	41.57	309.795	62.659	2.349	1.163	0.85	6.82	Picloram	Halauxifen-methyl	Clethodim	NA	NA	NA	NA	NA	NA	NA	NA	NA	NA	NA	NA	NA	NA	NA	NA	NA	NA	NA	NA	NA	NA	NA	NA	NA
SWE_B8A	SWE_OSR_08_B	Bombus terrestris	Sweden	Oilseed rape	55.76644	44.37	358.401	49.67	6.73	1.525	NA	8.74	NA	NA	NA	NA	NA	NA	NA	NA	NA	NA	NA	NA	NA	NA	NA	NA	NA	NA	NA	NA	NA	NA	NA	NA	NA	NA	NA	NA
SWE_B8B	SWE_OSR_08_B	Bombus terrestris	Sweden	Oilseed rape	55.76644	44.37	358.401	49.67	6.73	1.525	NA	11.92	NA	NA	NA	NA	NA	NA	NA	NA	NA	NA	NA	NA	NA	NA	NA	NA	NA	NA	NA	NA	NA	NA	NA	NA	NA	NA	NA	NA
SWE_B8C	SWE_OSR_08_B	Bombus terrestris	Sweden	Oilseed rape	55.76644	44.37	358.401	49.67	6.73	1.525	NA	12.37	NA	NA	NA	NA	NA	NA	NA	NA	NA	NA	NA	NA	NA	NA	NA	NA	NA	NA	NA	NA	NA	NA	NA	NA	NA	NA	NA	NA
SWE_B8D	SWE_OSR_08_B	Bombus terrestris	Sweden	Oilseed rape	55.76644	44.37	358.401	49.67	6.73	1.525	NA	6.50	NA	NA	NA	NA	NA	NA	NA	NA	NA	NA	NA	NA	NA	NA	NA	NA	NA	NA	NA	NA	NA	NA	NA	NA	NA	NA	NA	NA
SWE_B8E	SWE_OSR_08_B	Bombus terrestris	Sweden	Oilseed rape	55.76644	44.37	358.401	49.67	6.73	1.525	NA	9.24	NA	NA	NA	NA	NA	NA	NA	NA	NA	NA	NA	NA	NA	NA	NA	NA	NA	NA	NA	NA	NA	NA	NA	NA	NA	NA	NA	NA
SWE_B9A	SWE_APP_09_B	Bombus terrestris	Sweden	Apple	55.72062	81.54	215.758	17.701	9.065	0.948	NA	11.59	NA	NA	NA	NA	NA	NA	NA	NA	NA	NA	NA	NA	NA	NA	NA	NA	NA	NA	NA	NA	NA	NA	NA	NA	NA	NA	NA	NA
SWE_B9B	SWE_APP_09_B	Bombus terrestris	Sweden	Apple	55.72062	81.54	215.758	17.701	9.065	0.948	NA	7.67	NA	NA	NA	NA	NA	NA	NA	NA	NA	NA	NA	NA	NA	NA	NA	NA	NA	NA	NA	NA	NA	NA	NA	NA	NA	NA	NA	NA
SWE_B9C	SWE_APP_09_B	Bombus terrestris	Sweden	Apple	55.72062	81.54	215.758	17.701	9.065	0.948	NA	9.87	NA	NA	NA	NA	NA	NA	NA	NA	NA	NA	NA	NA	NA	NA	NA	NA	NA	NA	NA	NA	NA	NA	NA	NA	NA	NA	NA	NA
SWE_B9D	SWE_APP_09_B	Bombus terrestris	Sweden	Apple	55.72062	81.54	215.758	17.701	9.065	0.948	NA	8.18	NA	NA	NA	NA	NA	NA	NA	NA	NA	NA	NA	NA	NA	NA	NA	NA	NA	NA	NA	NA	NA	NA	NA	NA	NA	NA	NA	NA
SWE_B9E	SWE_APP_09_B	Bombus terrestris	Sweden	Apple	55.72062	81.54	215.758	17.701	9.065	0.948	NA	10.42	NA	NA	NA	NA	NA	NA	NA	NA	NA	NA	NA	NA	NA	NA	NA	NA	NA	NA	NA	NA	NA	NA	NA	NA	NA	NA	NA	NA
SWE_B10A	SWE_APP_10_B	Bombus terrestris	Sweden	Apple	55.74344	89.43	82.831	15.407	3.714	0.532	NA	7.30	NA	NA	NA	NA	NA	NA	NA	NA	NA	NA	NA	NA	NA	NA	NA	NA	NA	NA	NA	NA	NA	NA	NA	NA	NA	NA	NA	NA
SWE_B10B	SWE_APP_10_B	Bombus terrestris	Sweden	Apple	55.74344	89.43	82.831	15.407	3.714	0.532	NA	6.39	NA	NA	NA	NA	NA	NA	NA	NA	NA	NA	NA	NA	NA	NA	NA	NA	NA	NA	NA	NA	NA	NA	NA	NA	NA	NA	NA	NA
SWE_B10C	SWE_APP_10_B	Bombus terrestris	Sweden	Apple	55.74344	89.43	82.831	15.407	3.714	0.532	NA	8.26	NA	NA	NA	NA	NA	NA	NA	NA	NA	NA	NA	NA	NA	NA	NA	NA	NA	NA	NA	NA	NA	NA	NA	NA	NA	NA	NA	NA
SWE_B10D	SWE_APP_10_B	Bombus terrestris	Sweden	Apple	55.74344	89.43	82.831	15.407	3.714	0.532	NA	10.98	NA	NA	NA	NA	NA	NA	NA	NA	NA	NA	NA	NA	NA	NA	NA	NA	NA	NA	NA	NA	NA	NA	NA	NA	NA	NA	NA	NA
SWE_B10E	SWE_APP_10_B	Bombus terrestris	Sweden	Apple	55.74344	89.43	82.831	15.407	3.714	0.532	NA	7.56	NA	NA	NA	NA	NA	NA	NA	NA	NA	NA	NA	NA	NA	NA	NA	NA	NA	NA	NA	NA	NA	NA	NA	NA	NA	NA	NA	NA
SWE_B11A	SWE_APP_11_B	Bombus terrestris	Sweden	Apple	55.48838	37.56	325.852	59.383	4.091	1.484	NA	6.78	NA	NA	NA	NA	NA	NA	NA	NA	NA	NA	NA	NA	NA	NA	NA	NA	NA	NA	NA	NA	NA	NA	NA	NA	NA	NA	NA	NA
SWE_B11B	SWE_APP_11_B	Bombus terrestris	Sweden	Apple	55.48838	37.56	325.852	59.383	4.091	1.484	NA	6.85	NA	NA	NA	NA	NA	NA	NA	NA	NA	NA	NA	NA	NA	NA	NA	NA	NA	NA	NA	NA	NA	NA	NA	NA	NA	NA	NA	NA
SWE_B11C	SWE_APP_11_B	Bombus terrestris	Sweden	Apple	55.48838	37.56	325.852	59.383	4.091	1.484	NA	7.82	NA	NA	NA	NA	NA	NA	NA	NA	NA	NA	NA	NA	NA	NA	NA	NA	NA	NA	NA	NA	NA	NA	NA	NA	NA	NA	NA	NA
SWE_B11D	SWE_APP_11_B	Bombus terrestris	Sweden	Apple	55.48838	37.56	325.852	59.383	4.091	1.484	NA	7.88	NA	NA	NA	NA	NA	NA	NA	NA	NA	NA	NA	NA	NA	NA	NA	NA	NA	NA	NA	NA	NA	NA	NA	NA	NA	NA	NA	NA
SWE_B11E	SWE_APP_11_B	Bombus terrestris	Sweden	Apple	55.48838	37.56	325.852	59.383	4.091	1.484	NA	7.35	NA	NA	NA	NA	NA	NA	NA	NA	NA	NA	NA	NA	NA	NA	NA	NA	NA	NA	NA	NA	NA	NA	NA	NA	NA	NA	NA	NA
SWE_B12A	SWE_APP_12_B	Bombus terrestris	Sweden	Apple	55.65429	14.25	426.568	73.5	19.466	1.382	NA	7.71	NA	NA	NA	NA	NA	NA	NA	NA	NA	NA	NA	NA	NA	NA	NA	NA	NA	NA	NA	NA	NA	NA	NA	NA	NA	NA	NA	NA
SWE_B12B	SWE_APP_12_B	Bombus terrestris	Sweden	Apple	55.65429	14.25	426.568	73.5	19.466	1.382	NA	9.88	NA	NA	NA	NA	NA	NA	NA	NA	NA	NA	NA	NA	NA	NA	NA	NA	NA	NA	NA	NA	NA	NA	NA	NA	NA	NA	NA	NA
SWE_B12C	SWE_APP_12_B	Bombus terrestris	Sweden	Apple	55.65429	14.25	426.568	73.5	19.466	1.382	NA	7.43	NA	NA	NA	NA	NA	NA	NA	NA	NA	NA	NA	NA	NA	NA	NA	NA	NA	NA	NA	NA	NA	NA	NA	NA	NA	NA	NA	NA
SWE_B12D	SWE_APP_12_B	Bombus terrestris	Sweden	Apple	55.65429	14.25	426.568	73.5	19.466	1.382	NA	7.54	NA	NA	NA	NA	NA	NA	NA	NA	NA	NA	NA	NA	NA	NA	NA	NA	NA	NA	NA	NA	NA	NA	NA	NA	NA	NA	NA	NA
SWE_B12E	SWE_APP_12_B	Bombus terrestris	Sweden	Apple	55.65429	14.25	426.568	73.5	19.466	1.382	NA	5.05	NA	NA	NA	NA	NA	NA	NA	NA	NA	NA	NA	NA	NA	NA	NA	NA	NA	NA	NA	NA	NA	NA	NA	NA	NA	NA	NA	NA
SWE_B13A	SWE_APP_13_B	Bombus terrestris	Sweden	Apple	55.71520	45.27	434.866	66.645	13.723	1.563	NA	9.25	NA	NA	NA	NA	NA	NA	NA	NA	NA	NA	NA	NA	NA	NA	NA	NA	NA	NA	NA	NA	NA	NA	NA	NA	NA	NA	NA	NA
SWE_B13B	SWE_APP_13_B	Bombus terrestris	Sweden	Apple	55.71520	45.27	434.866	66.645	13.723	1.563	NA	8.64	NA	NA	NA	NA	NA	NA	NA	NA	NA	NA	NA	NA	NA	NA	NA	NA	NA	NA	NA	NA	NA	NA	NA	NA	NA	NA	NA	NA
SWE_B13C	SWE_APP_13_B	Bombus terrestris	Sweden	Apple	55.71520	45.27	434.866	66.645	13.723	1.563	NA	7.59	NA	NA	NA	NA	NA	NA	NA	NA	NA	NA	NA	NA	NA	NA	NA	NA	NA	NA	NA	NA	NA	NA	NA	NA	NA	NA	NA	NA
SWE_B13D	SWE_APP_13_B	Bombus terrestris	Sweden	Apple	55.71520	45.27	434.866	66.645	13.723	1.563	NA	9.66	NA	NA	NA	NA	NA	NA	NA	NA	NA	NA	NA	NA	NA	NA	NA	NA	NA	NA	NA	NA	NA	NA	NA	NA	NA	NA	NA	NA
SWE_B13E	SWE_APP_13_B	Bombus terrestris	Sweden	Apple	55.71520	45.27	434.866	66.645	13.723	1.563	NA	11.21	NA	NA	NA	NA	NA	NA	NA	NA	NA	NA	NA	NA	NA	NA	NA	NA	NA	NA	NA	NA	NA	NA	NA	NA	NA	NA	NA	NA
SWE_B14A	SWE_APP_14_B	Bombus terrestris	Sweden	Apple	55.54327	7.39	381.144	57.059	3.269	1.423	NA	8.89	NA	NA	NA	NA	NA	NA	NA	NA	NA	NA	NA	NA	NA	NA	NA	NA	NA	NA	NA	NA	NA	NA	NA	NA	NA	NA	NA	NA
SWE_B14B	SWE_APP_14_B	Bombus terrestris	Sweden	Apple	55.54327	7.39	381.144	57.059	3.269	1.423	NA	9.13	NA	NA	NA	NA	NA	NA	NA	NA	NA	NA	NA	NA	NA	NA	NA	NA	NA	NA	NA	NA	NA	NA	NA	NA	NA	NA	NA	NA
SWE_B14C	SWE_APP_14_B	Bombus terrestris	Sweden	Apple	55.54327	7.39	381.144	57.059	3.269	1.423	NA	13.37	NA	NA	NA	NA	NA	NA	NA	NA	NA	NA	NA	NA	NA	NA	NA	NA	NA	NA	NA	NA	NA	NA	NA	NA	NA	NA	NA	NA
SWE_B14D	SWE_APP_14_B	Bombus terrestris	Sweden	Apple	55.54327	7.39	381.144	57.059	3.269	1.423	NA	8.67	NA	NA	NA	NA	NA	NA	NA	NA	NA	NA	NA	NA	NA	NA	NA	NA	NA	NA	NA	NA	NA	NA	NA	NA	NA	NA	NA	NA
SWE_B14E	SWE_APP_14_B	Bombus terrestris	Sweden	Apple	55.54327	7.39	381.144	57.059	3.269	1.423	NA	8.67	NA	NA	NA	NA	NA	NA	NA	NA	NA	NA	NA	NA	NA	NA	NA	NA	NA	NA	NA	NA	NA	NA	NA	NA	NA	NA	NA	NA
SWE_B15A	SWE_APP_15_B	Bombus terrestris	Sweden	Apple	55.49595	75.87	161.897	16.896	2.083	0.995	NA	8.59	NA	NA	NA	NA	NA	NA	NA	NA	NA	NA	NA	NA	NA	NA	NA	NA	NA	NA	NA	NA	NA	NA	NA	NA	NA	NA	NA	NA
SWE_B15B	SWE_APP_15_B	Bombus terrestris	Sweden	Apple	55.49595	75.87	161.897	16.896	2.083	0.995	NA	14.02	NA	NA	NA	NA	NA	NA	NA	NA	NA	NA	NA	NA	NA	NA	NA	NA	NA	NA	NA	NA	NA	NA	NA	NA	NA	NA	NA	NA
SWE_B15C	SWE_APP_15_B	Bombus terrestris	Sweden	Apple	55.49595	75.87	161.897	16.896	2.083	0.995	NA	9.63	NA	NA	NA	NA	NA	NA	NA	NA	NA	NA	NA	NA	NA	NA	NA	NA	NA	NA	NA	NA	NA	NA	NA	NA	NA	NA	NA	NA
SWE_B15D	SWE_APP_15_B	Bombus terrestris	Sweden	Apple	55.49595	75.87	161.897	16.896	2.083	0.995	NA	7.84	NA	NA	NA	NA	NA	NA	NA	NA	NA	NA	NA	NA	NA	NA	NA	NA	NA	NA	NA	NA	NA	NA	NA	NA	NA	NA	NA	NA
SWE_B15E	SWE_APP_15_B	Bombus terrestris	Sweden	Apple	55.49595	75.87	161.897	16.896	2.083	0.995	NA	7.21	NA	NA	NA	NA	NA	NA	NA	NA	NA	NA	NA	NA	NA	NA	NA	NA	NA	NA	NA	NA	NA	NA	NA	NA	NA	NA	NA	NA
SWE_B16A	SWE_APP_16_B	Bombus terrestris	Sweden	Apple	55.68290	27.64	340.481	120.123	3.788	1.441	NA	9.34	NA	NA	NA	NA	NA	NA	NA	NA	NA	NA	NA	NA	NA	NA	NA	NA	NA	NA	NA	NA	NA	NA	NA	NA	NA	NA	NA	NA
SWE_B16B	SWE_APP_16_B	Bombus terrestris	Sweden	Apple	55.68290	27.64	340.481	120.123	3.788	1.441	NA	7.83	NA	NA	NA	NA	NA	NA	NA	NA	NA	NA	NA	NA	NA	NA	NA	NA	NA	NA	NA	NA	NA	NA	NA	NA	NA	NA	NA	NA
SWE_B16C	SWE_APP_16_B	Bombus terrestris	Sweden	Apple	55.68290	27.64	340.481	120.123	3.788	1.441	NA	7.91	NA	NA	NA	NA	NA	NA	NA	NA	NA	NA	NA	NA	NA	NA	NA	NA	NA	NA	NA	NA	NA	NA	NA	NA	NA	NA	NA	NA
SWE_B16D	SWE_APP_16_B	Bombus terrestris	Sweden	Apple	55.68290	27.64	340.481	120.123	3.788	1.441	NA	8.44	NA	NA	NA	NA	NA	NA	NA	NA	NA	NA	NA	NA	NA	NA	NA	NA	NA	NA	NA	NA	NA	NA	NA	NA	NA	NA	NA	NA
SWE_B16E	SWE_APP_16_B	Bombus terrestris	Sweden	Apple	55.68290	27.64	340.481	120.123	3.788	1.441	NA	11.51	NA	NA	NA	NA	NA	NA	NA	NA	NA	NA	NA	NA	NA	NA	NA	NA	NA	NA	NA	NA	NA	NA	NA	NA	NA	NA	NA	NA
CHE_AP1A	CHE_OSR_01_A	Apis mellifera	Switzerland	Oilseed rape	47.43632	44.82	284.463	61.506	3.521	1.492	3	10.62	Napropamide	NA	NA	NA	NA	NA	NA	NA	NA	NA	NA	NA	NA	NA	NA	NA	NA	NA	NA	NA	NA	NA	NA	NA	NA	NA	NA	NA
CHE_AP1B	CHE_OSR_01_A	Apis mellifera	Switzerland	Oilseed rape	47.43632	44.82	284.463	61.506	3.521	1.492	3	7.53	Napropamide	NA	NA	NA	NA	NA	NA	NA	NA	NA	NA	NA	NA	NA	NA	NA	NA	NA	NA	NA	NA	NA	NA	NA	NA	NA	NA	NA
CHE_AP1C	CHE_OSR_01_A	Apis mellifera	Switzerland	Oilseed rape	47.43632	44.82	284.463	61.506	3.521	1.492	3	17.35	Napropamide	NA	NA	NA	NA	NA	NA	NA	NA	NA	NA	NA	NA	NA	NA	NA	NA	NA	NA	NA	NA	NA	NA	NA	NA	NA	NA	NA
CHE_AP1D	CHE_OSR_01_A	Apis mellifera	Switzerland	Oilseed rape	47.43632	44.82	284.463	61.506	3.521	1.492	3	3.52	Napropamide	NA	NA	NA	NA	NA	NA	NA	NA	NA	NA	NA	NA	NA	NA	NA	NA	NA	NA	NA	NA	NA	NA	NA	NA	NA	NA	NA
CHE_AP1E	CHE_OSR_01_A	Apis mellifera	Switzerland	Oilseed rape	47.43632	44.82	284.463	61.506	3.521	1.492	3	2.87	Napropamide	NA	NA	NA	NA	NA	NA	NA	NA	NA	NA	NA	NA	NA	NA	NA	NA	NA	NA	NA	NA	NA	NA	NA	NA	NA	NA	NA
CHE_AP2A	CHE_OSR_02_A	Apis mellifera	Switzerland	Oilseed rape	47.45213	48.08	291.889	80.253	22.263	1.424	6.275	7.25	Napropamide	Lambda-cyhalothrin	Fluopyram	Prothioconazole	Tebuconazole	NA	NA	NA	NA	NA	NA	NA	NA	NA	NA	NA	NA	NA	NA	NA	NA	NA	NA	NA	NA	NA	NA	NA
CHE_AP2B	CHE_OSR_02_A	Apis mellifera	Switzerland	Oilseed rape	47.45213	48.08	291.889	80.253	22.263	1.424	6.275	4.87	Napropamide	Lambda-cyhalothrin	Fluopyram	Prothioconazole	Tebuconazole	NA	NA	NA	NA	NA	NA	NA	NA	NA	NA	NA	NA	NA	NA	NA	NA	NA	NA	NA	NA	NA	NA	NA
CHE_AP2C	CHE_OSR_02_A	Apis mellifera	Switzerland	Oilseed rape	47.45213	48.08	291.889	80.253	22.263	1.424	6.275	3.52	Napropamide	Lambda-cyhalothrin	Fluopyram	Prothioconazole	Tebuconazole	NA	NA	NA	NA	NA	NA	NA	NA	NA	NA	NA	NA	NA	NA	NA	NA	NA	NA	NA	NA	NA	NA	NA
CHE_AP2D	CHE_OSR_02_A	Apis mellifera	Switzerland	Oilseed rape	47.45213	48.08	291.889	80.253	22.263	1.424	6.275	1.50	Napropamide	Lambda-cyhalothrin	Fluopyram	Prothioconazole	Tebuconazole	NA	NA	NA	NA	NA	NA	NA	NA	NA	NA	NA	NA	NA	NA	NA	NA	NA	NA	NA	NA	NA	NA	NA
CHE_AP2E	CHE_OSR_02_A	Apis mellifera	Switzerland	Oilseed rape	47.45213	48.08	291.889	80.253	22.263	1.424	6.275	12.54	Napropamide	Lambda-cyhalothrin	Fluopyram	Prothioconazole	Tebuconazole	NA	NA	NA	NA	NA	NA	NA	NA	NA	NA	NA	NA	NA	NA	NA	NA	NA	NA	NA	NA	NA	NA	NA
CHE_A3A	CHE_OSR_03_A	Apis mellifera	Switzerland	Oilseed rape	47.49278	37.90	291.078	107.52	8.687	1.448	1.05	3.52	Tebuconazole	NA	NA	NA	NA	NA	NA	NA	NA	NA	NA	NA	NA	NA	NA	NA	NA	NA	NA	NA	NA	NA	NA	NA	NA	NA	NA	NA
CHE_AP3B	CHE_OSR_03_A	Apis mellifera	Switzerland	Oilseed rape	47.49278	37.90	291.078	107.52	8.687	1.448	1.05	4.95	Tebuconazole	NA	NA	NA	NA	NA	NA	NA	NA	NA	NA	NA	NA	NA	NA	NA	NA	NA	NA	NA	NA	NA	NA	NA	NA	NA	NA	NA
CHE_AP3C	CHE_OSR_03_A	Apis mellifera	Switzerland	Oilseed rape	47.49278	37.90	291.078	107.52	8.687	1.448	1.05	3.74	Tebuconazole	NA	NA	NA	NA	NA	NA	NA	NA	NA	NA	NA	NA	NA	NA	NA	NA	NA	NA	NA	NA	NA	NA	NA	NA	NA	NA	NA
CHE_AP3D	CHE_OSR_03_A	Apis mellifera	Switzerland	Oilseed rape	47.49278	37.90	291.078	107.52	8.687	1.448	1.05	18.54	Tebuconazole	NA	NA	NA	NA	NA	NA	NA	NA	NA	NA	NA	NA	NA	NA	NA	NA	NA	NA	NA	NA	NA	NA	NA	NA	NA	NA	NA
CHE_AP3E	CHE_OSR_03_A	Apis mellifera	Switzerland	Oilseed rape	47.49278	37.90	291.078	107.52	8.687	1.448	1.05	11.79	Tebuconazole	NA	NA	NA	NA	NA	NA	NA	NA	NA	NA	NA	NA	NA	NA	NA	NA	NA	NA	NA	NA	NA	NA	NA	NA	NA	NA	NA
CHE_AP4A	CHE_OSR_04_A	Apis mellifera	Switzerland	Oilseed rape	47.54499	61.62	172.287	59.474	6.891	1.14	6.35	9.17	Napropamide	Acetamiprid	Fluopyram	Prothioconazole	Pethoxamide	Bifenthrin	NA	NA	NA	NA	NA	NA	NA	NA	NA	NA	NA	NA	NA	NA	NA	NA	NA	NA	NA	NA	NA	NA
CHE_AP4B	CHE_OSR_04_A	Apis mellifera	Switzerland	Oilseed rape	47.54499	61.62	172.287	59.474	6.891	1.14	6.35	4.16	Napropamide	Acetamiprid	Fluopyram	Prothioconazole	Pethoxamide	Bifenthrin	NA	NA	NA	NA	NA	NA	NA	NA	NA	NA	NA	NA	NA	NA	NA	NA	NA	NA	NA	NA	NA	NA
CHE_AP4C	CHE_OSR_04_A	Apis mellifera	Switzerland	Oilseed rape	47.54499	61.62	172.287	59.474	6.891	1.14	6.35	8.52	Napropamide	Acetamiprid	Fluopyram	Prothioconazole	Pethoxamide	Bifenthrin	NA	NA	NA	NA	NA	NA	NA	NA	NA	NA	NA	NA	NA	NA	NA	NA	NA	NA	NA	NA	NA	NA
CHE_AP4D	CHE_OSR_04_A	Apis mellifera	Switzerland	Oilseed rape	47.54499	61.62	172.287	59.474	6.891	1.14	6.35	7.04	Napropamide	Acetamiprid	Fluopyram	Prothioconazole	Pethoxamide	Bifenthrin	NA	NA	NA	NA	NA	NA	NA	NA	NA	NA	NA	NA	NA	NA	NA	NA	NA	NA	NA	NA	NA	NA
CHE_AP4E	CHE_OSR_04_A	Apis mellifera	Switzerland	Oilseed rape	47.54499	61.62	172.287	59.474	6.891	1.14	6.35	7.52	Napropamide	Acetamiprid	Fluopyram	Prothioconazole	Pethoxamide	Bifenthrin	NA	NA	NA	NA	NA	NA	NA	NA	NA	NA	NA	NA	NA	NA	NA	NA	NA	NA	NA	NA	NA	NA
CHE_AP5A	CHE_OSR_05_A	Apis mellifera	Switzerland	Oilseed rape	47.61563	52.61	196.236	103.449	3.326	1.148	18	2.48	Indoxacarb	Napropamide	Propyzamide	NA	NA	NA	NA	NA	NA	NA	NA	NA	NA	NA	NA	NA	NA	NA	NA	NA	NA	NA	NA	NA	NA	NA	NA	NA
CHE_AP5B	CHE_OSR_05_A	Apis mellifera	Switzerland	Oilseed rape	47.61563	52.61	196.236	103.449	3.326	1.148	18	6.04	Indoxacarb	Napropamide	Propyzamide	NA	NA	NA	NA	NA	NA	NA	NA	NA	NA	NA	NA	NA	NA	NA	NA	NA	NA	NA	NA	NA	NA	NA	NA	NA
CHE_AP5C	CHE_OSR_05_A	Apis mellifera	Switzerland	Oilseed rape	47.61563	52.61	196.236	103.449	3.326	1.148	18	3.86	Indoxacarb	Napropamide	Propyzamide	NA	NA	NA	NA	NA	NA	NA	NA	NA	NA	NA	NA	NA	NA	NA	NA	NA	NA	NA	NA	NA	NA	NA	NA	NA
CHE_AP5D	CHE_OSR_05_A	Apis mellifera	Switzerland	Oilseed rape	47.61563	52.61	196.236	103.449	3.326	1.148	18	1.87	Indoxacarb	Napropamide	Propyzamide	NA	NA	NA	NA	NA	NA	NA	NA	NA	NA	NA	NA	NA	NA	NA	NA	NA	NA	NA	NA	NA	NA	NA	NA	NA
CHE_AP5E	CHE_OSR_05_A	Apis mellifera	Switzerland	Oilseed rape	47.61563	52.61	196.236	103.449	3.326	1.148	18	4.68	Indoxacarb	Napropamide	Propyzamide	NA	NA	NA	NA	NA	NA	NA	NA	NA	NA	NA	NA	NA	NA	NA	NA	NA	NA	NA	NA	NA	NA	NA	NA	NA
CHE_AP6A	CHE_OSR_06_A	Apis mellifera	Switzerland	Oilseed rape	47.68654	46.70	262.499	59.297	5.678	1.323	50	5.33	NA	NA	NA	NA	NA	NA	NA	NA	NA	NA	NA	NA	NA	NA	NA	NA	NA	NA	NA	NA	NA	NA	NA	NA	NA	NA	NA	NA
CHE_AP6B	CHE_OSR_06_A	Apis mellifera	Switzerland	Oilseed rape	47.68654	46.70	262.499	59.297	5.678	1.323	50	4.36	NA	NA	NA	NA	NA	NA	NA	NA	NA	NA	NA	NA	NA	NA	NA	NA	NA	NA	NA	NA	NA	NA	NA	NA	NA	NA	NA	NA
CHE_AP6C	CHE_OSR_06_A	Apis mellifera	Switzerland	Oilseed rape	47.68654	46.70	262.499	59.297	5.678	1.323	50	11.22	NA	NA	NA	NA	NA	NA	NA	NA	NA	NA	NA	NA	NA	NA	NA	NA	NA	NA	NA	NA	NA	NA	NA	NA	NA	NA	NA	NA
CHE_AP6D	CHE_OSR_06_A	Apis mellifera	Switzerland	Oilseed rape	47.68654	46.70	262.499	59.297	5.678	1.323	50	14.02	NA	NA	NA	NA	NA	NA	NA	NA	NA	NA	NA	NA	NA	NA	NA	NA	NA	NA	NA	NA	NA	NA	NA	NA	NA	NA	NA	NA
CHE_AP6E	CHE_OSR_06_A	Apis mellifera	Switzerland	Oilseed rape	47.68654	46.70	262.499	59.297	5.678	1.323	50	6.90	NA	NA	NA	NA	NA	NA	NA	NA	NA	NA	NA	NA	NA	NA	NA	NA	NA	NA	NA	NA	NA	NA	NA	NA	NA	NA	NA	NA
CHE_AP7A	CHE_OSR_07_A	Apis mellifera	Switzerland	Oilseed rape	47.47796	51	218.362	66.599	10.405	1.372	6.675	2.40	NA	NA	NA	NA	NA	NA	NA	NA	NA	NA	NA	NA	NA	NA	NA	NA	NA	NA	NA	NA	NA	NA	NA	NA	NA	NA	NA	NA
CHE_AP7B	CHE_OSR_07_A	Apis mellifera	Switzerland	Oilseed rape	47.47796	51	218.362	66.599	10.405	1.372	6.675	2.09	NA	NA	NA	NA	NA	NA	NA	NA	NA	NA	NA	NA	NA	NA	NA	NA	NA	NA	NA	NA	NA	NA	NA	NA	NA	NA	NA	NA
CHE_AP7C	CHE_OSR_07_A	Apis mellifera	Switzerland	Oilseed rape	47.47796	51	218.362	66.599	10.405	1.372	6.675	2.52	NA	NA	NA	NA	NA	NA	NA	NA	NA	NA	NA	NA	NA	NA	NA	NA	NA	NA	NA	NA	NA	NA	NA	NA	NA	NA	NA	NA
CHE_AP7D	CHE_OSR_07_A	Apis mellifera	Switzerland	Oilseed rape	47.47796	51	218.362	66.599	10.405	1.372	6.675	5.52	NA	NA	NA	NA	NA	NA	NA	NA	NA	NA	NA	NA	NA	NA	NA	NA	NA	NA	NA	NA	NA	NA	NA	NA	NA	NA	NA	NA
CHE_AP7E	CHE_OSR_07_A	Apis mellifera	Switzerland	Oilseed rape	47.47796	51	218.362	66.599	10.405	1.372	6.675	4.04	NA	NA	NA	NA	NA	NA	NA	NA	NA	NA	NA	NA	NA	NA	NA	NA	NA	NA	NA	NA	NA	NA	NA	NA	NA	NA	NA	NA
CHE_AP8A	CHE_OSR_08_A	Apis mellifera	Switzerland	Oilseed rape	47.56715	43.39	291.888	66.516	10.32	1.371	NA	3.41	NA	NA	NA	NA	NA	NA	NA	NA	NA	NA	NA	NA	NA	NA	NA	NA	NA	NA	NA	NA	NA	NA	NA	NA	NA	NA	NA	NA
CHE_AP8B	CHE_OSR_08_A	Apis mellifera	Switzerland	Oilseed rape	47.56715	43.39	291.888	66.516	10.32	1.371	NA	4.89	NA	NA	NA	NA	NA	NA	NA	NA	NA	NA	NA	NA	NA	NA	NA	NA	NA	NA	NA	NA	NA	NA	NA	NA	NA	NA	NA	NA
CHE_AP8C	CHE_OSR_08_A	Apis mellifera	Switzerland	Oilseed rape	47.56715	43.39	291.888	66.516	10.32	1.371	NA	2.44	NA	NA	NA	NA	NA	NA	NA	NA	NA	NA	NA	NA	NA	NA	NA	NA	NA	NA	NA	NA	NA	NA	NA	NA	NA	NA	NA	NA
CHE_AP8D	CHE_OSR_08_A	Apis mellifera	Switzerland	Oilseed rape	47.56715	43.39	291.888	66.516	10.32	1.371	NA	5.94	NA	NA	NA	NA	NA	NA	NA	NA	NA	NA	NA	NA	NA	NA	NA	NA	NA	NA	NA	NA	NA	NA	NA	NA	NA	NA	NA	NA
CHE_AP8E	CHE_OSR_08_A	Apis mellifera	Switzerland	Oilseed rape	47.56715	43.39	291.888	66.516	10.32	1.371	NA	1.58	NA	NA	NA	NA	NA	NA	NA	NA	NA	NA	NA	NA	NA	NA	NA	NA	NA	NA	NA	NA	NA	NA	NA	NA	NA	NA	NA	NA
CHE_AP9A	CHE_APP_09_A	Apis mellifera	Switzerland	Apple	47.52853	51.21	314.351	43.971	16.752	1.496	50.47	4.01	Acibenzolar-S-methyl	Cyprodinil	Captan	Indoxacarb	Dodine	Myclobutanil	Trifloxystrobin	Paraffin oil	NA	NA	NA	NA	NA	NA	NA	NA	NA	NA	NA	NA	NA	NA	NA	NA	NA	NA	NA	NA
CHE_AP9B	CHE_APP_09_A	Apis mellifera	Switzerland	Apple	47.52853	51.21	314.351	43.971	16.752	1.496	50.47	2.49	Acibenzolar-S-methyl	Cyprodinil	Captan	Indoxacarb	Dodine	Myclobutanil	Trifloxystrobin	Paraffin oil	NA	NA	NA	NA	NA	NA	NA	NA	NA	NA	NA	NA	NA	NA	NA	NA	NA	NA	NA	NA
CHE_AP9C	CHE_APP_09_A	Apis mellifera	Switzerland	Apple	47.52853	51.21	314.351	43.971	16.752	1.496	50.47	1.96	Acibenzolar-S-methyl	Cyprodinil	Captan	Indoxacarb	Dodine	Myclobutanil	Trifloxystrobin	Paraffin oil	NA	NA	NA	NA	NA	NA	NA	NA	NA	NA	NA	NA	NA	NA	NA	NA	NA	NA	NA	NA
CHE_AP9D	CHE_APP_09_A	Apis mellifera	Switzerland	Apple	47.52853	51.21	314.351	43.971	16.752	1.496	50.47	5.39	Acibenzolar-S-methyl	Cyprodinil	Captan	Indoxacarb	Dodine	Myclobutanil	Trifloxystrobin	Paraffin oil	NA	NA	NA	NA	NA	NA	NA	NA	NA	NA	NA	NA	NA	NA	NA	NA	NA	NA	NA	NA
CHE_AP9E	CHE_APP_09_A	Apis mellifera	Switzerland	Apple	47.52853	51.21	314.351	43.971	16.752	1.496	50.47	10.16	Acibenzolar-S-methyl	Cyprodinil	Captan	Indoxacarb	Dodine	Myclobutanil	Trifloxystrobin	Paraffin oil	NA	NA	NA	NA	NA	NA	NA	NA	NA	NA	NA	NA	NA	NA	NA	NA	NA	NA	NA	NA
CHE_AP10A	CHE_APP_10_A	Apis mellifera	Switzerland	Apple	47.53528	43.56	289.338	48.228	10.319	1.47	14.32	6.05	Acibenzolar-S-methyl	Cyprodinil	Copper Oxychloride	Dithianon	Acetamiprid	Difenoconazole	Sulphur	Penconazole	NA	NA	NA	NA	NA	NA	NA	NA	NA	NA	NA	NA	NA	NA	NA	NA	NA	NA	NA	NA
CHE_AP10B	CHE_APP_10_A	Apis mellifera	Switzerland	Apple	47.53528	43.56	289.338	48.228	10.319	1.47	14.32	16.80	Acibenzolar-S-methyl	Cyprodinil	Copper Oxychloride	Dithianon	Acetamiprid	Difenoconazole	Sulphur	Penconazole	NA	NA	NA	NA	NA	NA	NA	NA	NA	NA	NA	NA	NA	NA	NA	NA	NA	NA	NA	NA
CHE_AP10C	CHE_APP_10_A	Apis mellifera	Switzerland	Apple	47.53528	43.56	289.338	48.228	10.319	1.47	14.32	7.63	Acibenzolar-S-methyl	Cyprodinil	Copper Oxychloride	Dithianon	Acetamiprid	Difenoconazole	Sulphur	Penconazole	NA	NA	NA	NA	NA	NA	NA	NA	NA	NA	NA	NA	NA	NA	NA	NA	NA	NA	NA	NA
CHE_AP10D	CHE_APP_10_A	Apis mellifera	Switzerland	Apple	47.53528	43.56	289.338	48.228	10.319	1.47	14.32	3.49	Acibenzolar-S-methyl	Cyprodinil	Copper Oxychloride	Dithianon	Acetamiprid	Difenoconazole	Sulphur	Penconazole	NA	NA	NA	NA	NA	NA	NA	NA	NA	NA	NA	NA	NA	NA	NA	NA	NA	NA	NA	NA
CHE_AP10E	CHE_APP_10_A	Apis mellifera	Switzerland	Apple	47.53528	43.56	289.338	48.228	10.319	1.47	14.32	24.54	Acibenzolar-S-methyl	Cyprodinil	Copper Oxychloride	Dithianon	Acetamiprid	Difenoconazole	Sulphur	Penconazole	NA	NA	NA	NA	NA	NA	NA	NA	NA	NA	NA	NA	NA	NA	NA	NA	NA	NA	NA	NA
CHE_AP11A	CHE_APP_11_A	Apis mellifera	Switzerland	Apple	47.43467	24.39	181.194	28.134	7.851	1.394	14.19	7.52	Captan	Dithianon	Folpet	Mepanipyrim	Glyphosate	Difenoconazole	Sulphur	Laminarin	NA	NA	NA	NA	NA	NA	NA	NA	NA	NA	NA	NA	NA	NA	NA	NA	NA	NA	NA	NA
CHE_AP11B	CHE_APP_11_A	Apis mellifera	Switzerland	Apple	47.43467	24.39	181.194	28.134	7.851	1.394	14.19	4.93	Captan	Dithianon	Folpet	Mepanipyrim	Glyphosate	Difenoconazole	Sulphur	Laminarin	NA	NA	NA	NA	NA	NA	NA	NA	NA	NA	NA	NA	NA	NA	NA	NA	NA	NA	NA	NA
CHE_AP11C	CHE_APP_11_A	Apis mellifera	Switzerland	Apple	47.43467	24.39	181.194	28.134	7.851	1.394	14.19	6.13	Captan	Dithianon	Folpet	Mepanipyrim	Glyphosate	Difenoconazole	Sulphur	Laminarin	NA	NA	NA	NA	NA	NA	NA	NA	NA	NA	NA	NA	NA	NA	NA	NA	NA	NA	NA	NA
CHE_AP11D	CHE_APP_11_A	Apis mellifera	Switzerland	Apple	47.43467	24.39	181.194	28.134	7.851	1.394	14.19	13.10	Captan	Dithianon	Folpet	Mepanipyrim	Glyphosate	Difenoconazole	Sulphur	Laminarin	NA	NA	NA	NA	NA	NA	NA	NA	NA	NA	NA	NA	NA	NA	NA	NA	NA	NA	NA	NA
CHE_AP11E	CHE_APP_11_A	Apis mellifera	Switzerland	Apple	47.43467	24.39	181.194	28.134	7.851	1.394	14.19	14.29	Captan	Dithianon	Folpet	Mepanipyrim	Glyphosate	Difenoconazole	Sulphur	Laminarin	NA	NA	NA	NA	NA	NA	NA	NA	NA	NA	NA	NA	NA	NA	NA	NA	NA	NA	NA	NA
CHE_AP12A	CHE_APP_12_A	Apis mellifera	Switzerland	Apple	47.55152	56.89	235.565	15.937	7.276	1.128	50.24	5.94	Thiamethoxam	Dithianon	Pyrimethanil	Folpet	Horsetail Extract	Sulfuric Acid	Difenoconazole	Penconazole	Cyprodinil	Paraffin oil	NA	NA	NA	NA	NA	NA	NA	NA	NA	NA	NA	NA	NA	NA	NA	NA	NA	NA
CHE_AP12B	CHE_APP_12_A	Apis mellifera	Switzerland	Apple	47.55152	56.89	235.565	15.937	7.276	1.128	50.24	2.29	Thiamethoxam	Dithianon	Pyrimethanil	Folpet	Horsetail Extract	Sulfuric Acid	Difenoconazole	Penconazole	Cyprodinil	Paraffin oil	NA	NA	NA	NA	NA	NA	NA	NA	NA	NA	NA	NA	NA	NA	NA	NA	NA	NA
CHE_AP12C	CHE_APP_12_A	Apis mellifera	Switzerland	Apple	47.55152	56.89	235.565	15.937	7.276	1.128	50.24	2.98	Thiamethoxam	Dithianon	Pyrimethanil	Folpet	Horsetail Extract	Sulfuric Acid	Difenoconazole	Penconazole	Cyprodinil	Paraffin oil	NA	NA	NA	NA	NA	NA	NA	NA	NA	NA	NA	NA	NA	NA	NA	NA	NA	NA
CHE_AP12D	CHE_APP_12_A	Apis mellifera	Switzerland	Apple	47.55152	56.89	235.565	15.937	7.276	1.128	50.24	6.31	Thiamethoxam	Dithianon	Pyrimethanil	Folpet	Horsetail Extract	Sulfuric Acid	Difenoconazole	Penconazole	Cyprodinil	Paraffin oil	NA	NA	NA	NA	NA	NA	NA	NA	NA	NA	NA	NA	NA	NA	NA	NA	NA	NA
CHE_AP12E	CHE_APP_12_A	Apis mellifera	Switzerland	Apple	47.55152	56.89	235.565	15.937	7.276	1.128	50.24	10.74	Thiamethoxam	Dithianon	Pyrimethanil	Folpet	Horsetail Extract	Sulfuric Acid	Difenoconazole	Penconazole	Cyprodinil	Paraffin oil	NA	NA	NA	NA	NA	NA	NA	NA	NA	NA	NA	NA	NA	NA	NA	NA	NA	NA
CHE_AP13A	CHE_APP_13_A	Apis mellifera	Switzerland	Apple	47.53289	41.21	315.275	71.123	15.858	1.439	149.7	2.24	Copper oxychloride	Copper hydroxide	Calcium polysulfide	Horsetail Extract	Sulfuric Acid	Azadirachtin	Sulphur	Potassium Bicarbonate	NA	NA	NA	NA	NA	NA	NA	NA	NA	NA	NA	NA	NA	NA	NA	NA	NA	NA	NA	NA
CHE_AP13B	CHE_APP_13_A	Apis mellifera	Switzerland	Apple	47.53289	41.21	315.275	71.123	15.858	1.439	149.7	2.54	Copper oxychloride	Copper hydroxide	Calcium polysulfide	Horsetail Extract	Sulfuric Acid	Azadirachtin	Sulphur	Potassium Bicarbonate	NA	NA	NA	NA	NA	NA	NA	NA	NA	NA	NA	NA	NA	NA	NA	NA	NA	NA	NA	NA
CHE_AP13C	CHE_APP_13_A	Apis mellifera	Switzerland	Apple	47.53289	41.21	315.275	71.123	15.858	1.439	149.7	2.04	Copper oxychloride	Copper hydroxide	Calcium polysulfide	Horsetail Extract	Sulfuric Acid	Azadirachtin	Sulphur	Potassium Bicarbonate	NA	NA	NA	NA	NA	NA	NA	NA	NA	NA	NA	NA	NA	NA	NA	NA	NA	NA	NA	NA
CHE_AP13D	CHE_APP_13_A	Apis mellifera	Switzerland	Apple	47.53289	41.21	315.275	71.123	15.858	1.439	149.7	1.97	Copper oxychloride	Copper hydroxide	Calcium polysulfide	Horsetail Extract	Sulfuric Acid	Azadirachtin	Sulphur	Potassium Bicarbonate	NA	NA	NA	NA	NA	NA	NA	NA	NA	NA	NA	NA	NA	NA	NA	NA	NA	NA	NA	NA
CHE_AP13E	CHE_APP_13_A	Apis mellifera	Switzerland	Apple	47.53289	41.21	315.275	71.123	15.858	1.439	149.7	2.50	Copper oxychloride	Copper hydroxide	Calcium polysulfide	Horsetail Extract	Sulfuric Acid	Azadirachtin	Sulphur	Potassium Bicarbonate	NA	NA	NA	NA	NA	NA	NA	NA	NA	NA	NA	NA	NA	NA	NA	NA	NA	NA	NA	NA
CHE_AP14A	CHE_APP_14_A	Apis mellifera	Switzerland	Apple	47.60911	43.94	257.003	106.993	21.253	1.617	16.35	4.08	Thiophanate-methyl	Cyprodinil	Dithianon	Sulphur	Difenoconazole	NA	NA	NA	NA	NA	NA	NA	NA	NA	NA	NA	NA	NA	NA	NA	NA	NA	NA	NA	NA	NA	NA	NA
CHE_AP14B	CHE_APP_14_A	Apis mellifera	Switzerland	Apple	47.60911	43.94	257.003	106.993	21.253	1.617	16.35	3.64	Thiophanate-methyl	Cyprodinil	Dithianon	Sulphur	Difenoconazole	NA	NA	NA	NA	NA	NA	NA	NA	NA	NA	NA	NA	NA	NA	NA	NA	NA	NA	NA	NA	NA	NA	NA
CHE_AP14C	CHE_APP_14_A	Apis mellifera	Switzerland	Apple	47.60911	43.94	257.003	106.993	21.253	1.617	16.35	1.77	Thiophanate-methyl	Cyprodinil	Dithianon	Sulphur	Difenoconazole	NA	NA	NA	NA	NA	NA	NA	NA	NA	NA	NA	NA	NA	NA	NA	NA	NA	NA	NA	NA	NA	NA	NA
CHE_AP14D	CHE_APP_14_A	Apis mellifera	Switzerland	Apple	47.60911	43.94	257.003	106.993	21.253	1.617	16.35	3.12	Thiophanate-methyl	Cyprodinil	Dithianon	Sulphur	Difenoconazole	NA	NA	NA	NA	NA	NA	NA	NA	NA	NA	NA	NA	NA	NA	NA	NA	NA	NA	NA	NA	NA	NA	NA
CHE_AP14E	CHE_APP_14_A	Apis mellifera	Switzerland	Apple	47.60911	43.94	257.003	106.993	21.253	1.617	16.35	2.12	Thiophanate-methyl	Cyprodinil	Dithianon	Sulphur	Difenoconazole	NA	NA	NA	NA	NA	NA	NA	NA	NA	NA	NA	NA	NA	NA	NA	NA	NA	NA	NA	NA	NA	NA	NA
CHE_AP15A	CHE_APP_15_A	Apis mellifera	Switzerland	Apple	47.63127	55.65	249.725	77.758	19.178	1.535	34.4	2.58	Captan	Sulphur	Fluxapyroxad	Myclobutanil	Copper oxychloride	Paraffin oil	NA	NA	NA	NA	NA	NA	NA	NA	NA	NA	NA	NA	NA	NA	NA	NA	NA	NA	NA	NA	NA	NA
CHE_AP15B	CHE_APP_15_A	Apis mellifera	Switzerland	Apple	47.63127	55.65	249.725	77.758	19.178	1.535	34.4	2.16	Captan	Sulphur	Fluxapyroxad	Myclobutanil	Copper oxychloride	Paraffin oil	NA	NA	NA	NA	NA	NA	NA	NA	NA	NA	NA	NA	NA	NA	NA	NA	NA	NA	NA	NA	NA	NA
CHE_AP15C	CHE_APP_15_A	Apis mellifera	Switzerland	Apple	47.63127	55.65	249.725	77.758	19.178	1.535	34.4	1.67	Captan	Sulphur	Fluxapyroxad	Myclobutanil	Copper oxychloride	Paraffin oil	NA	NA	NA	NA	NA	NA	NA	NA	NA	NA	NA	NA	NA	NA	NA	NA	NA	NA	NA	NA	NA	NA
CHE_AP15D	CHE_APP_15_A	Apis mellifera	Switzerland	Apple	47.63127	55.65	249.725	77.758	19.178	1.535	34.4	3.45	Captan	Sulphur	Fluxapyroxad	Myclobutanil	Copper oxychloride	Paraffin oil	NA	NA	NA	NA	NA	NA	NA	NA	NA	NA	NA	NA	NA	NA	NA	NA	NA	NA	NA	NA	NA	NA
CHE_AP15E	CHE_APP_15_A	Apis mellifera	Switzerland	Apple	47.63127	55.65	249.725	77.758	19.178	1.535	34.4	3.50	Captan	Sulphur	Fluxapyroxad	Myclobutanil	Copper oxychloride	Paraffin oil	NA	NA	NA	NA	NA	NA	NA	NA	NA	NA	NA	NA	NA	NA	NA	NA	NA	NA	NA	NA	NA	NA
CHE_AP16A	CHE_APP_16_A	Apis mellifera	Switzerland	Apple	47.48491	26.27	314.782	149.727	6.763	1.544	NA	2.69	NA	NA	NA	NA	NA	NA	NA	NA	NA	NA	NA	NA	NA	NA	NA	NA	NA	NA	NA	NA	NA	NA	NA	NA	NA	NA	NA	NA
CHE_AP16B	CHE_APP_16_A	Apis mellifera	Switzerland	Apple	47.48491	26.27	314.782	149.727	6.763	1.544	NA	2.82	NA	NA	NA	NA	NA	NA	NA	NA	NA	NA	NA	NA	NA	NA	NA	NA	NA	NA	NA	NA	NA	NA	NA	NA	NA	NA	NA	NA
CHE_AP16C	CHE_APP_16_A	Apis mellifera	Switzerland	Apple	47.48491	26.27	314.782	149.727	6.763	1.544	NA	2.00	NA	NA	NA	NA	NA	NA	NA	NA	NA	NA	NA	NA	NA	NA	NA	NA	NA	NA	NA	NA	NA	NA	NA	NA	NA	NA	NA	NA
CHE_AP16D	CHE_APP_16_A	Apis mellifera	Switzerland	Apple	47.48491	26.27	314.782	149.727	6.763	1.544	NA	4.27	NA	NA	NA	NA	NA	NA	NA	NA	NA	NA	NA	NA	NA	NA	NA	NA	NA	NA	NA	NA	NA	NA	NA	NA	NA	NA	NA	NA
CHE_AP16E	CHE_APP_16_A	Apis mellifera	Switzerland	Apple	47.48491	26.27	314.782	149.727	6.763	1.544	NA	3.18	NA	NA	NA	NA	NA	NA	NA	NA	NA	NA	NA	NA	NA	NA	NA	NA	NA	NA	NA	NA	NA	NA	NA	NA	NA	NA	NA	NA
CHE_B1A	CHE_OSR_01_B	Bombus terrestris	Switzerland	Oilseed rape	47.43632	44.82	284.463	61.506	3.521	1.492	3	7.69	Napropamide	NA	NA	NA	NA	NA	NA	NA	NA	NA	NA	NA	NA	NA	NA	NA	NA	NA	NA	NA	NA	NA	NA	NA	NA	NA	NA	NA
CHE_B1B	CHE_OSR_01_B	Bombus terrestris	Switzerland	Oilseed rape	47.43632	44.82	284.463	61.506	3.521	1.492	3	10.64	Napropamide	NA	NA	NA	NA	NA	NA	NA	NA	NA	NA	NA	NA	NA	NA	NA	NA	NA	NA	NA	NA	NA	NA	NA	NA	NA	NA	NA
CHE_B1C	CHE_OSR_01_B	Bombus terrestris	Switzerland	Oilseed rape	47.43632	44.82	284.463	61.506	3.521	1.492	3	7.03	Napropamide	NA	NA	NA	NA	NA	NA	NA	NA	NA	NA	NA	NA	NA	NA	NA	NA	NA	NA	NA	NA	NA	NA	NA	NA	NA	NA	NA
CHE_B1D	CHE_OSR_01_B	Bombus terrestris	Switzerland	Oilseed rape	47.43632	44.82	284.463	61.506	3.521	1.492	3	7.11	Napropamide	NA	NA	NA	NA	NA	NA	NA	NA	NA	NA	NA	NA	NA	NA	NA	NA	NA	NA	NA	NA	NA	NA	NA	NA	NA	NA	NA
CHE_B1E	CHE_OSR_01_B	Bombus terrestris	Switzerland	Oilseed rape	47.43632	44.82	284.463	61.506	3.521	1.492	3	7.85	Napropamide	NA	NA	NA	NA	NA	NA	NA	NA	NA	NA	NA	NA	NA	NA	NA	NA	NA	NA	NA	NA	NA	NA	NA	NA	NA	NA	NA
CHE_B2A	CHE_OSR_02_B	Bombus terrestris	Switzerland	Oilseed rape	47.45213	48.08	291.889	80.253	22.263	1.424	6.275	7.52	Napropamide	Lambda-cyhalothrin	Fluopyram	Prothioconazole	Tebuconazole	NA	NA	NA	NA	NA	NA	NA	NA	NA	NA	NA	NA	NA	NA	NA	NA	NA	NA	NA	NA	NA	NA	NA
CHE_B2B	CHE_OSR_02_B	Bombus terrestris	Switzerland	Oilseed rape	47.45213	48.08	291.889	80.253	22.263	1.424	6.275	8.52	Napropamide	Lambda-cyhalothrin	Fluopyram	Prothioconazole	Tebuconazole	NA	NA	NA	NA	NA	NA	NA	NA	NA	NA	NA	NA	NA	NA	NA	NA	NA	NA	NA	NA	NA	NA	NA
CHE_B2C	CHE_OSR_02_B	Bombus terrestris	Switzerland	Oilseed rape	47.45213	48.08	291.889	80.253	22.263	1.424	6.275	7.11	Napropamide	Lambda-cyhalothrin	Fluopyram	Prothioconazole	Tebuconazole	NA	NA	NA	NA	NA	NA	NA	NA	NA	NA	NA	NA	NA	NA	NA	NA	NA	NA	NA	NA	NA	NA	NA
CHE_B2D	CHE_OSR_02_B	Bombus terrestris	Switzerland	Oilseed rape	47.45213	48.08	291.889	80.253	22.263	1.424	6.275	6.63	Napropamide	Lambda-cyhalothrin	Fluopyram	Prothioconazole	Tebuconazole	NA	NA	NA	NA	NA	NA	NA	NA	NA	NA	NA	NA	NA	NA	NA	NA	NA	NA	NA	NA	NA	NA	NA
CHE_B2E	CHE_OSR_02_B	Bombus terrestris	Switzerland	Oilseed rape	47.45213	48.08	291.889	80.253	22.263	1.424	6.275	10.34	Napropamide	Lambda-cyhalothrin	Fluopyram	Prothioconazole	Tebuconazole	NA	NA	NA	NA	NA	NA	NA	NA	NA	NA	NA	NA	NA	NA	NA	NA	NA	NA	NA	NA	NA	NA	NA
CHE_B3A	CHE_OSR_03_B	Bombus terrestris	Switzerland	Oilseed rape	47.49278	37.90	291.078	107.52	8.687	1.448	1.05	8.76	Tebuconazole	NA	NA	NA	NA	NA	NA	NA	NA	NA	NA	NA	NA	NA	NA	NA	NA	NA	NA	NA	NA	NA	NA	NA	NA	NA	NA	NA
CHE_B3B	CHE_OSR_03_B	Bombus terrestris	Switzerland	Oilseed rape	47.49278	37.90	291.078	107.52	8.687	1.448	1.05	8.10	Tebuconazole	NA	NA	NA	NA	NA	NA	NA	NA	NA	NA	NA	NA	NA	NA	NA	NA	NA	NA	NA	NA	NA	NA	NA	NA	NA	NA	NA
CHE_B3C	CHE_OSR_03_B	Bombus terrestris	Switzerland	Oilseed rape	47.49278	37.90	291.078	107.52	8.687	1.448	1.05	8.89	Tebuconazole	NA	NA	NA	NA	NA	NA	NA	NA	NA	NA	NA	NA	NA	NA	NA	NA	NA	NA	NA	NA	NA	NA	NA	NA	NA	NA	NA
CHE_B3D	CHE_OSR_03_B	Bombus terrestris	Switzerland	Oilseed rape	47.49278	37.90	291.078	107.52	8.687	1.448	1.05	6.65	Tebuconazole	NA	NA	NA	NA	NA	NA	NA	NA	NA	NA	NA	NA	NA	NA	NA	NA	NA	NA	NA	NA	NA	NA	NA	NA	NA	NA	NA
CHE_B3E	CHE_OSR_03_B	Bombus terrestris	Switzerland	Oilseed rape	47.49278	37.90	291.078	107.52	8.687	1.448	1.05	12.64	Tebuconazole	NA	NA	NA	NA	NA	NA	NA	NA	NA	NA	NA	NA	NA	NA	NA	NA	NA	NA	NA	NA	NA	NA	NA	NA	NA	NA	NA
CHE_B4A	CHE_OSR_04_B	Bombus terrestris	Switzerland	Oilseed rape	47.54499	61.62	172.287	59.474	6.891	1.14	6.35	7.27	Napropamide	Acetamiprid	Fluopyram	Prothioconazole	Pethoxamide	Bifenthrin	NA	NA	NA	NA	NA	NA	NA	NA	NA	NA	NA	NA	NA	NA	NA	NA	NA	NA	NA	NA	NA	NA
CHE_B4B	CHE_OSR_04_B	Bombus terrestris	Switzerland	Oilseed rape	47.54499	61.62	172.287	59.474	6.891	1.14	6.35	8.61	Napropamide	Acetamiprid	Fluopyram	Prothioconazole	Pethoxamide	Bifenthrin	NA	NA	NA	NA	NA	NA	NA	NA	NA	NA	NA	NA	NA	NA	NA	NA	NA	NA	NA	NA	NA	NA
CHE_B4C	CHE_OSR_04_B	Bombus terrestris	Switzerland	Oilseed rape	47.54499	61.62	172.287	59.474	6.891	1.14	6.35	6.88	Napropamide	Acetamiprid	Fluopyram	Prothioconazole	Pethoxamide	Bifenthrin	NA	NA	NA	NA	NA	NA	NA	NA	NA	NA	NA	NA	NA	NA	NA	NA	NA	NA	NA	NA	NA	NA
CHE_B4D	CHE_OSR_04_B	Bombus terrestris	Switzerland	Oilseed rape	47.54499	61.62	172.287	59.474	6.891	1.14	6.35	7.90	Napropamide	Acetamiprid	Fluopyram	Prothioconazole	Pethoxamide	Bifenthrin	NA	NA	NA	NA	NA	NA	NA	NA	NA	NA	NA	NA	NA	NA	NA	NA	NA	NA	NA	NA	NA	NA
CHE_B4E	CHE_OSR_04_B	Bombus terrestris	Switzerland	Oilseed rape	47.54499	61.62	172.287	59.474	6.891	1.14	6.35	8.19	Napropamide	Acetamiprid	Fluopyram	Prothioconazole	Pethoxamide	Bifenthrin	NA	NA	NA	NA	NA	NA	NA	NA	NA	NA	NA	NA	NA	NA	NA	NA	NA	NA	NA	NA	NA	NA
CHE_B5A	CHE_OSR_05_B	Bombus terrestris	Switzerland	Oilseed rape	47.61563	52.61	196.236	103.449	3.326	1.148	18	9.45	Indoxacarb	Napropamide	Propyzamide	NA	NA	NA	NA	NA	NA	NA	NA	NA	NA	NA	NA	NA	NA	NA	NA	NA	NA	NA	NA	NA	NA	NA	NA	NA
CHE_B5B	CHE_OSR_05_B	Bombus terrestris	Switzerland	Oilseed rape	47.61563	52.61	196.236	103.449	3.326	1.148	18	10.96	Indoxacarb	Napropamide	Propyzamide	NA	NA	NA	NA	NA	NA	NA	NA	NA	NA	NA	NA	NA	NA	NA	NA	NA	NA	NA	NA	NA	NA	NA	NA	NA
CHE_B5C	CHE_OSR_05_B	Bombus terrestris	Switzerland	Oilseed rape	47.61563	52.61	196.236	103.449	3.326	1.148	18	10.74	Indoxacarb	Napropamide	Propyzamide	NA	NA	NA	NA	NA	NA	NA	NA	NA	NA	NA	NA	NA	NA	NA	NA	NA	NA	NA	NA	NA	NA	NA	NA	NA
CHE_B5D	CHE_OSR_05_B	Bombus terrestris	Switzerland	Oilseed rape	47.61563	52.61	196.236	103.449	3.326	1.148	18	12.37	Indoxacarb	Napropamide	Propyzamide	NA	NA	NA	NA	NA	NA	NA	NA	NA	NA	NA	NA	NA	NA	NA	NA	NA	NA	NA	NA	NA	NA	NA	NA	NA
CHE_B5E	CHE_OSR_05_B	Bombus terrestris	Switzerland	Oilseed rape	47.61563	52.61	196.236	103.449	3.326	1.148	18	8.36	Indoxacarb	Napropamide	Propyzamide	NA	NA	NA	NA	NA	NA	NA	NA	NA	NA	NA	NA	NA	NA	NA	NA	NA	NA	NA	NA	NA	NA	NA	NA	NA
CHE_B6A	CHE_OSR_06_B	Bombus terrestris	Switzerland	Oilseed rape	47.68654	46.70	262.499	59.297	5.678	1.323	50	13.37	NA	NA	NA	NA	NA	NA	NA	NA	NA	NA	NA	NA	NA	NA	NA	NA	NA	NA	NA	NA	NA	NA	NA	NA	NA	NA	NA	NA
CHE_B6B	CHE_OSR_06_B	Bombus terrestris	Switzerland	Oilseed rape	47.68654	46.70	262.499	59.297	5.678	1.323	50	12.64	NA	NA	NA	NA	NA	NA	NA	NA	NA	NA	NA	NA	NA	NA	NA	NA	NA	NA	NA	NA	NA	NA	NA	NA	NA	NA	NA	NA
CHE_B6C	CHE_OSR_06_B	Bombus terrestris	Switzerland	Oilseed rape	47.68654	46.70	262.499	59.297	5.678	1.323	50	12.70	NA	NA	NA	NA	NA	NA	NA	NA	NA	NA	NA	NA	NA	NA	NA	NA	NA	NA	NA	NA	NA	NA	NA	NA	NA	NA	NA	NA
CHE_B6D	CHE_OSR_06_B	Bombus terrestris	Switzerland	Oilseed rape	47.68654	46.70	262.499	59.297	5.678	1.323	50	15.57	NA	NA	NA	NA	NA	NA	NA	NA	NA	NA	NA	NA	NA	NA	NA	NA	NA	NA	NA	NA	NA	NA	NA	NA	NA	NA	NA	NA
CHE_B6E	CHE_OSR_06_B	Bombus terrestris	Switzerland	Oilseed rape	47.68654	46.70	262.499	59.297	5.678	1.323	50	10.11	NA	NA	NA	NA	NA	NA	NA	NA	NA	NA	NA	NA	NA	NA	NA	NA	NA	NA	NA	NA	NA	NA	NA	NA	NA	NA	NA	NA
CHE_B7A	CHE_OSR_07_B	Bombus terrestris	Switzerland	Oilseed rape	47.47796	51	218.362	66.599	10.405	1.372	6.675	6.17	Clomazone	Dimethachlor	Napropamide	Metconazol	Mepiquat-chloride	Cypermethrin	Lambda-cyhalothrin	NA	NA	NA	NA	NA	NA	NA	NA	NA	NA	NA	NA	NA	NA	NA	NA	NA	NA	NA	NA	NA
CHE_B7B	CHE_OSR_07_B	Bombus terrestris	Switzerland	Oilseed rape	47.47796	51	218.362	66.599	10.405	1.372	6.675	12.59	Clomazone	Dimethachlor	Napropamide	Metconazol	Mepiquat-chloride	Cypermethrin	Lambda-cyhalothrin	NA	NA	NA	NA	NA	NA	NA	NA	NA	NA	NA	NA	NA	NA	NA	NA	NA	NA	NA	NA	NA
CHE_B7C	CHE_OSR_07_B	Bombus terrestris	Switzerland	Oilseed rape	47.47796	51	218.362	66.599	10.405	1.372	6.675	10.90	Clomazone	Dimethachlor	Napropamide	Metconazol	Mepiquat-chloride	Cypermethrin	Lambda-cyhalothrin	NA	NA	NA	NA	NA	NA	NA	NA	NA	NA	NA	NA	NA	NA	NA	NA	NA	NA	NA	NA	NA
CHE_B7D	CHE_OSR_07_B	Bombus terrestris	Switzerland	Oilseed rape	47.47796	51	218.362	66.599	10.405	1.372	6.675	8.91	Clomazone	Dimethachlor	Napropamide	Metconazol	Mepiquat-chloride	Cypermethrin	Lambda-cyhalothrin	NA	NA	NA	NA	NA	NA	NA	NA	NA	NA	NA	NA	NA	NA	NA	NA	NA	NA	NA	NA	NA
CHE_B7E	CHE_OSR_07_B	Bombus terrestris	Switzerland	Oilseed rape	47.47796	51	218.362	66.599	10.405	1.372	6.675	6.78	Clomazone	Dimethachlor	Napropamide	Metconazol	Mepiquat-chloride	Cypermethrin	Lambda-cyhalothrin	NA	NA	NA	NA	NA	NA	NA	NA	NA	NA	NA	NA	NA	NA	NA	NA	NA	NA	NA	NA	NA
CHE_B8A	CHE_OSR_08_B	Bombus terrestris	Switzerland	Oilseed rape	47.56715	43.39	291.888	66.516	10.32	1.371	NA	8.17	NA	NA	NA	NA	NA	NA	NA	NA	NA	NA	NA	NA	NA	NA	NA	NA	NA	NA	NA	NA	NA	NA	NA	NA	NA	NA	NA	NA
CHE_B8B	CHE_OSR_08_B	Bombus terrestris	Switzerland	Oilseed rape	47.56715	43.39	291.888	66.516	10.32	1.371	NA	8.91	NA	NA	NA	NA	NA	NA	NA	NA	NA	NA	NA	NA	NA	NA	NA	NA	NA	NA	NA	NA	NA	NA	NA	NA	NA	NA	NA	NA
CHE_B8C	CHE_OSR_08_B	Bombus terrestris	Switzerland	Oilseed rape	47.56715	43.39	291.888	66.516	10.32	1.371	NA	8.73	NA	NA	NA	NA	NA	NA	NA	NA	NA	NA	NA	NA	NA	NA	NA	NA	NA	NA	NA	NA	NA	NA	NA	NA	NA	NA	NA	NA
CHE_B8D	CHE_OSR_08_B	Bombus terrestris	Switzerland	Oilseed rape	47.56715	43.39	291.888	66.516	10.32	1.371	NA	8.49	NA	NA	NA	NA	NA	NA	NA	NA	NA	NA	NA	NA	NA	NA	NA	NA	NA	NA	NA	NA	NA	NA	NA	NA	NA	NA	NA	NA
CHE_B8E	CHE_OSR_08_B	Bombus terrestris	Switzerland	Oilseed rape	47.56715	43.39	291.888	66.516	10.32	1.371	NA	9.31	NA	NA	NA	NA	NA	NA	NA	NA	NA	NA	NA	NA	NA	NA	NA	NA	NA	NA	NA	NA	NA	NA	NA	NA	NA	NA	NA	NA
CHE_B9A	CHE_APP_09_B	Bombus terrestris	Switzerland	Apple	47.52853	51.21	314.351	43.971	16.752	1.496	50.47	8.77	Acibenzolar-S-methyl	Cyprodinil	Captan	Indoxacarb	Dodine	Myclobutanil	Trifloxystrobin	Paraffin oil	NA	NA	NA	NA	NA	NA	NA	NA	NA	NA	NA	NA	NA	NA	NA	NA	NA	NA	NA	NA
CHE_B9B	CHE_APP_09_B	Bombus terrestris	Switzerland	Apple	47.52853	51.21	314.351	43.971	16.752	1.496	50.47	8.79	Acibenzolar-S-methyl	Cyprodinil	Captan	Indoxacarb	Dodine	Myclobutanil	Trifloxystrobin	Paraffin oil	NA	NA	NA	NA	NA	NA	NA	NA	NA	NA	NA	NA	NA	NA	NA	NA	NA	NA	NA	NA
CHE_B9C	CHE_APP_09_B	Bombus terrestris	Switzerland	Apple	47.52853	51.21	314.351	43.971	16.752	1.496	50.47	10.64	Acibenzolar-S-methyl	Cyprodinil	Captan	Indoxacarb	Dodine	Myclobutanil	Trifloxystrobin	Paraffin oil	NA	NA	NA	NA	NA	NA	NA	NA	NA	NA	NA	NA	NA	NA	NA	NA	NA	NA	NA	NA
CHE_B9D	CHE_APP_09_B	Bombus terrestris	Switzerland	Apple	47.52853	51.21	314.351	43.971	16.752	1.496	50.47	10.81	Acibenzolar-S-methyl	Cyprodinil	Captan	Indoxacarb	Dodine	Myclobutanil	Trifloxystrobin	Paraffin oil	NA	NA	NA	NA	NA	NA	NA	NA	NA	NA	NA	NA	NA	NA	NA	NA	NA	NA	NA	NA
CHE_B9E	CHE_APP_09_B	Bombus terrestris	Switzerland	Apple	47.52853	51.21	314.351	43.971	16.752	1.496	50.47	10.89	Acibenzolar-S-methyl	Cyprodinil	Captan	Indoxacarb	Dodine	Myclobutanil	Trifloxystrobin	Paraffin oil	NA	NA	NA	NA	NA	NA	NA	NA	NA	NA	NA	NA	NA	NA	NA	NA	NA	NA	NA	NA
CHE_B10A	CHE_APP_10_B	Bombus terrestris	Switzerland	Apple	47.53528	43.56	289.338	48.228	10.319	1.47	14.32	7.06	Acibenzolar-S-methyl	Cyprodinil	Copper Oxychloride	Dithianon	Acetamiprid	Difenoconazole	Sulphur	Penconazole	NA	NA	NA	NA	NA	NA	NA	NA	NA	NA	NA	NA	NA	NA	NA	NA	NA	NA	NA	NA
CHE_B10B	CHE_APP_10_B	Bombus terrestris	Switzerland	Apple	47.53528	43.56	289.338	48.228	10.319	1.47	14.32	7.87	Acibenzolar-S-methyl	Cyprodinil	Copper Oxychloride	Dithianon	Acetamiprid	Difenoconazole	Sulphur	Penconazole	NA	NA	NA	NA	NA	NA	NA	NA	NA	NA	NA	NA	NA	NA	NA	NA	NA	NA	NA	NA
CHE_B10C	CHE_APP_10_B	Bombus terrestris	Switzerland	Apple	47.53528	43.56	289.338	48.228	10.319	1.47	14.32	8.88	Acibenzolar-S-methyl	Cyprodinil	Copper Oxychloride	Dithianon	Acetamiprid	Difenoconazole	Sulphur	Penconazole	NA	NA	NA	NA	NA	NA	NA	NA	NA	NA	NA	NA	NA	NA	NA	NA	NA	NA	NA	NA
CHE_B10D	CHE_APP_10_B	Bombus terrestris	Switzerland	Apple	47.53528	43.56	289.338	48.228	10.319	1.47	14.32	9.35	Acibenzolar-S-methyl	Cyprodinil	Copper Oxychloride	Dithianon	Acetamiprid	Difenoconazole	Sulphur	Penconazole	NA	NA	NA	NA	NA	NA	NA	NA	NA	NA	NA	NA	NA	NA	NA	NA	NA	NA	NA	NA
CHE_B10E	CHE_APP_10_B	Bombus terrestris	Switzerland	Apple	47.53528	43.56	289.338	48.228	10.319	1.47	14.32	10.40	Acibenzolar-S-methyl	Cyprodinil	Copper Oxychloride	Dithianon	Acetamiprid	Difenoconazole	Sulphur	Penconazole	NA	NA	NA	NA	NA	NA	NA	NA	NA	NA	NA	NA	NA	NA	NA	NA	NA	NA	NA	NA
CHE_B11A	CHE_APP_11_B	Bombus terrestris	Switzerland	Apple	47.43467	24.39	181.194	28.134	7.851	1.394	14.19	3.28	Captan	Dithianon	Folpet	Mepanipyrim	Glyphosate	Difenoconazole	Sulphur	Laminarin	NA	NA	NA	NA	NA	NA	NA	NA	NA	NA	NA	NA	NA	NA	NA	NA	NA	NA	NA	NA
CHE_B11B	CHE_APP_11_B	Bombus terrestris	Switzerland	Apple	47.43467	24.39	181.194	28.134	7.851	1.394	14.19	4.99	Captan	Dithianon	Folpet	Mepanipyrim	Glyphosate	Difenoconazole	Sulphur	Laminarin	NA	NA	NA	NA	NA	NA	NA	NA	NA	NA	NA	NA	NA	NA	NA	NA	NA	NA	NA	NA
CHE_B11C	CHE_APP_11_B	Bombus terrestris	Switzerland	Apple	47.43467	24.39	181.194	28.134	7.851	1.394	14.19	8.73	Captan	Dithianon	Folpet	Mepanipyrim	Glyphosate	Difenoconazole	Sulphur	Laminarin	NA	NA	NA	NA	NA	NA	NA	NA	NA	NA	NA	NA	NA	NA	NA	NA	NA	NA	NA	NA
CHE_B11D	CHE_APP_11_B	Bombus terrestris	Switzerland	Apple	47.43467	24.39	181.194	28.134	7.851	1.394	14.19	4.89	Captan	Dithianon	Folpet	Mepanipyrim	Glyphosate	Difenoconazole	Sulphur	Laminarin	NA	NA	NA	NA	NA	NA	NA	NA	NA	NA	NA	NA	NA	NA	NA	NA	NA	NA	NA	NA
CHE_B11E	CHE_APP_11_B	Bombus terrestris	Switzerland	Apple	47.43467	24.39	181.194	28.134	7.851	1.394	14.19	3.94	Captan	Dithianon	Folpet	Mepanipyrim	Glyphosate	Difenoconazole	Sulphur	Laminarin	NA	NA	NA	NA	NA	NA	NA	NA	NA	NA	NA	NA	NA	NA	NA	NA	NA	NA	NA	NA
CHE_B12A	CHE_APP_12_B	Bombus terrestris	Switzerland	Apple	47.55152	56.89	235.565	15.937	7.276	1.128	50.24	10.27	Thiamethoxam	Dithianon	Pyrimethanil	Folpet	Horsetail Extract	Sulfuric Acid	Difenoconazole	Penconazole	Cyprodinil	Paraffin oil	NA	NA	NA	NA	NA	NA	NA	NA	NA	NA	NA	NA	NA	NA	NA	NA	NA	NA
CHE_B12B	CHE_APP_12_B	Bombus terrestris	Switzerland	Apple	47.55152	56.89	235.565	15.937	7.276	1.128	50.24	10.29	Thiamethoxam	Dithianon	Pyrimethanil	Folpet	Horsetail Extract	Sulfuric Acid	Difenoconazole	Penconazole	Cyprodinil	Paraffin oil	NA	NA	NA	NA	NA	NA	NA	NA	NA	NA	NA	NA	NA	NA	NA	NA	NA	NA
CHE_B12C	CHE_APP_12_B	Bombus terrestris	Switzerland	Apple	47.55152	56.89	235.565	15.937	7.276	1.128	50.24	8.77	Thiamethoxam	Dithianon	Pyrimethanil	Folpet	Horsetail Extract	Sulfuric Acid	Difenoconazole	Penconazole	Cyprodinil	Paraffin oil	NA	NA	NA	NA	NA	NA	NA	NA	NA	NA	NA	NA	NA	NA	NA	NA	NA	NA
CHE_B12D	CHE_APP_12_B	Bombus terrestris	Switzerland	Apple	47.55152	56.89	235.565	15.937	7.276	1.128	50.24	10.46	Thiamethoxam	Dithianon	Pyrimethanil	Folpet	Horsetail Extract	Sulfuric Acid	Difenoconazole	Penconazole	Cyprodinil	Paraffin oil	NA	NA	NA	NA	NA	NA	NA	NA	NA	NA	NA	NA	NA	NA	NA	NA	NA	NA
CHE_B12E	CHE_APP_12_B	Bombus terrestris	Switzerland	Apple	47.55152	56.89	235.565	15.937	7.276	1.128	50.24	10.90	Thiamethoxam	Dithianon	Pyrimethanil	Folpet	Horsetail Extract	Sulfuric Acid	Difenoconazole	Penconazole	Cyprodinil	Paraffin oil	NA	NA	NA	NA	NA	NA	NA	NA	NA	NA	NA	NA	NA	NA	NA	NA	NA	NA
CHE_B13A	CHE_APP_13_B	Bombus terrestris	Switzerland	Apple	47.53289	41.21	315.275	71.123	15.858	1.439	149.7	10.73	Copper oxychloride	Copper hydroxide	Calcium polysulfide	Horsetail Extract	Sulfuric Acid	Azadirachtin	Sulphur	Potassium Bicarbonate	NA	NA	NA	NA	NA	NA	NA	NA	NA	NA	NA	NA	NA	NA	NA	NA	NA	NA	NA	NA
CHE_B13B	CHE_APP_13_B	Bombus terrestris	Switzerland	Apple	47.53289	41.21	315.275	71.123	15.858	1.439	149.7	9.04	Copper oxychloride	Copper hydroxide	Calcium polysulfide	Horsetail Extract	Sulfuric Acid	Azadirachtin	Sulphur	Potassium Bicarbonate	NA	NA	NA	NA	NA	NA	NA	NA	NA	NA	NA	NA	NA	NA	NA	NA	NA	NA	NA	NA
CHE_B13C	CHE_APP_13_B	Bombus terrestris	Switzerland	Apple	47.53289	41.21	315.275	71.123	15.858	1.439	149.7	9.76	Copper oxychloride	Copper hydroxide	Calcium polysulfide	Horsetail Extract	Sulfuric Acid	Azadirachtin	Sulphur	Potassium Bicarbonate	NA	NA	NA	NA	NA	NA	NA	NA	NA	NA	NA	NA	NA	NA	NA	NA	NA	NA	NA	NA
CHE_B13D	CHE_APP_13_B	Bombus terrestris	Switzerland	Apple	47.53289	41.21	315.275	71.123	15.858	1.439	149.7	10.09	Copper oxychloride	Copper hydroxide	Calcium polysulfide	Horsetail Extract	Sulfuric Acid	Azadirachtin	Sulphur	Potassium Bicarbonate	NA	NA	NA	NA	NA	NA	NA	NA	NA	NA	NA	NA	NA	NA	NA	NA	NA	NA	NA	NA
CHE_B13E	CHE_APP_13_B	Bombus terrestris	Switzerland	Apple	47.53289	41.21	315.275	71.123	15.858	1.439	149.7	9.20	Copper oxychloride	Copper hydroxide	Calcium polysulfide	Horsetail Extract	Sulfuric Acid	Azadirachtin	Sulphur	Potassium Bicarbonate	NA	NA	NA	NA	NA	NA	NA	NA	NA	NA	NA	NA	NA	NA	NA	NA	NA	NA	NA	NA
CHE_B14A	CHE_APP_14_B	Bombus terrestris	Switzerland	Apple	47.60911	43.94	257.003	106.993	21.253	1.617	16.35	7.30	Thiophanate-methyl	Cyprodinil	Dithianon	Sulphur	Difenoconazole	NA	NA	NA	NA	NA	NA	NA	NA	NA	NA	NA	NA	NA	NA	NA	NA	NA	NA	NA	NA	NA	NA	NA
CHE_B14B	CHE_APP_14_B	Bombus terrestris	Switzerland	Apple	47.60911	43.94	257.003	106.993	21.253	1.617	16.35	9.06	Thiophanate-methyl	Cyprodinil	Dithianon	Sulphur	Difenoconazole	NA	NA	NA	NA	NA	NA	NA	NA	NA	NA	NA	NA	NA	NA	NA	NA	NA	NA	NA	NA	NA	NA	NA
CHE_B14C	CHE_APP_14_B	Bombus terrestris	Switzerland	Apple	47.60911	43.94	257.003	106.993	21.253	1.617	16.35	6.29	Thiophanate-methyl	Cyprodinil	Dithianon	Sulphur	Difenoconazole	NA	NA	NA	NA	NA	NA	NA	NA	NA	NA	NA	NA	NA	NA	NA	NA	NA	NA	NA	NA	NA	NA	NA
CHE_B14D	CHE_APP_14_B	Bombus terrestris	Switzerland	Apple	47.60911	43.94	257.003	106.993	21.253	1.617	16.35	7.42	Thiophanate-methyl	Cyprodinil	Dithianon	Sulphur	Difenoconazole	NA	NA	NA	NA	NA	NA	NA	NA	NA	NA	NA	NA	NA	NA	NA	NA	NA	NA	NA	NA	NA	NA	NA
CHE_B14E	CHE_APP_14_B	Bombus terrestris	Switzerland	Apple	47.60911	43.94	257.003	106.993	21.253	1.617	16.35	9.17	Thiophanate-methyl	Cyprodinil	Dithianon	Sulphur	Difenoconazole	NA	NA	NA	NA	NA	NA	NA	NA	NA	NA	NA	NA	NA	NA	NA	NA	NA	NA	NA	NA	NA	NA	NA
CHE_B15A	CHE_APP_15_B	Bombus terrestris	Switzerland	Apple	47.63127	55.65	249.725	77.758	19.178	1.535	34.4	5.64	Captan	Sulphur	Fluxapyroxad	Myclobutanil	Copper oxychloride	Paraffin oil	NA	NA	NA	NA	NA	NA	NA	NA	NA	NA	NA	NA	NA	NA	NA	NA	NA	NA	NA	NA	NA	NA
CHE_B15B	CHE_APP_15_B	Bombus terrestris	Switzerland	Apple	47.63127	55.65	249.725	77.758	19.178	1.535	34.4	7.74	Captan	Sulphur	Fluxapyroxad	Myclobutanil	Copper oxychloride	Paraffin oil	NA	NA	NA	NA	NA	NA	NA	NA	NA	NA	NA	NA	NA	NA	NA	NA	NA	NA	NA	NA	NA	NA
CHE_B15C	CHE_APP_15_B	Bombus terrestris	Switzerland	Apple	47.63127	55.65	249.725	77.758	19.178	1.535	34.4	11.31	Captan	Sulphur	Fluxapyroxad	Myclobutanil	Copper oxychloride	Paraffin oil	NA	NA	NA	NA	NA	NA	NA	NA	NA	NA	NA	NA	NA	NA	NA	NA	NA	NA	NA	NA	NA	NA
CHE_B15D	CHE_APP_15_B	Bombus terrestris	Switzerland	Apple	47.63127	55.65	249.725	77.758	19.178	1.535	34.4	10.98	Captan	Sulphur	Fluxapyroxad	Myclobutanil	Copper oxychloride	Paraffin oil	NA	NA	NA	NA	NA	NA	NA	NA	NA	NA	NA	NA	NA	NA	NA	NA	NA	NA	NA	NA	NA	NA
CHE_B15E	CHE_APP_15_B	Bombus terrestris	Switzerland	Apple	47.63127	55.65	249.725	77.758	19.178	1.535	34.4	9.09	Captan	Sulphur	Fluxapyroxad	Myclobutanil	Copper oxychloride	Paraffin oil	NA	NA	NA	NA	NA	NA	NA	NA	NA	NA	NA	NA	NA	NA	NA	NA	NA	NA	NA	NA	NA	NA
CHE_B16A	CHE_APP_16_B	Bombus terrestris	Switzerland	Apple	47.48491	26.27	314.782	149.727	6.763	1.544	NA	10.86	NA	NA	NA	NA	NA	NA	NA	NA	NA	NA	NA	NA	NA	NA	NA	NA	NA	NA	NA	NA	NA	NA	NA	NA	NA	NA	NA	NA
CHE_B16B	CHE_APP_16_B	Bombus terrestris	Switzerland	Apple	47.48491	26.27	314.782	149.727	6.763	1.544	NA	6.28	NA	NA	NA	NA	NA	NA	NA	NA	NA	NA	NA	NA	NA	NA	NA	NA	NA	NA	NA	NA	NA	NA	NA	NA	NA	NA	NA	NA
CHE_B16C	CHE_APP_16_B	Bombus terrestris	Switzerland	Apple	47.48491	26.27	314.782	149.727	6.763	1.544	NA	5.89	NA	NA	NA	NA	NA	NA	NA	NA	NA	NA	NA	NA	NA	NA	NA	NA	NA	NA	NA	NA	NA	NA	NA	NA	NA	NA	NA	NA
CHE_B16D	CHE_APP_16_B	Bombus terrestris	Switzerland	Apple	47.48491	26.27	314.782	149.727	6.763	1.544	NA	7.00	NA	NA	NA	NA	NA	NA	NA	NA	NA	NA	NA	NA	NA	NA	NA	NA	NA	NA	NA	NA	NA	NA	NA	NA	NA	NA	NA	NA
CHE_B16E	CHE_APP_16_B	Bombus terrestris	Switzerland	Apple	47.48491	26.27	314.782	149.727	6.763	1.544	NA	10.28	NA	NA	NA	NA	NA	NA	NA	NA	NA	NA	NA	NA	NA	NA	NA	NA	NA	NA	NA	NA	NA	NA	NA	NA	NA	NA	NA	NA
GBR_AP1A	GBR_OSR_01_A	Apis mellifera	United Kingdom	Oilseed rape	51.49315	49.32	313.72	78.051	7.756	1.307	12.58	6.02	Aminopyralid	Propyzamide	Clomazone	Clethodim	Lambda-cyhalothrin	Prothioconazole	Glyphosate	Propaquizafop	Metazachlor	NA	NA	NA	NA	NA	NA	NA	NA	NA	NA	NA	NA	NA	NA	NA	NA	NA	NA	NA
GBR_AP1B	GBR_OSR_01_A	Apis mellifera	United Kingdom	Oilseed rape	51.49315	49.32	313.72	78.051	7.756	1.307	12.58	2.81	Aminopyralid	Propyzamide	Clomazone	Clethodim	Lambda-cyhalothrin	Prothioconazole	Glyphosate	Propaquizafop	Metazachlor	NA	NA	NA	NA	NA	NA	NA	NA	NA	NA	NA	NA	NA	NA	NA	NA	NA	NA	NA
GBR_AP1C	GBR_OSR_01_A	Apis mellifera	United Kingdom	Oilseed rape	51.49315	49.32	313.72	78.051	7.756	1.307	12.58	4.77	Aminopyralid	Propyzamide	Clomazone	Clethodim	Lambda-cyhalothrin	Prothioconazole	Glyphosate	Propaquizafop	Metazachlor	NA	NA	NA	NA	NA	NA	NA	NA	NA	NA	NA	NA	NA	NA	NA	NA	NA	NA	NA
GBR_AP1D	GBR_OSR_01_A	Apis mellifera	United Kingdom	Oilseed rape	51.49315	49.32	313.72	78.051	7.756	1.307	12.58	2.23	Aminopyralid	Propyzamide	Clomazone	Clethodim	Lambda-cyhalothrin	Prothioconazole	Glyphosate	Propaquizafop	Metazachlor	NA	NA	NA	NA	NA	NA	NA	NA	NA	NA	NA	NA	NA	NA	NA	NA	NA	NA	NA
GBR_AP1E	GBR_OSR_01_A	Apis mellifera	United Kingdom	Oilseed rape	51.49315	49.32	313.72	78.051	7.756	1.307	12.58	2.74	Aminopyralid	Propyzamide	Clomazone	Clethodim	Lambda-cyhalothrin	Prothioconazole	Glyphosate	Propaquizafop	Metazachlor	NA	NA	NA	NA	NA	NA	NA	NA	NA	NA	NA	NA	NA	NA	NA	NA	NA	NA	NA
GBR_AP2A	GBR_OSR_02_A	Apis mellifera	United Kingdom	Oilseed rape	51.63219	46.6	330.145	93.205	2.981	1.285	19.399	6.71	Azoxystrobin	Imazamox	Metazachlor	Deltamethrin	Clopyralid	Picloram	Metaldehyde	Lambda-cyhalothrin	Propyzamide	Difenoconazole	Prothioconazole	Ferric phosphate	Ferric phosphate (anhydrous)	Glyphosate	NA	NA	NA	NA	NA	NA	NA	NA	NA	NA	NA	NA	NA	NA
GBR_AP2B	GBR_OSR_02_A	Apis mellifera	United Kingdom	Oilseed rape	51.63219	46.6	330.145	93.205	2.981	1.285	19.399	4.85	Azoxystrobin	Imazamox	Metazachlor	Deltamethrin	Clopyralid	Picloram	Metaldehyde	Lambda-cyhalothrin	Propyzamide	Difenoconazole	Prothioconazole	Ferric phosphate	Ferric phosphate (anhydrous)	Glyphosate	NA	NA	NA	NA	NA	NA	NA	NA	NA	NA	NA	NA	NA	NA
GBR_AP2C	GBR_OSR_02_A	Apis mellifera	United Kingdom	Oilseed rape	51.63219	46.6	330.145	93.205	2.981	1.285	19.399	9.41	Azoxystrobin	Imazamox	Metazachlor	Deltamethrin	Clopyralid	Picloram	Metaldehyde	Lambda-cyhalothrin	Propyzamide	Difenoconazole	Prothioconazole	Ferric phosphate	Ferric phosphate (anhydrous)	Glyphosate	NA	NA	NA	NA	NA	NA	NA	NA	NA	NA	NA	NA	NA	NA
GBR_AP2D	GBR_OSR_02_A	Apis mellifera	United Kingdom	Oilseed rape	51.63219	46.6	330.145	93.205	2.981	1.285	19.399	7.06	Azoxystrobin	Imazamox	Metazachlor	Deltamethrin	Clopyralid	Picloram	Metaldehyde	Lambda-cyhalothrin	Propyzamide	Difenoconazole	Prothioconazole	Ferric phosphate	Ferric phosphate (anhydrous)	Glyphosate	NA	NA	NA	NA	NA	NA	NA	NA	NA	NA	NA	NA	NA	NA
GBR_AP2E	GBR_OSR_02_A	Apis mellifera	United Kingdom	Oilseed rape	51.63219	46.6	330.145	93.205	2.981	1.285	19.399	6.07	Azoxystrobin	Imazamox	Metazachlor	Deltamethrin	Clopyralid	Picloram	Metaldehyde	Lambda-cyhalothrin	Propyzamide	Difenoconazole	Prothioconazole	Ferric phosphate	Ferric phosphate (anhydrous)	Glyphosate	NA	NA	NA	NA	NA	NA	NA	NA	NA	NA	NA	NA	NA	NA
GBR_A3A	GBR_OSR_03_A	Apis mellifera	United Kingdom	Oilseed rape	51.55058	75.37	201.505	42.421	0.944	0.792	5	1.36	Aminopyralid	Propyzamide	Cypermethrin	Propaquizafop	Prothioconazole	Metazachlor	Tebuconazole	Thiophanate-methyl	NA	NA	NA	NA	NA	NA	NA	NA	NA	NA	NA	NA	NA	NA	NA	NA	NA	NA	NA	NA
GBR_AP3B	GBR_OSR_03_A	Apis mellifera	United Kingdom	Oilseed rape	51.55058	75.37	201.505	42.421	0.944	0.792	5	2.72	Aminopyralid	Propyzamide	Cypermethrin	Propaquizafop	Prothioconazole	Metazachlor	Tebuconazole	Thiophanate-methyl	NA	NA	NA	NA	NA	NA	NA	NA	NA	NA	NA	NA	NA	NA	NA	NA	NA	NA	NA	NA
GBR_AP3C	GBR_OSR_03_A	Apis mellifera	United Kingdom	Oilseed rape	51.55058	75.37	201.505	42.421	0.944	0.792	5	2.95	Aminopyralid	Propyzamide	Cypermethrin	Propaquizafop	Prothioconazole	Metazachlor	Tebuconazole	Thiophanate-methyl	NA	NA	NA	NA	NA	NA	NA	NA	NA	NA	NA	NA	NA	NA	NA	NA	NA	NA	NA	NA
GBR_AP3D	GBR_OSR_03_A	Apis mellifera	United Kingdom	Oilseed rape	51.55058	75.37	201.505	42.421	0.944	0.792	5	5.04	Aminopyralid	Propyzamide	Cypermethrin	Propaquizafop	Prothioconazole	Metazachlor	Tebuconazole	Thiophanate-methyl	NA	NA	NA	NA	NA	NA	NA	NA	NA	NA	NA	NA	NA	NA	NA	NA	NA	NA	NA	NA
GBR_AP3E	GBR_OSR_03_A	Apis mellifera	United Kingdom	Oilseed rape	51.55058	75.37	201.505	42.421	0.944	0.792	5	2.47	Aminopyralid	Propyzamide	Cypermethrin	Propaquizafop	Prothioconazole	Metazachlor	Tebuconazole	Thiophanate-methyl	NA	NA	NA	NA	NA	NA	NA	NA	NA	NA	NA	NA	NA	NA	NA	NA	NA	NA	NA	NA
GBR_AP4A	GBR_OSR_04_A	Apis mellifera	United Kingdom	Oilseed rape	51.10779	70.11	304.123	42.398	2.494	0.928	10.644	3.19	Aminopyralid	Propyzamide	Azoxystrobin	Propaquizafop	Lambda-cyhalothrin	Glyphosate	Difenoconazole	Metazachlor	Tebuconazole	Tau-fluvalinate	NA	NA	NA	NA	NA	NA	NA	NA	NA	NA	NA	NA	NA	NA	NA	NA	NA	NA
GBR_AP4B	GBR_OSR_04_A	Apis mellifera	United Kingdom	Oilseed rape	51.10779	70.11	304.123	42.398	2.494	0.928	10.644	2.78	Aminopyralid	Propyzamide	Azoxystrobin	Propaquizafop	Lambda-cyhalothrin	Glyphosate	Difenoconazole	Metazachlor	Tebuconazole	Tau-fluvalinate	NA	NA	NA	NA	NA	NA	NA	NA	NA	NA	NA	NA	NA	NA	NA	NA	NA	NA
GBR_AP4C	GBR_OSR_04_A	Apis mellifera	United Kingdom	Oilseed rape	51.10779	70.11	304.123	42.398	2.494	0.928	10.644	4.07	Aminopyralid	Propyzamide	Azoxystrobin	Propaquizafop	Lambda-cyhalothrin	Glyphosate	Difenoconazole	Metazachlor	Tebuconazole	Tau-fluvalinate	NA	NA	NA	NA	NA	NA	NA	NA	NA	NA	NA	NA	NA	NA	NA	NA	NA	NA
GBR_AP4D	GBR_OSR_04_A	Apis mellifera	United Kingdom	Oilseed rape	51.10779	70.11	304.123	42.398	2.494	0.928	10.644	3.59	Aminopyralid	Propyzamide	Azoxystrobin	Propaquizafop	Lambda-cyhalothrin	Glyphosate	Difenoconazole	Metazachlor	Tebuconazole	Tau-fluvalinate	NA	NA	NA	NA	NA	NA	NA	NA	NA	NA	NA	NA	NA	NA	NA	NA	NA	NA
GBR_AP4E	GBR_OSR_04_A	Apis mellifera	United Kingdom	Oilseed rape	51.10779	70.11	304.123	42.398	2.494	0.928	10.644	2.63	Aminopyralid	Propyzamide	Azoxystrobin	Propaquizafop	Lambda-cyhalothrin	Glyphosate	Difenoconazole	Metazachlor	Tebuconazole	Tau-fluvalinate	NA	NA	NA	NA	NA	NA	NA	NA	NA	NA	NA	NA	NA	NA	NA	NA	NA	NA
GBR_AP5A	GBR_OSR_05_A	Apis mellifera	United Kingdom	Oilseed rape	51.47556	65.88	323.399	61.884	9.217	1.028	NA	5.79	NA	NA	NA	NA	NA	NA	NA	NA	NA	NA	NA	NA	NA	NA	NA	NA	NA	NA	NA	NA	NA	NA	NA	NA	NA	NA	NA	NA
GBR_AP5B	GBR_OSR_05_A	Apis mellifera	United Kingdom	Oilseed rape	51.47556	65.88	323.399	61.884	9.217	1.028	NA	4.35	NA	NA	NA	NA	NA	NA	NA	NA	NA	NA	NA	NA	NA	NA	NA	NA	NA	NA	NA	NA	NA	NA	NA	NA	NA	NA	NA	NA
GBR_AP5C	GBR_OSR_05_A	Apis mellifera	United Kingdom	Oilseed rape	51.47556	65.88	323.399	61.884	9.217	1.028	NA	3.42	NA	NA	NA	NA	NA	NA	NA	NA	NA	NA	NA	NA	NA	NA	NA	NA	NA	NA	NA	NA	NA	NA	NA	NA	NA	NA	NA	NA
GBR_AP5D	GBR_OSR_05_A	Apis mellifera	United Kingdom	Oilseed rape	51.47556	65.88	323.399	61.884	9.217	1.028	NA	3.53	NA	NA	NA	NA	NA	NA	NA	NA	NA	NA	NA	NA	NA	NA	NA	NA	NA	NA	NA	NA	NA	NA	NA	NA	NA	NA	NA	NA
GBR_AP5E	GBR_OSR_05_A	Apis mellifera	United Kingdom	Oilseed rape	51.47556	65.88	323.399	61.884	9.217	1.028	NA	6.98	NA	NA	NA	NA	NA	NA	NA	NA	NA	NA	NA	NA	NA	NA	NA	NA	NA	NA	NA	NA	NA	NA	NA	NA	NA	NA	NA	NA
GBR_AP6A	GBR_OSR_06_A	Apis mellifera	United Kingdom	Oilseed rape	51.22111	79.86	197.094	30.712	2.19	0.716	17.03	15.90	Aminopyralid	Propyzamide	Glyphosate	Clomazone	Prothioconazole	Ferric phosphate	Ferric phosphate (anhydrous)	NA	NA	NA	NA	NA	NA	NA	NA	NA	NA	NA	NA	NA	NA	NA	NA	NA	NA	NA	NA	NA
GBR_AP6B	GBR_OSR_06_A	Apis mellifera	United Kingdom	Oilseed rape	51.22111	79.86	197.094	30.712	2.19	0.716	17.03	11.36	Aminopyralid	Propyzamide	Glyphosate	Clomazone	Prothioconazole	Ferric phosphate	Ferric phosphate (anhydrous)	NA	NA	NA	NA	NA	NA	NA	NA	NA	NA	NA	NA	NA	NA	NA	NA	NA	NA	NA	NA	NA
GBR_AP6C	GBR_OSR_06_A	Apis mellifera	United Kingdom	Oilseed rape	51.22111	79.86	197.094	30.712	2.19	0.716	17.03	22.12	Aminopyralid	Propyzamide	Glyphosate	Clomazone	Prothioconazole	Ferric phosphate	Ferric phosphate (anhydrous)	NA	NA	NA	NA	NA	NA	NA	NA	NA	NA	NA	NA	NA	NA	NA	NA	NA	NA	NA	NA	NA
GBR_AP6D	GBR_OSR_06_A	Apis mellifera	United Kingdom	Oilseed rape	51.22111	79.86	197.094	30.712	2.19	0.716	17.03	10.92	Aminopyralid	Propyzamide	Glyphosate	Clomazone	Prothioconazole	Ferric phosphate	Ferric phosphate (anhydrous)	NA	NA	NA	NA	NA	NA	NA	NA	NA	NA	NA	NA	NA	NA	NA	NA	NA	NA	NA	NA	NA
GBR_AP6E	GBR_OSR_06_A	Apis mellifera	United Kingdom	Oilseed rape	51.22111	79.86	197.094	30.712	2.19	0.716	17.03	23.25	Aminopyralid	Propyzamide	Glyphosate	Clomazone	Prothioconazole	Ferric phosphate	Ferric phosphate (anhydrous)	NA	NA	NA	NA	NA	NA	NA	NA	NA	NA	NA	NA	NA	NA	NA	NA	NA	NA	NA	NA	NA
GBR_AP7A	GBR_OSR_07_A	Apis mellifera	United Kingdom	Oilseed rape	51.35413	38.23	438.45	108.781	3.333	1.34	8.35	10.39	Aminopyralid	Propyzamide	Clomazone	Clethodim	Glyphosate	Difenoconazole	NA	NA	NA	NA	NA	NA	NA	NA	NA	NA	NA	NA	NA	NA	NA	NA	NA	NA	NA	NA	NA	NA
GBR_AP7B	GBR_OSR_07_A	Apis mellifera	United Kingdom	Oilseed rape	51.35413	38.23	438.45	108.781	3.333	1.34	8.35	18.47	Aminopyralid	Propyzamide	Clomazone	Clethodim	Glyphosate	Difenoconazole	NA	NA	NA	NA	NA	NA	NA	NA	NA	NA	NA	NA	NA	NA	NA	NA	NA	NA	NA	NA	NA	NA
GBR_AP7C	GBR_OSR_07_A	Apis mellifera	United Kingdom	Oilseed rape	51.35413	38.23	438.45	108.781	3.333	1.34	8.35	11.16	Aminopyralid	Propyzamide	Clomazone	Clethodim	Glyphosate	Difenoconazole	NA	NA	NA	NA	NA	NA	NA	NA	NA	NA	NA	NA	NA	NA	NA	NA	NA	NA	NA	NA	NA	NA
GBR_AP7D	GBR_OSR_07_A	Apis mellifera	United Kingdom	Oilseed rape	51.35413	38.23	438.45	108.781	3.333	1.34	8.35	14.15	Aminopyralid	Propyzamide	Clomazone	Clethodim	Glyphosate	Difenoconazole	NA	NA	NA	NA	NA	NA	NA	NA	NA	NA	NA	NA	NA	NA	NA	NA	NA	NA	NA	NA	NA	NA
GBR_AP7E	GBR_OSR_07_A	Apis mellifera	United Kingdom	Oilseed rape	51.35413	38.23	438.45	108.781	3.333	1.34	8.35	13.61	Aminopyralid	Propyzamide	Clomazone	Clethodim	Glyphosate	Difenoconazole	NA	NA	NA	NA	NA	NA	NA	NA	NA	NA	NA	NA	NA	NA	NA	NA	NA	NA	NA	NA	NA	NA
GBR_AP8A	GBR_OSR_08_A	Apis mellifera	United Kingdom	Oilseed rape	51.37269	43.45	516.581	94.521	16.264	1.416	12.921	6.28	Dimethenamid-P	Metazachlor	Quinmerac	Mepiquat-Chloride	Metconazole	Clethodim	Clomazone	Propaquizafop	Glyphosate	Metaldehyde	Lambda-cyhalothrin	Propyzamide	Tau-fluvalinate	Prothioconazole	Tebuconazole	NA	NA	NA	NA	NA	NA	NA	NA	NA	NA	NA	NA	NA
GBR_AP8B	GBR_OSR_08_A	Apis mellifera	United Kingdom	Oilseed rape	51.37269	43.45	516.581	94.521	16.264	1.416	12.921	4.46	Dimethenamid-P	Metazachlor	Quinmerac	Mepiquat-Chloride	Metconazole	Clethodim	Clomazone	Propaquizafop	Glyphosate	Metaldehyde	Lambda-cyhalothrin	Propyzamide	Tau-fluvalinate	Prothioconazole	Tebuconazole	NA	NA	NA	NA	NA	NA	NA	NA	NA	NA	NA	NA	NA
GBR_AP8C	GBR_OSR_08_A	Apis mellifera	United Kingdom	Oilseed rape	51.37269	43.45	516.581	94.521	16.264	1.416	12.921	5.87	Dimethenamid-P	Metazachlor	Quinmerac	Mepiquat-Chloride	Metconazole	Clethodim	Clomazone	Propaquizafop	Glyphosate	Metaldehyde	Lambda-cyhalothrin	Propyzamide	Tau-fluvalinate	Prothioconazole	Tebuconazole	NA	NA	NA	NA	NA	NA	NA	NA	NA	NA	NA	NA	NA
GBR_AP8D	GBR_OSR_08_A	Apis mellifera	United Kingdom	Oilseed rape	51.37269	43.45	516.581	94.521	16.264	1.416	12.921	9.02	Dimethenamid-P	Metazachlor	Quinmerac	Mepiquat-Chloride	Metconazole	Clethodim	Clomazone	Propaquizafop	Glyphosate	Metaldehyde	Lambda-cyhalothrin	Propyzamide	Tau-fluvalinate	Prothioconazole	Tebuconazole	NA	NA	NA	NA	NA	NA	NA	NA	NA	NA	NA	NA	NA
GBR_AP8E	GBR_OSR_08_A	Apis mellifera	United Kingdom	Oilseed rape	51.37269	43.45	516.581	94.521	16.264	1.416	12.921	5.76	Dimethenamid-P	Metazachlor	Quinmerac	Mepiquat-Chloride	Metconazole	Clethodim	Clomazone	Propaquizafop	Glyphosate	Metaldehyde	Lambda-cyhalothrin	Propyzamide	Tau-fluvalinate	Prothioconazole	Tebuconazole	NA	NA	NA	NA	NA	NA	NA	NA	NA	NA	NA	NA	NA
GBR_AP9A	GBR_APP_09_A	Apis mellifera	United Kingdom	Apple	51.10998	25.84	397.756	78.725	4.706	1.421	36.6	4.93	Cydia pomonella granulovirus (CpGV)	Copper Oxychloride	Spinosad	Sulphur	NA	NA	NA	NA	NA	NA	NA	NA	NA	NA	NA	NA	NA	NA	NA	NA	NA	NA	NA	NA	NA	NA	NA	NA
GBR_AP9B	GBR_APP_09_A	Apis mellifera	United Kingdom	Apple	51.10998	25.84	397.756	78.725	4.706	1.421	36.6	5.21	Cydia pomonella granulovirus (CpGV)	Copper Oxychloride	Spinosad	Sulphur	NA	NA	NA	NA	NA	NA	NA	NA	NA	NA	NA	NA	NA	NA	NA	NA	NA	NA	NA	NA	NA	NA	NA	NA
GBR_AP9C	GBR_APP_09_A	Apis mellifera	United Kingdom	Apple	51.10998	25.84	397.756	78.725	4.706	1.421	36.6	4.49	Cydia pomonella granulovirus (CpGV)	Copper Oxychloride	Spinosad	Sulphur	NA	NA	NA	NA	NA	NA	NA	NA	NA	NA	NA	NA	NA	NA	NA	NA	NA	NA	NA	NA	NA	NA	NA	NA
GBR_AP9D	GBR_APP_09_A	Apis mellifera	United Kingdom	Apple	51.10998	25.84	397.756	78.725	4.706	1.421	36.6	8.14	Cydia pomonella granulovirus (CpGV)	Copper Oxychloride	Spinosad	Sulphur	NA	NA	NA	NA	NA	NA	NA	NA	NA	NA	NA	NA	NA	NA	NA	NA	NA	NA	NA	NA	NA	NA	NA	NA
GBR_AP9E	GBR_APP_09_A	Apis mellifera	United Kingdom	Apple	51.10998	25.84	397.756	78.725	4.706	1.421	36.6	9.27	Cydia pomonella granulovirus (CpGV)	Copper Oxychloride	Spinosad	Sulphur	NA	NA	NA	NA	NA	NA	NA	NA	NA	NA	NA	NA	NA	NA	NA	NA	NA	NA	NA	NA	NA	NA	NA	NA
GBR_AP10A	GBR_APP_10_A	Apis mellifera	United Kingdom	Apple	51.29911	65.68	339.325	66.952	6.658	1.488	180.48	4.68	Cydia pomonella granulovirus (CpGV)	Bacillus thuringiensis kurstaki ABTS-351	Copper	Sulphur	Spinosad	NA	NA	NA	NA	NA	NA	NA	NA	NA	NA	NA	NA	NA	NA	NA	NA	NA	NA	NA	NA	NA	NA	NA
GBR_AP10B	GBR_APP_10_A	Apis mellifera	United Kingdom	Apple	51.29911	65.68	339.325	66.952	6.658	1.488	180.48	5.90	Cydia pomonella granulovirus (CpGV)	Bacillus thuringiensis kurstaki ABTS-351	Copper	Sulphur	Spinosad	NA	NA	NA	NA	NA	NA	NA	NA	NA	NA	NA	NA	NA	NA	NA	NA	NA	NA	NA	NA	NA	NA	NA
GBR_AP10C	GBR_APP_10_A	Apis mellifera	United Kingdom	Apple	51.29911	65.68	339.325	66.952	6.658	1.488	180.48	5.84	Cydia pomonella granulovirus (CpGV)	Bacillus thuringiensis kurstaki ABTS-351	Copper	Sulphur	Spinosad	NA	NA	NA	NA	NA	NA	NA	NA	NA	NA	NA	NA	NA	NA	NA	NA	NA	NA	NA	NA	NA	NA	NA
GBR_AP10D	GBR_APP_10_A	Apis mellifera	United Kingdom	Apple	51.29911	65.68	339.325	66.952	6.658	1.488	180.48	6.81	Cydia pomonella granulovirus (CpGV)	Bacillus thuringiensis kurstaki ABTS-351	Copper	Sulphur	Spinosad	NA	NA	NA	NA	NA	NA	NA	NA	NA	NA	NA	NA	NA	NA	NA	NA	NA	NA	NA	NA	NA	NA	NA
GBR_AP10E	GBR_APP_10_A	Apis mellifera	United Kingdom	Apple	51.29911	65.68	339.325	66.952	6.658	1.488	180.48	6.69	Cydia pomonella granulovirus (CpGV)	Bacillus thuringiensis kurstaki ABTS-351	Copper	Sulphur	Spinosad	NA	NA	NA	NA	NA	NA	NA	NA	NA	NA	NA	NA	NA	NA	NA	NA	NA	NA	NA	NA	NA	NA	NA
GBR_AP11A	GBR_APP_11_A	Apis mellifera	United Kingdom	Apple	51.38737	53.52	487.675	75.349	14.07	1.599	21.27	4.69	Dithianon	Propyzamide	Copper Oxychloride	2,4-D	Penthiopyrad	Acetamiprid	Glyphosate	Captan	Pyrimethanil	Methoxyfenozide	Fluxapyroxad	Dodine	NA	NA	NA	NA	NA	NA	NA	NA	NA	NA	NA	NA	NA	NA	NA	NA
GBR_AP11B	GBR_APP_11_A	Apis mellifera	United Kingdom	Apple	51.38737	53.52	487.675	75.349	14.07	1.599	21.27	7.04	Dithianon	Propyzamide	Copper Oxychloride	2,4-D	Penthiopyrad	Acetamiprid	Glyphosate	Captan	Pyrimethanil	Methoxyfenozide	Fluxapyroxad	Dodine	NA	NA	NA	NA	NA	NA	NA	NA	NA	NA	NA	NA	NA	NA	NA	NA
GBR_AP11C	GBR_APP_11_A	Apis mellifera	United Kingdom	Apple	51.38737	53.52	487.675	75.349	14.07	1.599	21.27	6.23	Dithianon	Propyzamide	Copper Oxychloride	2,4-D	Penthiopyrad	Acetamiprid	Glyphosate	Captan	Pyrimethanil	Methoxyfenozide	Fluxapyroxad	Dodine	NA	NA	NA	NA	NA	NA	NA	NA	NA	NA	NA	NA	NA	NA	NA	NA
GBR_AP11D	GBR_APP_11_A	Apis mellifera	United Kingdom	Apple	51.38737	53.52	487.675	75.349	14.07	1.599	21.27	8.85	Dithianon	Propyzamide	Copper Oxychloride	2,4-D	Penthiopyrad	Acetamiprid	Glyphosate	Captan	Pyrimethanil	Methoxyfenozide	Fluxapyroxad	Dodine	NA	NA	NA	NA	NA	NA	NA	NA	NA	NA	NA	NA	NA	NA	NA	NA
GBR_AP11E	GBR_APP_11_A	Apis mellifera	United Kingdom	Apple	51.38737	53.52	487.675	75.349	14.07	1.599	21.27	4.10	Dithianon	Propyzamide	Copper Oxychloride	2,4-D	Penthiopyrad	Acetamiprid	Glyphosate	Captan	Pyrimethanil	Methoxyfenozide	Fluxapyroxad	Dodine	NA	NA	NA	NA	NA	NA	NA	NA	NA	NA	NA	NA	NA	NA	NA	NA
GBR_AP12A	GBR_APP_12_A	Apis mellifera	United Kingdom	Apple	51.18590	47.10	474.394	76.831	11.994	1.716	56.96	8.92	Dithianon	Spirotetramat	Boscalid	Pyraclostrobin	Thiacloprid	Acetamiprid	Chlorantraniliprole	Cyflufenamid	Potassium Phosphonates	Difenoconazole	Clopyralid	1-naphthylacetic acid	Trifloxystrobin	Penthiopyrad	2,4-D	Glyphosate	Fluopyram	Mancozeb	Captan	Pyrimethanil	Methoxyfenozide	Fluxapyroxad	Fluroxypyr	Indoxacarb	Kresoxim methyl	Dodine	Proquinazid	Penconazole
GBR_AP12B	GBR_APP_12_A	Apis mellifera	United Kingdom	Apple	51.18590	47.10	474.394	76.831	11.994	1.716	56.96	5.30	Dithianon	Spirotetramat	Boscalid	Pyraclostrobin	Thiacloprid	Acetamiprid	Chlorantraniliprole	Cyflufenamid	Potassium Phosphonates	Difenoconazole	Clopyralid	1-naphthylacetic acid	Trifloxystrobin	Penthiopyrad	2,4-D	Glyphosate	Fluopyram	Mancozeb	Captan	Pyrimethanil	Methoxyfenozide	Fluxapyroxad	Fluroxypyr	Indoxacarb	Kresoxim methyl	Dodine	Proquinazid	Penconazole
GBR_AP12C	GBR_APP_12_A	Apis mellifera	United Kingdom	Apple	51.18590	47.10	474.394	76.831	11.994	1.716	56.96	8.06	Dithianon	Spirotetramat	Boscalid	Pyraclostrobin	Thiacloprid	Acetamiprid	Chlorantraniliprole	Cyflufenamid	Potassium Phosphonates	Difenoconazole	Clopyralid	1-naphthylacetic acid	Trifloxystrobin	Penthiopyrad	2,4-D	Glyphosate	Fluopyram	Mancozeb	Captan	Pyrimethanil	Methoxyfenozide	Fluxapyroxad	Fluroxypyr	Indoxacarb	Kresoxim methyl	Dodine	Proquinazid	Penconazole
GBR_AP12D	GBR_APP_12_A	Apis mellifera	United Kingdom	Apple	51.18590	47.10	474.394	76.831	11.994	1.716	56.96	8.33	Dithianon	Spirotetramat	Boscalid	Pyraclostrobin	Thiacloprid	Acetamiprid	Chlorantraniliprole	Cyflufenamid	Potassium Phosphonates	Difenoconazole	Clopyralid	1-naphthylacetic acid	Trifloxystrobin	Penthiopyrad	2,4-D	Glyphosate	Fluopyram	Mancozeb	Captan	Pyrimethanil	Methoxyfenozide	Fluxapyroxad	Fluroxypyr	Indoxacarb	Kresoxim methyl	Dodine	Proquinazid	Penconazole
GBR_AP12E	GBR_APP_12_A	Apis mellifera	United Kingdom	Apple	51.18590	47.10	474.394	76.831	11.994	1.716	56.96	6.17	Dithianon	Spirotetramat	Boscalid	Pyraclostrobin	Thiacloprid	Acetamiprid	Chlorantraniliprole	Cyflufenamid	Potassium Phosphonates	Difenoconazole	Clopyralid	1-naphthylacetic acid	Trifloxystrobin	Penthiopyrad	2,4-D	Glyphosate	Fluopyram	Mancozeb	Captan	Pyrimethanil	Methoxyfenozide	Fluxapyroxad	Fluroxypyr	Indoxacarb	Kresoxim methyl	Dodine	Proquinazid	Penconazole
GBR_AP13A	GBR_APP_13_A	Apis mellifera	United Kingdom	Apple	51.14314	38.36	365.664	86.237	5.431	1.436	55.24	6.06	Dithianon	Spirotetramat	Boscalid	Pyraclostrobin	Thiacloprid	Acetamiprid	Chlorantraniliprole	Cyflufenamid	Potassium Phosphonates	Difenoconazole	Clopyralid	1-naphthylacetic acid	Trifloxystrobin	Penthiopyrad	2,4-D	Glyphosate	Fluopyram	Mancozeb	Captan	Pyrimethanil	Methoxyfenozide	Fluxapyroxad	Fluroxypyr	Indoxacarb	Kresoxim methyl	Dodine	Proquinazid	Penconazole
GBR_AP13B	GBR_APP_13_A	Apis mellifera	United Kingdom	Apple	51.14314	38.36	365.664	86.237	5.431	1.436	55.24	2.78	Dithianon	Spirotetramat	Boscalid	Pyraclostrobin	Thiacloprid	Acetamiprid	Chlorantraniliprole	Cyflufenamid	Potassium Phosphonates	Difenoconazole	Clopyralid	1-naphthylacetic acid	Trifloxystrobin	Penthiopyrad	2,4-D	Glyphosate	Fluopyram	Mancozeb	Captan	Pyrimethanil	Methoxyfenozide	Fluxapyroxad	Fluroxypyr	Indoxacarb	Kresoxim methyl	Dodine	Proquinazid	Penconazole
GBR_AP13C	GBR_APP_13_A	Apis mellifera	United Kingdom	Apple	51.14314	38.36	365.664	86.237	5.431	1.436	55.24	4.48	Dithianon	Spirotetramat	Boscalid	Pyraclostrobin	Thiacloprid	Acetamiprid	Chlorantraniliprole	Cyflufenamid	Potassium Phosphonates	Difenoconazole	Clopyralid	1-naphthylacetic acid	Trifloxystrobin	Penthiopyrad	2,4-D	Glyphosate	Fluopyram	Mancozeb	Captan	Pyrimethanil	Methoxyfenozide	Fluxapyroxad	Fluroxypyr	Indoxacarb	Kresoxim methyl	Dodine	Proquinazid	Penconazole
GBR_AP13D	GBR_APP_13_A	Apis mellifera	United Kingdom	Apple	51.14314	38.36	365.664	86.237	5.431	1.436	55.24	4.59	Dithianon	Spirotetramat	Boscalid	Pyraclostrobin	Thiacloprid	Acetamiprid	Chlorantraniliprole	Cyflufenamid	Potassium Phosphonates	Difenoconazole	Clopyralid	1-naphthylacetic acid	Trifloxystrobin	Penthiopyrad	2,4-D	Glyphosate	Fluopyram	Mancozeb	Captan	Pyrimethanil	Methoxyfenozide	Fluxapyroxad	Fluroxypyr	Indoxacarb	Kresoxim methyl	Dodine	Proquinazid	Penconazole
GBR_AP13E	GBR_APP_13_A	Apis mellifera	United Kingdom	Apple	51.14314	38.36	365.664	86.237	5.431	1.436	55.24	5.96	Dithianon	Spirotetramat	Boscalid	Pyraclostrobin	Thiacloprid	Acetamiprid	Chlorantraniliprole	Cyflufenamid	Potassium Phosphonates	Difenoconazole	Clopyralid	1-naphthylacetic acid	Trifloxystrobin	Penthiopyrad	2,4-D	Glyphosate	Fluopyram	Mancozeb	Captan	Pyrimethanil	Methoxyfenozide	Fluxapyroxad	Fluroxypyr	Indoxacarb	Kresoxim methyl	Dodine	Proquinazid	Penconazole
GBR_AP14A	GBR_APP_14_A	Apis mellifera	United Kingdom	Apple	51.03770	27.36	480.72	108.745	6.108	1.494	31.17	7.76	Glyphosate	Boscalid	Pyraclostrobin	Captan	Ethephon	Copper oxychloride	Dithianon	Potassium Phosphonates	Difenoconazole	Penthiopyrad	Fludioxonil	6-Benzyladenine	Prohexadione	Flonicamid	Gibberellins (GA4/GA7)	Tebuconazole	Pyrimethanil	Fluxapyroxad	Indoxacarb	Dodine	NA	NA	NA	NA	NA	NA	NA	NA
GBR_AP14B	GBR_APP_14_A	Apis mellifera	United Kingdom	Apple	51.03770	27.36	480.72	108.745	6.108	1.494	31.17	4.20	Glyphosate	Boscalid	Pyraclostrobin	Captan	Ethephon	Copper oxychloride	Dithianon	Potassium Phosphonates	Difenoconazole	Penthiopyrad	Fludioxonil	6-Benzyladenine	Prohexadione	Flonicamid	Gibberellins (GA4/GA7)	Tebuconazole	Pyrimethanil	Fluxapyroxad	Indoxacarb	Dodine	NA	NA	NA	NA	NA	NA	NA	NA
GBR_AP14C	GBR_APP_14_A	Apis mellifera	United Kingdom	Apple	51.03770	27.36	480.72	108.745	6.108	1.494	31.17	4.51	Glyphosate	Boscalid	Pyraclostrobin	Captan	Ethephon	Copper oxychloride	Dithianon	Potassium Phosphonates	Difenoconazole	Penthiopyrad	Fludioxonil	6-Benzyladenine	Prohexadione	Flonicamid	Gibberellins (GA4/GA7)	Tebuconazole	Pyrimethanil	Fluxapyroxad	Indoxacarb	Dodine	NA	NA	NA	NA	NA	NA	NA	NA
GBR_AP14D	GBR_APP_14_A	Apis mellifera	United Kingdom	Apple	51.03770	27.36	480.72	108.745	6.108	1.494	31.17	6.72	Glyphosate	Boscalid	Pyraclostrobin	Captan	Ethephon	Copper oxychloride	Dithianon	Potassium Phosphonates	Difenoconazole	Penthiopyrad	Fludioxonil	6-Benzyladenine	Prohexadione	Flonicamid	Gibberellins (GA4/GA7)	Tebuconazole	Pyrimethanil	Fluxapyroxad	Indoxacarb	Dodine	NA	NA	NA	NA	NA	NA	NA	NA
GBR_AP14E	GBR_APP_14_A	Apis mellifera	United Kingdom	Apple	51.03770	27.36	480.72	108.745	6.108	1.494	31.17	8.15	Glyphosate	Boscalid	Pyraclostrobin	Captan	Ethephon	Copper oxychloride	Dithianon	Potassium Phosphonates	Difenoconazole	Penthiopyrad	Fludioxonil	6-Benzyladenine	Prohexadione	Flonicamid	Gibberellins (GA4/GA7)	Tebuconazole	Pyrimethanil	Fluxapyroxad	Indoxacarb	Dodine	NA	NA	NA	NA	NA	NA	NA	NA
GBR_AP15A	GBR_APP_15_A	Apis mellifera	United Kingdom	Apple	51.22065	25.83	353.273	113.524	4.918	1.402	2.65	3.92	Spirotetramat	Chlorantraniliprole	Methoxyfenozide	Acetamiprid	NA	NA	NA	NA	NA	NA	NA	NA	NA	NA	NA	NA	NA	NA	NA	NA	NA	NA	NA	NA	NA	NA	NA	NA
GBR_AP15B	GBR_APP_15_A	Apis mellifera	United Kingdom	Apple	51.22065	25.83	353.273	113.524	4.918	1.402	2.65	2.85	Spirotetramat	Chlorantraniliprole	Methoxyfenozide	Acetamiprid	NA	NA	NA	NA	NA	NA	NA	NA	NA	NA	NA	NA	NA	NA	NA	NA	NA	NA	NA	NA	NA	NA	NA	NA
GBR_AP15C	GBR_APP_15_A	Apis mellifera	United Kingdom	Apple	51.22065	25.83	353.273	113.524	4.918	1.402	2.65	4.24	Spirotetramat	Chlorantraniliprole	Methoxyfenozide	Acetamiprid	NA	NA	NA	NA	NA	NA	NA	NA	NA	NA	NA	NA	NA	NA	NA	NA	NA	NA	NA	NA	NA	NA	NA	NA
GBR_AP15D	GBR_APP_15_A	Apis mellifera	United Kingdom	Apple	51.22065	25.83	353.273	113.524	4.918	1.402	2.65	5.26	Spirotetramat	Chlorantraniliprole	Methoxyfenozide	Acetamiprid	NA	NA	NA	NA	NA	NA	NA	NA	NA	NA	NA	NA	NA	NA	NA	NA	NA	NA	NA	NA	NA	NA	NA	NA
GBR_AP15E	GBR_APP_15_A	Apis mellifera	United Kingdom	Apple	51.22065	25.83	353.273	113.524	4.918	1.402	2.65	4.77	Spirotetramat	Chlorantraniliprole	Methoxyfenozide	Acetamiprid	NA	NA	NA	NA	NA	NA	NA	NA	NA	NA	NA	NA	NA	NA	NA	NA	NA	NA	NA	NA	NA	NA	NA	NA
GBR_AP16A	GBR_APP_16_A	Apis mellifera	United Kingdom	Apple	51.20243	39.72	450.396	124.091	7.873	1.521	28.94	7.89	Boscalid	Pyraclostrobin	Captan	Chlorantraniliprole	Dithianon	Potassium Phosphonates	Difenoconazole	Trifloxystrobin	Sulphur	Flonicamid	Glyphosate	Methoxyfenozide	Pyrimethanil	Fluxapyroxad	Dodine	Proquinazid	Penconazole	NA	NA	NA	NA	NA	NA	NA	NA	NA	NA	NA
GBR_AP16B	GBR_APP_16_A	Apis mellifera	United Kingdom	Apple	51.20243	39.72	450.396	124.091	7.873	1.521	28.94	7.71	Boscalid	Pyraclostrobin	Captan	Chlorantraniliprole	Dithianon	Potassium Phosphonates	Difenoconazole	Trifloxystrobin	Sulphur	Flonicamid	Glyphosate	Methoxyfenozide	Pyrimethanil	Fluxapyroxad	Dodine	Proquinazid	Penconazole	NA	NA	NA	NA	NA	NA	NA	NA	NA	NA	NA
GBR_AP16C	GBR_APP_16_A	Apis mellifera	United Kingdom	Apple	51.20243	39.72	450.396	124.091	7.873	1.521	28.94	11.67	Boscalid	Pyraclostrobin	Captan	Chlorantraniliprole	Dithianon	Potassium Phosphonates	Difenoconazole	Trifloxystrobin	Sulphur	Flonicamid	Glyphosate	Methoxyfenozide	Pyrimethanil	Fluxapyroxad	Dodine	Proquinazid	Penconazole	NA	NA	NA	NA	NA	NA	NA	NA	NA	NA	NA
GBR_AP16D	GBR_APP_16_A	Apis mellifera	United Kingdom	Apple	51.20243	39.72	450.396	124.091	7.873	1.521	28.94	10.80	Boscalid	Pyraclostrobin	Captan	Chlorantraniliprole	Dithianon	Potassium Phosphonates	Difenoconazole	Trifloxystrobin	Sulphur	Flonicamid	Glyphosate	Methoxyfenozide	Pyrimethanil	Fluxapyroxad	Dodine	Proquinazid	Penconazole	NA	NA	NA	NA	NA	NA	NA	NA	NA	NA	NA
GBR_AP16E	GBR_APP_16_A	Apis mellifera	United Kingdom	Apple	51.20243	39.72	450.396	124.091	7.873	1.521	28.94	8.20	Boscalid	Pyraclostrobin	Captan	Chlorantraniliprole	Dithianon	Potassium Phosphonates	Difenoconazole	Trifloxystrobin	Sulphur	Flonicamid	Glyphosate	Methoxyfenozide	Pyrimethanil	Fluxapyroxad	Dodine	Proquinazid	Penconazole	NA	NA	NA	NA	NA	NA	NA	NA	NA	NA	NA
GBR_B1A	GBR_OSR_01_B	Bombus terrestris	United Kingdom	Oilseed rape	51.49315	49.32	313.72	78.051	7.756	1.307	12.58	7.27	Aminopyralid	Propyzamide	Clomazone	Clethodim	Lambda-cyhalothrin	Prothioconazole	Glyphosate	Propaquizafop	Metazachlor	NA	NA	NA	NA	NA	NA	NA	NA	NA	NA	NA	NA	NA	NA	NA	NA	NA	NA	NA
GBR_B1B	GBR_OSR_01_B	Bombus terrestris	United Kingdom	Oilseed rape	51.49315	49.32	313.72	78.051	7.756	1.307	12.58	5.77	Aminopyralid	Propyzamide	Clomazone	Clethodim	Lambda-cyhalothrin	Prothioconazole	Glyphosate	Propaquizafop	Metazachlor	NA	NA	NA	NA	NA	NA	NA	NA	NA	NA	NA	NA	NA	NA	NA	NA	NA	NA	NA
GBR_B1C	GBR_OSR_01_B	Bombus terrestris	United Kingdom	Oilseed rape	51.49315	49.32	313.72	78.051	7.756	1.307	12.58	7.94	Aminopyralid	Propyzamide	Clomazone	Clethodim	Lambda-cyhalothrin	Prothioconazole	Glyphosate	Propaquizafop	Metazachlor	NA	NA	NA	NA	NA	NA	NA	NA	NA	NA	NA	NA	NA	NA	NA	NA	NA	NA	NA
GBR_B1D	GBR_OSR_01_B	Bombus terrestris	United Kingdom	Oilseed rape	51.49315	49.32	313.72	78.051	7.756	1.307	12.58	8.99	Aminopyralid	Propyzamide	Clomazone	Clethodim	Lambda-cyhalothrin	Prothioconazole	Glyphosate	Propaquizafop	Metazachlor	NA	NA	NA	NA	NA	NA	NA	NA	NA	NA	NA	NA	NA	NA	NA	NA	NA	NA	NA
GBR_B1E	GBR_OSR_01_B	Bombus terrestris	United Kingdom	Oilseed rape	51.49315	49.32	313.72	78.051	7.756	1.307	12.58	8.93	Aminopyralid	Propyzamide	Clomazone	Clethodim	Lambda-cyhalothrin	Prothioconazole	Glyphosate	Propaquizafop	Metazachlor	NA	NA	NA	NA	NA	NA	NA	NA	NA	NA	NA	NA	NA	NA	NA	NA	NA	NA	NA
GBR_B2A	GBR_OSR_02_B	Bombus terrestris	United Kingdom	Oilseed rape	51.63219	46.6	330.145	93.205	2.981	1.285	19.399	3.57	Azoxystrobin	Imazamox	Metazachlor	Deltamethrin	Clopyralid	Picloram	Metaldehyde	Lambda-cyhalothrin	Propyzamide	Difenoconazole	Prothioconazole	Ferric phosphate	Ferric phosphate (anhydrous)	Glyphosate	NA	NA	NA	NA	NA	NA	NA	NA	NA	NA	NA	NA	NA	NA
GBR_B2B	GBR_OSR_02_B	Bombus terrestris	United Kingdom	Oilseed rape	51.63219	46.6	330.145	93.205	2.981	1.285	19.399	3.80	Azoxystrobin	Imazamox	Metazachlor	Deltamethrin	Clopyralid	Picloram	Metaldehyde	Lambda-cyhalothrin	Propyzamide	Difenoconazole	Prothioconazole	Ferric phosphate	Ferric phosphate (anhydrous)	Glyphosate	NA	NA	NA	NA	NA	NA	NA	NA	NA	NA	NA	NA	NA	NA
GBR_B2C	GBR_OSR_02_B	Bombus terrestris	United Kingdom	Oilseed rape	51.63219	46.6	330.145	93.205	2.981	1.285	19.399	5.97	Azoxystrobin	Imazamox	Metazachlor	Deltamethrin	Clopyralid	Picloram	Metaldehyde	Lambda-cyhalothrin	Propyzamide	Difenoconazole	Prothioconazole	Ferric phosphate	Ferric phosphate (anhydrous)	Glyphosate	NA	NA	NA	NA	NA	NA	NA	NA	NA	NA	NA	NA	NA	NA
GBR_B2D	GBR_OSR_02_B	Bombus terrestris	United Kingdom	Oilseed rape	51.63219	46.6	330.145	93.205	2.981	1.285	19.399	4.94	Azoxystrobin	Imazamox	Metazachlor	Deltamethrin	Clopyralid	Picloram	Metaldehyde	Lambda-cyhalothrin	Propyzamide	Difenoconazole	Prothioconazole	Ferric phosphate	Ferric phosphate (anhydrous)	Glyphosate	NA	NA	NA	NA	NA	NA	NA	NA	NA	NA	NA	NA	NA	NA
GBR_B2E	GBR_OSR_02_B	Bombus terrestris	United Kingdom	Oilseed rape	51.63219	46.6	330.145	93.205	2.981	1.285	19.399	5.26	Azoxystrobin	Imazamox	Metazachlor	Deltamethrin	Clopyralid	Picloram	Metaldehyde	Lambda-cyhalothrin	Propyzamide	Difenoconazole	Prothioconazole	Ferric phosphate	Ferric phosphate (anhydrous)	Glyphosate	NA	NA	NA	NA	NA	NA	NA	NA	NA	NA	NA	NA	NA	NA
GBR_B3A	GBR_OSR_03_B	Bombus terrestris	United Kingdom	Oilseed rape	51.55058	75.37	201.505	42.421	0.944	0.792	5	5.81	Aminopyralid	Propyzamide	Cypermethrin	Propaquizafop	Prothioconazole	Metazachlor	Tebuconazole	Thiophanate-methyl	NA	NA	NA	NA	NA	NA	NA	NA	NA	NA	NA	NA	NA	NA	NA	NA	NA	NA	NA	NA
GBR_B3B	GBR_OSR_03_B	Bombus terrestris	United Kingdom	Oilseed rape	51.55058	75.37	201.505	42.421	0.944	0.792	5	4.96	Aminopyralid	Propyzamide	Cypermethrin	Propaquizafop	Prothioconazole	Metazachlor	Tebuconazole	Thiophanate-methyl	NA	NA	NA	NA	NA	NA	NA	NA	NA	NA	NA	NA	NA	NA	NA	NA	NA	NA	NA	NA
GBR_B3C	GBR_OSR_03_B	Bombus terrestris	United Kingdom	Oilseed rape	51.55058	75.37	201.505	42.421	0.944	0.792	5	3.77	Aminopyralid	Propyzamide	Cypermethrin	Propaquizafop	Prothioconazole	Metazachlor	Tebuconazole	Thiophanate-methyl	NA	NA	NA	NA	NA	NA	NA	NA	NA	NA	NA	NA	NA	NA	NA	NA	NA	NA	NA	NA
GBR_B3D	GBR_OSR_03_B	Bombus terrestris	United Kingdom	Oilseed rape	51.55058	75.37	201.505	42.421	0.944	0.792	5	5.10	Aminopyralid	Propyzamide	Cypermethrin	Propaquizafop	Prothioconazole	Metazachlor	Tebuconazole	Thiophanate-methyl	NA	NA	NA	NA	NA	NA	NA	NA	NA	NA	NA	NA	NA	NA	NA	NA	NA	NA	NA	NA
GBR_B3E	GBR_OSR_03_B	Bombus terrestris	United Kingdom	Oilseed rape	51.55058	75.37	201.505	42.421	0.944	0.792	5	4.17	Aminopyralid	Propyzamide	Cypermethrin	Propaquizafop	Prothioconazole	Metazachlor	Tebuconazole	Thiophanate-methyl	NA	NA	NA	NA	NA	NA	NA	NA	NA	NA	NA	NA	NA	NA	NA	NA	NA	NA	NA	NA
GBR_B4A	GBR_OSR_04_B	Bombus terrestris	United Kingdom	Oilseed rape	51.10779	70.11	304.123	42.398	2.494	0.928	10.644	6.04	Aminopyralid	Propyzamide	Azoxystrobin	Propaquizafop	Lambda-cyhalothrin	Glyphosate	Difenoconazole	Metazachlor	Tebuconazole	Tau-fluvalinate	NA	NA	NA	NA	NA	NA	NA	NA	NA	NA	NA	NA	NA	NA	NA	NA	NA	NA
GBR_B4B	GBR_OSR_04_B	Bombus terrestris	United Kingdom	Oilseed rape	51.10779	70.11	304.123	42.398	2.494	0.928	10.644	12.69	Aminopyralid	Propyzamide	Azoxystrobin	Propaquizafop	Lambda-cyhalothrin	Glyphosate	Difenoconazole	Metazachlor	Tebuconazole	Tau-fluvalinate	NA	NA	NA	NA	NA	NA	NA	NA	NA	NA	NA	NA	NA	NA	NA	NA	NA	NA
GBR_B4C	GBR_OSR_04_B	Bombus terrestris	United Kingdom	Oilseed rape	51.10779	70.11	304.123	42.398	2.494	0.928	10.644	7.74	Aminopyralid	Propyzamide	Azoxystrobin	Propaquizafop	Lambda-cyhalothrin	Glyphosate	Difenoconazole	Metazachlor	Tebuconazole	Tau-fluvalinate	NA	NA	NA	NA	NA	NA	NA	NA	NA	NA	NA	NA	NA	NA	NA	NA	NA	NA
GBR_B4D	GBR_OSR_04_B	Bombus terrestris	United Kingdom	Oilseed rape	51.10779	70.11	304.123	42.398	2.494	0.928	10.644	8.87	Aminopyralid	Propyzamide	Azoxystrobin	Propaquizafop	Lambda-cyhalothrin	Glyphosate	Difenoconazole	Metazachlor	Tebuconazole	Tau-fluvalinate	NA	NA	NA	NA	NA	NA	NA	NA	NA	NA	NA	NA	NA	NA	NA	NA	NA	NA
GBR_B4E	GBR_OSR_04_B	Bombus terrestris	United Kingdom	Oilseed rape	51.10779	70.11	304.123	42.398	2.494	0.928	10.644	5.05	Aminopyralid	Propyzamide	Azoxystrobin	Propaquizafop	Lambda-cyhalothrin	Glyphosate	Difenoconazole	Metazachlor	Tebuconazole	Tau-fluvalinate	NA	NA	NA	NA	NA	NA	NA	NA	NA	NA	NA	NA	NA	NA	NA	NA	NA	NA
GBR_B5A	GBR_OSR_05_B	Bombus terrestris	United Kingdom	Oilseed rape	51.47556	65.88	323.399	61.884	9.217	1.028	NA	5.34	NA	NA	NA	NA	NA	NA	NA	NA	NA	NA	NA	NA	NA	NA	NA	NA	NA	NA	NA	NA	NA	NA	NA	NA	NA	NA	NA	NA
GBR_B5B	GBR_OSR_05_B	Bombus terrestris	United Kingdom	Oilseed rape	51.47556	65.88	323.399	61.884	9.217	1.028	NA	5.63	NA	NA	NA	NA	NA	NA	NA	NA	NA	NA	NA	NA	NA	NA	NA	NA	NA	NA	NA	NA	NA	NA	NA	NA	NA	NA	NA	NA
GBR_B5C	GBR_OSR_05_B	Bombus terrestris	United Kingdom	Oilseed rape	51.47556	65.88	323.399	61.884	9.217	1.028	NA	8.58	NA	NA	NA	NA	NA	NA	NA	NA	NA	NA	NA	NA	NA	NA	NA	NA	NA	NA	NA	NA	NA	NA	NA	NA	NA	NA	NA	NA
GBR_B5D	GBR_OSR_05_B	Bombus terrestris	United Kingdom	Oilseed rape	51.47556	65.88	323.399	61.884	9.217	1.028	NA	8.62	NA	NA	NA	NA	NA	NA	NA	NA	NA	NA	NA	NA	NA	NA	NA	NA	NA	NA	NA	NA	NA	NA	NA	NA	NA	NA	NA	NA
GBR_B5E	GBR_OSR_05_B	Bombus terrestris	United Kingdom	Oilseed rape	51.47556	65.88	323.399	61.884	9.217	1.028	NA	9.01	NA	NA	NA	NA	NA	NA	NA	NA	NA	NA	NA	NA	NA	NA	NA	NA	NA	NA	NA	NA	NA	NA	NA	NA	NA	NA	NA	NA
GBR_B6A	GBR_OSR_06_B	Bombus terrestris	United Kingdom	Oilseed rape	51.22111	79.86	197.094	30.712	2.19	0.716	17.03	6.36	Aminopyralid	Propyzamide	Glyphosate	Clomazone	Prothioconazole	Ferric phosphate	Ferric phosphate (anhydrous)	NA	NA	NA	NA	NA	NA	NA	NA	NA	NA	NA	NA	NA	NA	NA	NA	NA	NA	NA	NA	NA
GBR_B6B	GBR_OSR_06_B	Bombus terrestris	United Kingdom	Oilseed rape	51.22111	79.86	197.094	30.712	2.19	0.716	17.03	10.55	Aminopyralid	Propyzamide	Glyphosate	Clomazone	Prothioconazole	Ferric phosphate	Ferric phosphate (anhydrous)	NA	NA	NA	NA	NA	NA	NA	NA	NA	NA	NA	NA	NA	NA	NA	NA	NA	NA	NA	NA	NA
GBR_B6C	GBR_OSR_06_B	Bombus terrestris	United Kingdom	Oilseed rape	51.22111	79.86	197.094	30.712	2.19	0.716	17.03	9.46	Aminopyralid	Propyzamide	Glyphosate	Clomazone	Prothioconazole	Ferric phosphate	Ferric phosphate (anhydrous)	NA	NA	NA	NA	NA	NA	NA	NA	NA	NA	NA	NA	NA	NA	NA	NA	NA	NA	NA	NA	NA
GBR_B6D	GBR_OSR_06_B	Bombus terrestris	United Kingdom	Oilseed rape	51.22111	79.86	197.094	30.712	2.19	0.716	17.03	6.73	Aminopyralid	Propyzamide	Glyphosate	Clomazone	Prothioconazole	Ferric phosphate	Ferric phosphate (anhydrous)	NA	NA	NA	NA	NA	NA	NA	NA	NA	NA	NA	NA	NA	NA	NA	NA	NA	NA	NA	NA	NA
GBR_B6E	GBR_OSR_06_B	Bombus terrestris	United Kingdom	Oilseed rape	51.22111	79.86	197.094	30.712	2.19	0.716	17.03	10.26	Aminopyralid	Propyzamide	Glyphosate	Clomazone	Prothioconazole	Ferric phosphate	Ferric phosphate (anhydrous)	NA	NA	NA	NA	NA	NA	NA	NA	NA	NA	NA	NA	NA	NA	NA	NA	NA	NA	NA	NA	NA
GBR_B7A	GBR_OSR_07_B	Bombus terrestris	United Kingdom	Oilseed rape	51.35413	38.23	438.45	108.781	3.333	1.34	8.35	9.64	Aminopyralid	Propyzamide	Clomazone	Clethodim	Glyphosate	Difenoconazole	NA	NA	NA	NA	NA	NA	NA	NA	NA	NA	NA	NA	NA	NA	NA	NA	NA	NA	NA	NA	NA	NA
GBR_B7B	GBR_OSR_07_B	Bombus terrestris	United Kingdom	Oilseed rape	51.35413	38.23	438.45	108.781	3.333	1.34	8.35	6.82	Aminopyralid	Propyzamide	Clomazone	Clethodim	Glyphosate	Difenoconazole	NA	NA	NA	NA	NA	NA	NA	NA	NA	NA	NA	NA	NA	NA	NA	NA	NA	NA	NA	NA	NA	NA
GBR_B7C	GBR_OSR_07_B	Bombus terrestris	United Kingdom	Oilseed rape	51.35413	38.23	438.45	108.781	3.333	1.34	8.35	5.64	Aminopyralid	Propyzamide	Clomazone	Clethodim	Glyphosate	Difenoconazole	NA	NA	NA	NA	NA	NA	NA	NA	NA	NA	NA	NA	NA	NA	NA	NA	NA	NA	NA	NA	NA	NA
GBR_B7D	GBR_OSR_07_B	Bombus terrestris	United Kingdom	Oilseed rape	51.35413	38.23	438.45	108.781	3.333	1.34	8.35	8.87	Aminopyralid	Propyzamide	Clomazone	Clethodim	Glyphosate	Difenoconazole	NA	NA	NA	NA	NA	NA	NA	NA	NA	NA	NA	NA	NA	NA	NA	NA	NA	NA	NA	NA	NA	NA
GBR_B7E	GBR_OSR_07_B	Bombus terrestris	United Kingdom	Oilseed rape	51.35413	38.23	438.45	108.781	3.333	1.34	8.35	7.46	Aminopyralid	Propyzamide	Clomazone	Clethodim	Glyphosate	Difenoconazole	NA	NA	NA	NA	NA	NA	NA	NA	NA	NA	NA	NA	NA	NA	NA	NA	NA	NA	NA	NA	NA	NA
GBR_B8A	GBR_OSR_08_B	Bombus terrestris	United Kingdom	Oilseed rape	51.37269	43.45	516.581	94.521	16.264	1.416	12.921	6.90	Dimethenamid-P	Metazachlor	Quinmerac	Mepiquat-Chloride	Metconazole	Clethodim	Clomazone	Propaquizafop	Glyphosate	Metaldehyde	Lambda-cyhalothrin	Propyzamide	Tau-fluvalinate	Prothioconazole	Tebuconazole	NA	NA	NA	NA	NA	NA	NA	NA	NA	NA	NA	NA	NA
GBR_B8B	GBR_OSR_08_B	Bombus terrestris	United Kingdom	Oilseed rape	51.37269	43.45	516.581	94.521	16.264	1.416	12.921	5.64	Dimethenamid-P	Metazachlor	Quinmerac	Mepiquat-Chloride	Metconazole	Clethodim	Clomazone	Propaquizafop	Glyphosate	Metaldehyde	Lambda-cyhalothrin	Propyzamide	Tau-fluvalinate	Prothioconazole	Tebuconazole	NA	NA	NA	NA	NA	NA	NA	NA	NA	NA	NA	NA	NA
GBR_B8C	GBR_OSR_08_B	Bombus terrestris	United Kingdom	Oilseed rape	51.37269	43.45	516.581	94.521	16.264	1.416	12.921	8.33	Dimethenamid-P	Metazachlor	Quinmerac	Mepiquat-Chloride	Metconazole	Clethodim	Clomazone	Propaquizafop	Glyphosate	Metaldehyde	Lambda-cyhalothrin	Propyzamide	Tau-fluvalinate	Prothioconazole	Tebuconazole	NA	NA	NA	NA	NA	NA	NA	NA	NA	NA	NA	NA	NA
GBR_B8D	GBR_OSR_08_B	Bombus terrestris	United Kingdom	Oilseed rape	51.37269	43.45	516.581	94.521	16.264	1.416	12.921	7.89	Dimethenamid-P	Metazachlor	Quinmerac	Mepiquat-Chloride	Metconazole	Clethodim	Clomazone	Propaquizafop	Glyphosate	Metaldehyde	Lambda-cyhalothrin	Propyzamide	Tau-fluvalinate	Prothioconazole	Tebuconazole	NA	NA	NA	NA	NA	NA	NA	NA	NA	NA	NA	NA	NA
GBR_B8E	GBR_OSR_08_B	Bombus terrestris	United Kingdom	Oilseed rape	51.37269	43.45	516.581	94.521	16.264	1.416	12.921	8.60	Dimethenamid-P	Metazachlor	Quinmerac	Mepiquat-Chloride	Metconazole	Clethodim	Clomazone	Propaquizafop	Glyphosate	Metaldehyde	Lambda-cyhalothrin	Propyzamide	Tau-fluvalinate	Prothioconazole	Tebuconazole	NA	NA	NA	NA	NA	NA	NA	NA	NA	NA	NA	NA	NA
GBR_B9A	GBR_APP_09_B	Bombus terrestris	United Kingdom	Apple	51.10998	25.84	397.756	78.725	4.706	1.421	36.6	4.79	Cydia pomonella granulovirus (CpGV)	Copper Oxychloride	Spinosad	Sulphur	NA	NA	NA	NA	NA	NA	NA	NA	NA	NA	NA	NA	NA	NA	NA	NA	NA	NA	NA	NA	NA	NA	NA	NA
GBR_B9B	GBR_APP_09_B	Bombus terrestris	United Kingdom	Apple	51.10998	25.84	397.756	78.725	4.706	1.421	36.6	5.38	Cydia pomonella granulovirus (CpGV)	Copper Oxychloride	Spinosad	Sulphur	NA	NA	NA	NA	NA	NA	NA	NA	NA	NA	NA	NA	NA	NA	NA	NA	NA	NA	NA	NA	NA	NA	NA	NA
GBR_B9C	GBR_APP_09_B	Bombus terrestris	United Kingdom	Apple	51.10998	25.84	397.756	78.725	4.706	1.421	36.6	4.80	Cydia pomonella granulovirus (CpGV)	Copper Oxychloride	Spinosad	Sulphur	NA	NA	NA	NA	NA	NA	NA	NA	NA	NA	NA	NA	NA	NA	NA	NA	NA	NA	NA	NA	NA	NA	NA	NA
GBR_B9D	GBR_APP_09_B	Bombus terrestris	United Kingdom	Apple	51.10998	25.84	397.756	78.725	4.706	1.421	36.6	4.82	Cydia pomonella granulovirus (CpGV)	Copper Oxychloride	Spinosad	Sulphur	NA	NA	NA	NA	NA	NA	NA	NA	NA	NA	NA	NA	NA	NA	NA	NA	NA	NA	NA	NA	NA	NA	NA	NA
GBR_B9E	GBR_APP_09_B	Bombus terrestris	United Kingdom	Apple	51.10998	25.84	397.756	78.725	4.706	1.421	36.6	6.12	Cydia pomonella granulovirus (CpGV)	Copper Oxychloride	Spinosad	Sulphur	NA	NA	NA	NA	NA	NA	NA	NA	NA	NA	NA	NA	NA	NA	NA	NA	NA	NA	NA	NA	NA	NA	NA	NA
GBR_B10A	GBR_APP_10_B	Bombus terrestris	United Kingdom	Apple	51.29911	65.68	339.325	66.952	6.658	1.488	180.48	6.56	Cydia pomonella granulovirus (CpGV)	Bacillus thuringiensis kurstaki ABTS-351	Copper	Sulphur	Spinosad	NA	NA	NA	NA	NA	NA	NA	NA	NA	NA	NA	NA	NA	NA	NA	NA	NA	NA	NA	NA	NA	NA	NA
GBR_B10B	GBR_APP_10_B	Bombus terrestris	United Kingdom	Apple	51.29911	65.68	339.325	66.952	6.658	1.488	180.48	6.67	Cydia pomonella granulovirus (CpGV)	Bacillus thuringiensis kurstaki ABTS-351	Copper	Sulphur	Spinosad	NA	NA	NA	NA	NA	NA	NA	NA	NA	NA	NA	NA	NA	NA	NA	NA	NA	NA	NA	NA	NA	NA	NA
GBR_B10C	GBR_APP_10_B	Bombus terrestris	United Kingdom	Apple	51.29911	65.68	339.325	66.952	6.658	1.488	180.48	8.24	Cydia pomonella granulovirus (CpGV)	Bacillus thuringiensis kurstaki ABTS-351	Copper	Sulphur	Spinosad	NA	NA	NA	NA	NA	NA	NA	NA	NA	NA	NA	NA	NA	NA	NA	NA	NA	NA	NA	NA	NA	NA	NA
GBR_B10D	GBR_APP_10_B	Bombus terrestris	United Kingdom	Apple	51.29911	65.68	339.325	66.952	6.658	1.488	180.48	4.49	Cydia pomonella granulovirus (CpGV)	Bacillus thuringiensis kurstaki ABTS-351	Copper	Sulphur	Spinosad	NA	NA	NA	NA	NA	NA	NA	NA	NA	NA	NA	NA	NA	NA	NA	NA	NA	NA	NA	NA	NA	NA	NA
GBR_B10E	GBR_APP_10_B	Bombus terrestris	United Kingdom	Apple	51.29911	65.68	339.325	66.952	6.658	1.488	180.48	4.76	Cydia pomonella granulovirus (CpGV)	Bacillus thuringiensis kurstaki ABTS-351	Copper	Sulphur	Spinosad	NA	NA	NA	NA	NA	NA	NA	NA	NA	NA	NA	NA	NA	NA	NA	NA	NA	NA	NA	NA	NA	NA	NA
GBR_B11A	GBR_APP_11_B	Bombus terrestris	United Kingdom	Apple	51.38737	53.52	487.675	75.349	14.07	1.599	21.27	10.53	Dithianon	Propyzamide	Copper Oxychloride	2,4-D	Penthiopyrad	Acetamiprid	Glyphosate	Captan	Pyrimethanil	Methoxyfenozide	Fluxapyroxad	Dodine	NA	NA	NA	NA	NA	NA	NA	NA	NA	NA	NA	NA	NA	NA	NA	NA
GBR_B11B	GBR_APP_11_B	Bombus terrestris	United Kingdom	Apple	51.38737	53.52	487.675	75.349	14.07	1.599	21.27	6.94	Dithianon	Propyzamide	Copper Oxychloride	2,4-D	Penthiopyrad	Acetamiprid	Glyphosate	Captan	Pyrimethanil	Methoxyfenozide	Fluxapyroxad	Dodine	NA	NA	NA	NA	NA	NA	NA	NA	NA	NA	NA	NA	NA	NA	NA	NA
GBR_B11C	GBR_APP_11_B	Bombus terrestris	United Kingdom	Apple	51.38737	53.52	487.675	75.349	14.07	1.599	21.27	10.32	Dithianon	Propyzamide	Copper Oxychloride	2,4-D	Penthiopyrad	Acetamiprid	Glyphosate	Captan	Pyrimethanil	Methoxyfenozide	Fluxapyroxad	Dodine	NA	NA	NA	NA	NA	NA	NA	NA	NA	NA	NA	NA	NA	NA	NA	NA
GBR_B11D	GBR_APP_11_B	Bombus terrestris	United Kingdom	Apple	51.38737	53.52	487.675	75.349	14.07	1.599	21.27	6.82	Dithianon	Propyzamide	Copper Oxychloride	2,4-D	Penthiopyrad	Acetamiprid	Glyphosate	Captan	Pyrimethanil	Methoxyfenozide	Fluxapyroxad	Dodine	NA	NA	NA	NA	NA	NA	NA	NA	NA	NA	NA	NA	NA	NA	NA	NA
GBR_B11E	GBR_APP_11_B	Bombus terrestris	United Kingdom	Apple	51.38737	53.52	487.675	75.349	14.07	1.599	21.27	7.44	Dithianon	Propyzamide	Copper Oxychloride	2,4-D	Penthiopyrad	Acetamiprid	Glyphosate	Captan	Pyrimethanil	Methoxyfenozide	Fluxapyroxad	Dodine	NA	NA	NA	NA	NA	NA	NA	NA	NA	NA	NA	NA	NA	NA	NA	NA
GBR_B12A	GBR_APP_12_B	Bombus terrestris	United Kingdom	Apple	51.18590	47.10	474.394	76.831	11.994	1.716	56.96	7.47	Dithianon	Spirotetramat	Boscalid	Pyraclostrobin	Thiacloprid	Acetamiprid	Chlorantraniliprole	Cyflufenamid	Potassium Phosphonates	Difenoconazole	Clopyralid	1-naphthylacetic acid	Trifloxystrobin	Penthiopyrad	2,4-D	Glyphosate	Fluopyram	Mancozeb	Captan	Pyrimethanil	Methoxyfenozide	Fluxapyroxad	Fluroxypyr	Indoxacarb	Kresoxim methyl	Dodine	Proquinazid	Penconazole
GBR_B12B	GBR_APP_12_B	Bombus terrestris	United Kingdom	Apple	51.18590	47.10	474.394	76.831	11.994	1.716	56.96	8.04	Dithianon	Spirotetramat	Boscalid	Pyraclostrobin	Thiacloprid	Acetamiprid	Chlorantraniliprole	Cyflufenamid	Potassium Phosphonates	Difenoconazole	Clopyralid	1-naphthylacetic acid	Trifloxystrobin	Penthiopyrad	2,4-D	Glyphosate	Fluopyram	Mancozeb	Captan	Pyrimethanil	Methoxyfenozide	Fluxapyroxad	Fluroxypyr	Indoxacarb	Kresoxim methyl	Dodine	Proquinazid	Penconazole
GBR_B12C	GBR_APP_12_B	Bombus terrestris	United Kingdom	Apple	51.18590	47.10	474.394	76.831	11.994	1.716	56.96	5.60	Dithianon	Spirotetramat	Boscalid	Pyraclostrobin	Thiacloprid	Acetamiprid	Chlorantraniliprole	Cyflufenamid	Potassium Phosphonates	Difenoconazole	Clopyralid	1-naphthylacetic acid	Trifloxystrobin	Penthiopyrad	2,4-D	Glyphosate	Fluopyram	Mancozeb	Captan	Pyrimethanil	Methoxyfenozide	Fluxapyroxad	Fluroxypyr	Indoxacarb	Kresoxim methyl	Dodine	Proquinazid	Penconazole
GBR_B12D	GBR_APP_12_B	Bombus terrestris	United Kingdom	Apple	51.18590	47.10	474.394	76.831	11.994	1.716	56.96	7.30	Dithianon	Spirotetramat	Boscalid	Pyraclostrobin	Thiacloprid	Acetamiprid	Chlorantraniliprole	Cyflufenamid	Potassium Phosphonates	Difenoconazole	Clopyralid	1-naphthylacetic acid	Trifloxystrobin	Penthiopyrad	2,4-D	Glyphosate	Fluopyram	Mancozeb	Captan	Pyrimethanil	Methoxyfenozide	Fluxapyroxad	Fluroxypyr	Indoxacarb	Kresoxim methyl	Dodine	Proquinazid	Penconazole
GBR_B12E	GBR_APP_12_B	Bombus terrestris	United Kingdom	Apple	51.18590	47.10	474.394	76.831	11.994	1.716	56.96	12.94	Dithianon	Spirotetramat	Boscalid	Pyraclostrobin	Thiacloprid	Acetamiprid	Chlorantraniliprole	Cyflufenamid	Potassium Phosphonates	Difenoconazole	Clopyralid	1-naphthylacetic acid	Trifloxystrobin	Penthiopyrad	2,4-D	Glyphosate	Fluopyram	Mancozeb	Captan	Pyrimethanil	Methoxyfenozide	Fluxapyroxad	Fluroxypyr	Indoxacarb	Kresoxim methyl	Dodine	Proquinazid	Penconazole
GBR_B13A	GBR_APP_13_B	Bombus terrestris	United Kingdom	Apple	51.14314	38.36	365.664	86.237	5.431	1.436	55.25	10.43	Dithianon	Spirotetramat	Boscalid	Pyraclostrobin	Thiacloprid	Acetamiprid	Chlorantraniliprole	Cyflufenamid	Potassium Phosphonates	Difenoconazole	Clopyralid	1-naphthylacetic acid	Trifloxystrobin	Penthiopyrad	2,4-D	Glyphosate	Fluopyram	Mancozeb	Captan	Pyrimethanil	Methoxyfenozide	Fluxapyroxad	Fluroxypyr	Indoxacarb	Kresoxim methyl	Dodine	Proquinazid	Penconazole
GBR_B13B	GBR_APP_13_B	Bombus terrestris	United Kingdom	Apple	51.14314	38.36	365.664	86.237	5.431	1.436	55.25	9.14	Dithianon	Spirotetramat	Boscalid	Pyraclostrobin	Thiacloprid	Acetamiprid	Chlorantraniliprole	Cyflufenamid	Potassium Phosphonates	Difenoconazole	Clopyralid	1-naphthylacetic acid	Trifloxystrobin	Penthiopyrad	2,4-D	Glyphosate	Fluopyram	Mancozeb	Captan	Pyrimethanil	Methoxyfenozide	Fluxapyroxad	Fluroxypyr	Indoxacarb	Kresoxim methyl	Dodine	Proquinazid	Penconazole
GBR_B13C	GBR_APP_13_B	Bombus terrestris	United Kingdom	Apple	51.14314	38.36	365.664	86.237	5.431	1.436	55.25	9.60	Dithianon	Spirotetramat	Boscalid	Pyraclostrobin	Thiacloprid	Acetamiprid	Chlorantraniliprole	Cyflufenamid	Potassium Phosphonates	Difenoconazole	Clopyralid	1-naphthylacetic acid	Trifloxystrobin	Penthiopyrad	2,4-D	Glyphosate	Fluopyram	Mancozeb	Captan	Pyrimethanil	Methoxyfenozide	Fluxapyroxad	Fluroxypyr	Indoxacarb	Kresoxim methyl	Dodine	Proquinazid	Penconazole
GBR_B13D	GBR_APP_13_B	Bombus terrestris	United Kingdom	Apple	51.14314	38.36	365.664	86.237	5.431	1.436	55.25	10.72	Dithianon	Spirotetramat	Boscalid	Pyraclostrobin	Thiacloprid	Acetamiprid	Chlorantraniliprole	Cyflufenamid	Potassium Phosphonates	Difenoconazole	Clopyralid	1-naphthylacetic acid	Trifloxystrobin	Penthiopyrad	2,4-D	Glyphosate	Fluopyram	Mancozeb	Captan	Pyrimethanil	Methoxyfenozide	Fluxapyroxad	Fluroxypyr	Indoxacarb	Kresoxim methyl	Dodine	Proquinazid	Penconazole
GBR_B13E	GBR_APP_13_B	Bombus terrestris	United Kingdom	Apple	51.14314	38.36	365.664	86.237	5.431	1.436	55.25	7.08	Dithianon	Spirotetramat	Boscalid	Pyraclostrobin	Thiacloprid	Acetamiprid	Chlorantraniliprole	Cyflufenamid	Potassium Phosphonates	Difenoconazole	Clopyralid	1-naphthylacetic acid	Trifloxystrobin	Penthiopyrad	2,4-D	Glyphosate	Fluopyram	Mancozeb	Captan	Pyrimethanil	Methoxyfenozide	Fluxapyroxad	Fluroxypyr	Indoxacarb	Kresoxim methyl	Dodine	Proquinazid	Penconazole
GBR_B14A	GBR_APP_14_B	Bombus terrestris	United Kingdom	Apple	51.03770	27.36	480.72	108.745	6.108	1.494	31.17	5.65	Glyphosate	Boscalid	Pyraclostrobin	Captan	Ethephon	Copper oxychloride	Dithianon	Potassium Phosphonates	Difenoconazole	Penthiopyrad	Fludioxonil	6-Benzyladenine	Prohexadione	Flonicamid	Gibberellins (GA4/GA7)	Tebuconazole	Pyrimethanil	Fluxapyroxad	Indoxacarb	Dodine	NA	NA	NA	NA	NA	NA	NA	NA
GBR_B14B	GBR_APP_14_B	Bombus terrestris	United Kingdom	Apple	51.03770	27.36	480.72	108.745	6.108	1.494	31.17	6.58	Glyphosate	Boscalid	Pyraclostrobin	Captan	Ethephon	Copper oxychloride	Dithianon	Potassium Phosphonates	Difenoconazole	Penthiopyrad	Fludioxonil	6-Benzyladenine	Prohexadione	Flonicamid	Gibberellins (GA4/GA7)	Tebuconazole	Pyrimethanil	Fluxapyroxad	Indoxacarb	Dodine	NA	NA	NA	NA	NA	NA	NA	NA
GBR_B14C	GBR_APP_14_B	Bombus terrestris	United Kingdom	Apple	51.03770	27.36	480.72	108.745	6.108	1.494	31.17	2.42	Glyphosate	Boscalid	Pyraclostrobin	Captan	Ethephon	Copper oxychloride	Dithianon	Potassium Phosphonates	Difenoconazole	Penthiopyrad	Fludioxonil	6-Benzyladenine	Prohexadione	Flonicamid	Gibberellins (GA4/GA7)	Tebuconazole	Pyrimethanil	Fluxapyroxad	Indoxacarb	Dodine	NA	NA	NA	NA	NA	NA	NA	NA
GBR_B14D	GBR_APP_14_B	Bombus terrestris	United Kingdom	Apple	51.03770	27.36	480.72	108.745	6.108	1.494	31.17	2.14	Glyphosate	Boscalid	Pyraclostrobin	Captan	Ethephon	Copper oxychloride	Dithianon	Potassium Phosphonates	Difenoconazole	Penthiopyrad	Fludioxonil	6-Benzyladenine	Prohexadione	Flonicamid	Gibberellins (GA4/GA7)	Tebuconazole	Pyrimethanil	Fluxapyroxad	Indoxacarb	Dodine	NA	NA	NA	NA	NA	NA	NA	NA
GBR_B14E	GBR_APP_14_B	Bombus terrestris	United Kingdom	Apple	51.03770	27.36	480.72	108.745	6.108	1.494	31.17	6.49	Glyphosate	Boscalid	Pyraclostrobin	Captan	Ethephon	Copper oxychloride	Dithianon	Potassium Phosphonates	Difenoconazole	Penthiopyrad	Fludioxonil	6-Benzyladenine	Prohexadione	Flonicamid	Gibberellins (GA4/GA7)	Tebuconazole	Pyrimethanil	Fluxapyroxad	Indoxacarb	Dodine	NA	NA	NA	NA	NA	NA	NA	NA
GBR_B15A	GBR_APP_15_B	Bombus terrestris	United Kingdom	Apple	51.22065	25.83	353.273	113.524	4.918	1.402	2.65	6.08	Spirotetramat	Chlorantraniliprole	Methoxyfenozide	Acetamiprid	NA	NA	NA	NA	NA	NA	NA	NA	NA	NA	NA	NA	NA	NA	NA	NA	NA	NA	NA	NA	NA	NA	NA	NA
GBR_B15B	GBR_APP_15_B	Bombus terrestris	United Kingdom	Apple	51.22065	25.83	353.273	113.524	4.918	1.402	2.65	8.21	Spirotetramat	Chlorantraniliprole	Methoxyfenozide	Acetamiprid	NA	NA	NA	NA	NA	NA	NA	NA	NA	NA	NA	NA	NA	NA	NA	NA	NA	NA	NA	NA	NA	NA	NA	NA
GBR_B15C	GBR_APP_15_B	Bombus terrestris	United Kingdom	Apple	51.22065	25.83	353.273	113.524	4.918	1.402	2.65	8.76	Spirotetramat	Chlorantraniliprole	Methoxyfenozide	Acetamiprid	NA	NA	NA	NA	NA	NA	NA	NA	NA	NA	NA	NA	NA	NA	NA	NA	NA	NA	NA	NA	NA	NA	NA	NA
GBR_B15D	GBR_APP_15_B	Bombus terrestris	United Kingdom	Apple	51.22065	25.83	353.273	113.524	4.918	1.402	2.65	5.49	Spirotetramat	Chlorantraniliprole	Methoxyfenozide	Acetamiprid	NA	NA	NA	NA	NA	NA	NA	NA	NA	NA	NA	NA	NA	NA	NA	NA	NA	NA	NA	NA	NA	NA	NA	NA
GBR_B15E	GBR_APP_15_B	Bombus terrestris	United Kingdom	Apple	51.22065	25.83	353.273	113.524	4.918	1.402	2.65	5.96	Spirotetramat	Chlorantraniliprole	Methoxyfenozide	Acetamiprid	NA	NA	NA	NA	NA	NA	NA	NA	NA	NA	NA	NA	NA	NA	NA	NA	NA	NA	NA	NA	NA	NA	NA	NA
GBR_B16A	GBR_APP_16_B	Bombus terrestris	United Kingdom	Apple	51.20243	39.72	450.396	124.091	7.873	1.521	28.94	4.23	Boscalid	Pyraclostrobin	Captan	Chlorantraniliprole	Dithianon	Potassium Phosphonates	Difenoconazole	Trifloxystrobin	Sulphur	Flonicamid	Glyphosate	Methoxyfenozide	Pyrimethanil	Fluxapyroxad	Dodine	Proquinazid	Penconazole	NA	NA	NA	NA	NA	NA	NA	NA	NA	NA	NA
GBR_B16B	GBR_APP_16_B	Bombus terrestris	United Kingdom	Apple	51.20243	39.72	450.396	124.091	7.873	1.521	28.94	4.55	Boscalid	Pyraclostrobin	Captan	Chlorantraniliprole	Dithianon	Potassium Phosphonates	Difenoconazole	Trifloxystrobin	Sulphur	Flonicamid	Glyphosate	Methoxyfenozide	Pyrimethanil	Fluxapyroxad	Dodine	Proquinazid	Penconazole	NA	NA	NA	NA	NA	NA	NA	NA	NA	NA	NA
GBR_B16C	GBR_APP_16_B	Bombus terrestris	United Kingdom	Apple	51.20243	39.72	450.396	124.091	7.873	1.521	28.94	3.77	Boscalid	Pyraclostrobin	Captan	Chlorantraniliprole	Dithianon	Potassium Phosphonates	Difenoconazole	Trifloxystrobin	Sulphur	Flonicamid	Glyphosate	Methoxyfenozide	Pyrimethanil	Fluxapyroxad	Dodine	Proquinazid	Penconazole	NA	NA	NA	NA	NA	NA	NA	NA	NA	NA	NA
GBR_B16D	GBR_APP_16_B	Bombus terrestris	United Kingdom	Apple	51.20243	39.72	450.396	124.091	7.873	1.521	28.94	4.40	Boscalid	Pyraclostrobin	Captan	Chlorantraniliprole	Dithianon	Potassium Phosphonates	Difenoconazole	Trifloxystrobin	Sulphur	Flonicamid	Glyphosate	Methoxyfenozide	Pyrimethanil	Fluxapyroxad	Dodine	Proquinazid	Penconazole	NA	NA	NA	NA	NA	NA	NA	NA	NA	NA	NA
GBR_B16E	GBR_APP_16_B	Bombus terrestris	United Kingdom	Apple	51.20243	39.72	450.396	124.091	7.873	1.521	28.94	5.13	Boscalid	Pyraclostrobin	Captan	Chlorantraniliprole	Dithianon	Potassium Phosphonates	Difenoconazole	Trifloxystrobin	Sulphur	Flonicamid	Glyphosate	Methoxyfenozide	Pyrimethanil	Fluxapyroxad	Dodine	Proquinazid	Penconazole	NA	NA	NA	NA	NA	NA	NA	NA	NA	NA	NA
